# Supplementary material for: Electrochemical selective annulative amino-ketalization and amino-oxygenation of 1,6-enynes
Source: Royal Society of Chemistry journal article supplement (doi:10.1039/d2cc03922b), 2022-01-01

## Supporting Information

### Electrochemical selective annulative amino-ketalization and amino-oxygenation of 1,6-enynes

Xiao-Shuang Ji,<sup>a,1</sup> Hang-Dong Zuo,<sup>a,b,1</sup> Yi-Ting Shen,<sup>a</sup> Wen-Juan Hao,<sup>\*,a</sup> Shu-Jiang Tu<sup>\*,a</sup> and Bo Jiang<sup>\*,a</sup>

<sup>a</sup>School of Chemistry & Materials Science, Jiangsu Normal University, Xuzhou, 221116, P. R. China; email: wjhao@jsnu.edu.cn (WJH); laotu@jsnu.edu.cn (SJT); jiangchem@jsnu.edu.cn (BJ)

<sup>b</sup>School of Environmental and Safety Engineering, Changzhou University, Changzhou 213164, Jiangsu

<sup>1</sup> These authors contributed equally.

### Contents

|                                                                                                      |         |
|------------------------------------------------------------------------------------------------------|---------|
| General Information.....                                                                             | S2      |
| Optimization of the Reaction Conditions.....                                                         | S2-S3   |
| Synthetic Applications of <b>3a</b> and <b>4a</b> .....                                              | S3      |
| Control Experiments.....                                                                             | S3      |
| X-Ray Structure of Product <b>3g</b> .....                                                           | S4      |
| Cyclic Voltammogram.....                                                                             | S4      |
| General Procedure for the Synthesis of Substrates <b>1</b> and <b>2</b> .....                        | S4-S5   |
| General Procedure for the Synthesis of Products <b>3-6</b> .....                                     | S5-S6   |
| General Procedure for Control Experiments.....                                                       | S6      |
| Characterization Data of Compounds <b>3a-3ab</b> .....                                               | S7-S15  |
| Characterization Data of Compounds <b>4a-4f</b> .....                                                | S15-S17 |
| Characterization Data of Compounds <b>5a</b> and <b>6a</b> .....                                     | S17-S18 |
| Reference.....                                                                                       | S18     |
| Copies of <sup>1</sup> H and <sup>13</sup> C NMR Spectra of Compounds <b>3a-3ab</b> .....            | S19-S72 |
| Copies of <sup>1</sup> H and <sup>13</sup> C NMR Spectra of Compounds <b>4a-4f</b> .....             | S73-S84 |
| Copies of <sup>1</sup> H and <sup>13</sup> C NMR Spectra for Compounds <b>5a</b> and <b>6a</b> ..... | S85-S88 |

## General Information

PE refers to petroleum ether (b.p. 60-90 °C) and EA refers to ethyl acetate, as well as DCE refers to dichloroethane. All other starting materials and solvents were commercially available and were used without further purification unless otherwise stated. <sup>1</sup>H NMR (<sup>13</sup>C NMR) spectra were measured on a Bruker DPX 400 MHz spectrometer in CDCl<sub>3</sub> (or DMSO-*d*<sub>6</sub>) with chemical shift (δ) given in ppm relative to TMS as internal standard [(s = singlet, d = doublet, m = multiplet), coupling constant (Hz)]. HRMS (APCI) was determined by using microTOF-QII HRMS/MS instrument (BRUKER). X-Ray crystallographic analysis was performed with a Siemens SMART CCD and a Siemens P4 diffractometer. The melting points were measured with digital melting point detector. CV curves were recorded using a three-electrode scheme. The working electrode was a platinum plate, A platinum wire served as counter electrode. Ag/AgCl electrode was used as the reference electrode. The working electrode was polished before recording each CV curve.

**Table S1.** Condition optimization for product **3a**<sup>a</sup>

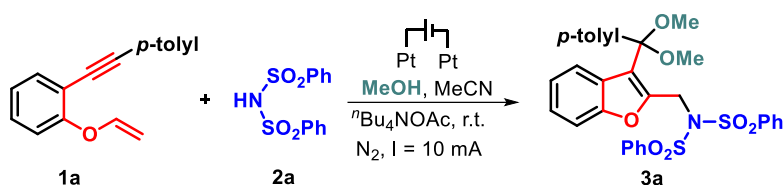

| entry            | variation from the established conditions                                                                                                                                                    | yield (%) <sup>b</sup> |
|------------------|----------------------------------------------------------------------------------------------------------------------------------------------------------------------------------------------|------------------------|
| 1                | none                                                                                                                                                                                         | 53                     |
| 2                | Air instead of N <sub>2</sub>                                                                                                                                                                | 18                     |
| 3                | 5 mA instead of 10 mA                                                                                                                                                                        | trace                  |
| 4                | 20 mA instead of 10 mA                                                                                                                                                                       | 31                     |
| 5 <sup>d,e</sup> | MeOH/MeCN (2:3) as solvent                                                                                                                                                                   | 25                     |
| 6 <sup>d,e</sup> | MeOH/MeOH (1:4) as solvent                                                                                                                                                                   | trace                  |
| 7                | DCE instead of MeCN                                                                                                                                                                          | 65                     |
| 8                | Toluene instead of MeCN                                                                                                                                                                      | 61                     |
| 9                | THF instead of MeCN                                                                                                                                                                          | 27                     |
| 10               | 1,4-dioxane instead of MeCN                                                                                                                                                                  | <5%                    |
| 11               | DMF instead of MeCN                                                                                                                                                                          | <5%                    |
| 12               | 30 °C instead of 25 °C                                                                                                                                                                       | 45                     |
| 13               | <sup>t</sup> Bu <sub>4</sub> NBF <sub>4</sub> , <sup>t</sup> Bu <sub>4</sub> NHSO <sub>4</sub> , <sup>t</sup> Bu <sub>4</sub> NClO <sub>4</sub> instead of <sup>t</sup> Bu <sub>4</sub> NOAc | N.D.                   |
| 14 <sup>c</sup>  | GR(+) Pt(-) instead of Pt(+) Pt(-)                                                                                                                                                           | trace                  |

<sup>a</sup>Reaction conditions: Pt anode, Pt cathode, undivided cell, constant current = 10 mA, **1a** (0.2 mmol), **2a** (0.6 mmol), and <sup>t</sup>Bu<sub>4</sub>NOAc (0.6 mmol), MeOH (1.5 mL), and DCE (3.5 mL) under room temperature for 4 h.

<sup>b</sup>Isolated yield based on substrate **1a**. <sup>c</sup>Graphite rod (GR) electrode. <sup>d</sup>Volume ratio. <sup>e</sup>Total solvent (5.0 mL).

**Table S2.** Optimization of the reaction conditions for forming **4a**<sup>a</sup>

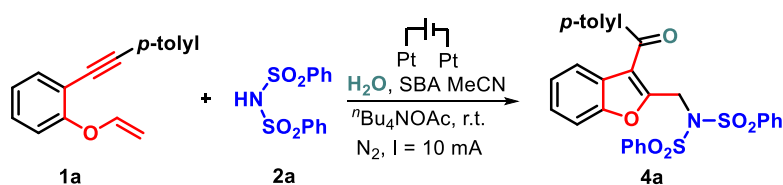

| entry | variation from the established conditions | yield (%) <sup>b</sup> |
|-------|-------------------------------------------|------------------------|
|-------|-------------------------------------------|------------------------|

|   |                                          |       |
|---|------------------------------------------|-------|
| 1 | none                                     | 56    |
| 2 | IPA (1.5 mL) instead of SBA              | 45    |
| 3 | NBA (1.5 mL) instead of SBA              | 47    |
| 4 | H <sub>2</sub> O (1.5 mL) instead of SBA | 23    |
| 5 | 1,4-dioxane instead of DCE               | trace |
| 6 | Toluene instead of DCE                   | trace |
| 7 | DMSO instead of DCE                      | N.D.  |

<sup>a</sup>Reaction conditions: Pt anode, Pt cathode, undivided cell, constant current = 10 mA, **1a** (0.2 mmol), **2a** (0.6 mmol), and <sup>n</sup>Bu<sub>4</sub>NOAc (0.6 mmol), SBA (1.5 mL), and DCE (3.5 mL) under room temperature for 4 h. <sup>b</sup>Isolated yield based on substrate **1a**. <sup>c</sup>Total solvent (5.0 mL). SBA = *sec*-butyl alcohol, IPA = *i*-propyl alcohol, NBA = *n*-butyl alcohol.

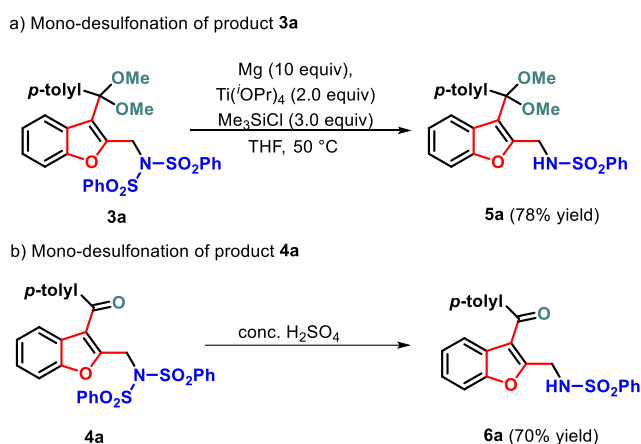

**Scheme S1.** Synthetic application of **3a** and **4a**

The presence of disulfonimides provides great possibilities for late-stage modifications (Scheme S1). For instance, mono-desulfonylation of compound **3a** in the presence of magnesium powder, Ti(*i*OPr)<sub>4</sub> and Me<sub>3</sub>SiCl gave sulfonamide-substituted benzofuran **5a** in 78% yield (Scheme S1a).<sup>1</sup> Next, mono-desulfonylation of compound **4a** in the presence of conc. H<sub>2</sub>SO<sub>4</sub> afforded sulfonamide-substituted benzofuran **6a** in 70% yield (Scheme S1b).<sup>2</sup>

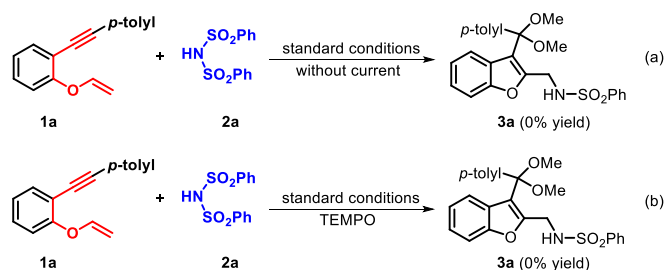

**Scheme S2** Control experiments.

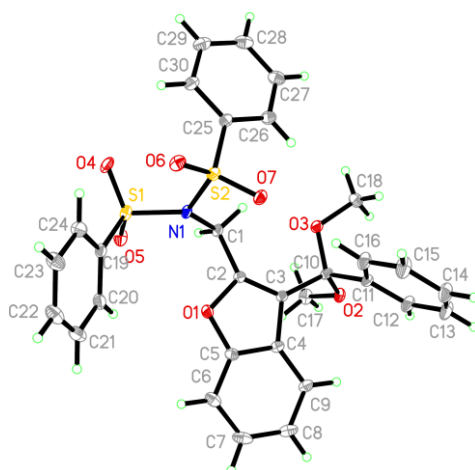

**Figure S1** X-Ray structure of **3g** (CCDC 2189675)

A single crystal **3g** was obtained by slowly evaporating the mixed solvent of hexane and dichloromethane (V/V = 2:1) at room temperature under the air conditions.

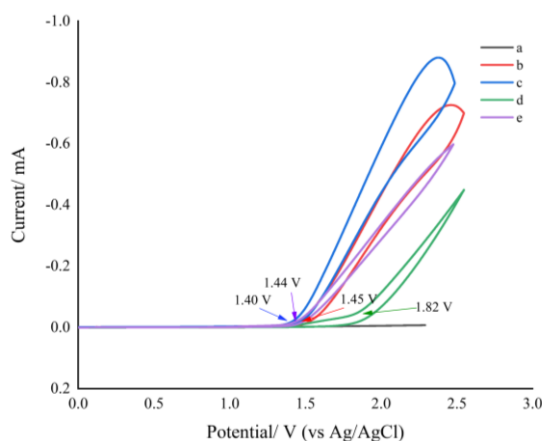

**Figure S2.** Cyclic voltammograms of the solution in DCE/MeOH (V/V 3.5/1.5) using a Pt wire working electrode, Pt disk, and Ag/AgCl (in saturated KCl solution) as counter and reference electrodes at a scan rate of 10 mV/s: (a) background; (b) <sup>n</sup>Bu<sub>4</sub>NOAc (2 mmol/L); (c) **1a** (2 mmol/L), <sup>n</sup>Bu<sub>4</sub>NOAc (2 mmol/L); (d) **2a** (2 mmol/L), <sup>n</sup>Bu<sub>4</sub>NOAc (2 mmol/L); (e) **1a** (2 mmol/L), **2a** (2 mmol/L), and <sup>n</sup>Bu<sub>4</sub>NOAc (2 mmol/L).

### General procedure for the synthesis of 2-vinyloxy arylalkyne<sup>1</sup>

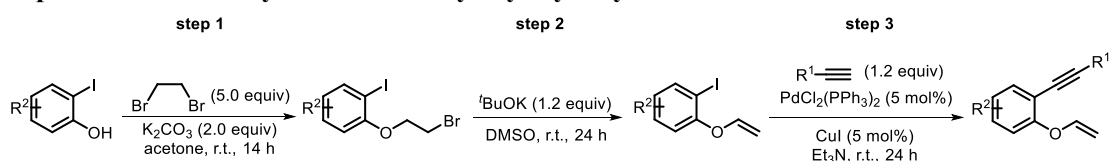

**Step 1:** To a solution of 2-iodophenol (5.0 mmol) and 1,2-dibromoethane (5.0 equiv) in acetone (50 mL) was added K<sub>2</sub>CO<sub>3</sub> (2.0 equiv). The resulting mixture was stirred at room temperature for 14 h and then reflux for 6 h. The reaction was quenched with water and extracted with CH<sub>2</sub>Cl<sub>2</sub>. The organic layer was washed with brine, dried over Na<sub>2</sub>SO<sub>4</sub>, and concentrated. The crude product was purified by a silica gel column chromatography (petroleum ether (PE)/ ethyl acetate (EA) = 100:1 V/V) to give **A** (65~76% yields) as a colorless oil.

**Step 2:** To a solution of **A** (3.0 mmol) in DMSO (20 mL) was added <sup>t</sup>BuOK (1.5 equiv). The resulting mixture was stirred at room temperature for 2 h. The reaction mixture was filtered and washed with CH<sub>2</sub>Cl<sub>2</sub>. The combined filtrate was concentrated and the residue was purified by a silica gel column chromatography (PE/EtOAc = 100:1 V/V) to give **B** (81~95% yields) as a yellow oil.

**Step 3:** To a solution of **B** (1.0 mmol) and alkyne (1.1 equiv) in triethylamine (10 mL) was added PdCl<sub>2</sub>(PPh<sub>3</sub>)<sub>2</sub>

(5 mol%) and CuI (5 mol%). The resulting mixture was stirred at room temperature for 24–36 h. The reaction mixture was filtered and washed with Et<sub>2</sub>O. The combined filtrate was concentrated and the residue was purified by a silica gel column chromatography (PE/EtOAc = 100:1 V/V) and recycling preparative GPC to give **1a-1t** (68–92% yields)

### General procedure for the synthesis of disulfonimides **2**<sup>2</sup>

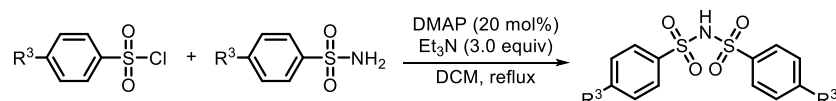

A mixture of PhSO<sub>2</sub>Cl (5.0 mmol), PhSO<sub>2</sub>NH<sub>2</sub> (1.0 equiv), DMAP (20 mol%) and Et<sub>3</sub>N (3.0 equiv) in DCM (5 mL) was refluxed for 2 h (monitored by TLC). After cooling to room temperature, the reaction was poured into 1 mol/L HCl (10 mL), extracted with DCM, and dried over anhydrous Na<sub>2</sub>SO<sub>4</sub>. The solvent was evaporated to afford the product as a colorless oil, which was used in the next step without purification (80%, yields).

### General procedure for the synthesis of compounds **3**

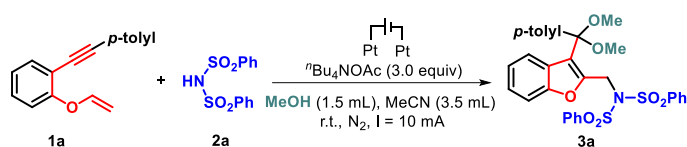

In an undivided flask (10 mL) equipped with a stir bar under nitrogen conditions, 1,6-enyne **1a** (0.2 mmol, 1.0 equiv, 47 mg), dibenzenesulfonimide (**2a**, 0.6 mmol, 3.0 equiv, 178 mg), <sup>t</sup>Bu<sub>4</sub>NOAc (0.6 mmol, 3.0 equiv, 180 mg), and mixed solvent CH<sub>3</sub>OH/DCE (V/V = 1.5/3.5, 5.0 mL) were added. The reaction flask was equipped with Pt disk as anode and cathode (1.0 × 1.5 cm<sup>2</sup>). The solution was stirred and electrolyzed at a constant current (10 mA) without reference electrode for 4 h at room temperature until complete consumption of **1a** as monitored by TLC analysis. After the reaction was finished, the solution was concentrated under reduced pressure. The resulting residue was purified by silica gel column chromatography (PE/EA = 10:1 V/V) to afford the desired product **3a** (77 mg, 65% yield).

### General procedure for the synthesis of compounds **4**

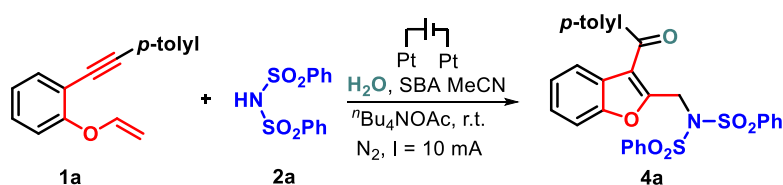

In an undivided flask (10 mL) equipped with a stir bar under nitrogen conditions, 1,6-enyne **1a** (0.2 mmol, 1.0 equiv, 47 mg), dibenzenesulfonimide (**2a**, 0.6 mmol, 3.0 equiv, 178 mg), <sup>t</sup>Bu<sub>4</sub>NOAc (0.6 mmol, 3.0 equiv, 180 mg), and mixed solvent SBA/DCE (V/V = 1.5/3.5, 5.0 mL) were added. The reaction flask was equipped with Pt disk as anode and cathode (1.0 × 1.5 cm<sup>2</sup>). The solution was stirred and electrolyzed at a constant current (10 mA) without reference electrode for 4 h at room temperature until complete consumption of **1a** as monitored by TLC analysis. After the reaction was finished, the solution was concentrated under reduced pressure. The resulting residue was purified by silica gel column chromatography (PE/EA = 10:1 V/V) to afford the desired product **4a** (61 mg, 56% yield).

### Synthetic Application of **3a**<sup>3</sup>

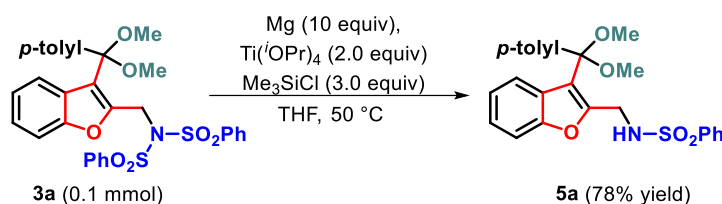

To a Schlenk tube were added **3a** (0.1 mmol, 1.0 equiv, 59 mg), magnesium (1.0 mmol, 10.0 equiv, 24 mg),  $\text{Ti}(\text{iPr})_4$  (0.2 mmol, 2.0 equiv, 57 mg),  $\text{Me}_3\text{SiCl}$  (0.3 mmol, 3.0 equiv, 33 mg) and THF (2.0 mL) the protection with argon. The resulting mixture was heated at 50 °C. After the reaction was completed, the solution was concentrated in vacuo and purified by flash chromatography on silica gel (PE/EA = 10/1 V/V) to afford the desired product **5a** (35 mg, 78% yield) as the white solid.

### Synthetic Application of **4a**<sup>4</sup>

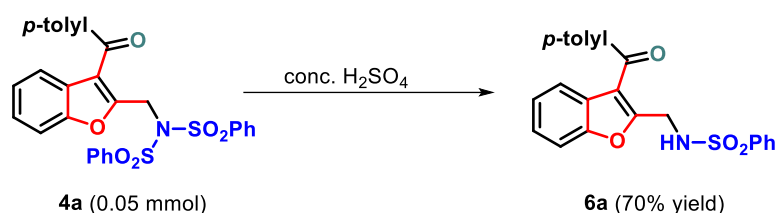

To a 5-mL pressure tube under air conditions, 1.5 mL conc.  $\text{H}_2\text{SO}_4$  was added into **4a** (0.05 mmol, 1.0 equiv, 27 mg) and stirred at 25 °C for 1 hour. Upon completion, the mixture was poured into water and neutralized with NaOH solid. Then the mixture was extracted by EA. The organic layer was dried over anhydrous  $\text{Na}_2\text{SO}_4$  and concentrated on rotavapor under reduced pressure. Finally, on silica gel (PE/EA = 10/1 V/V) to afford the desired product **6a** (16 mg, 78% yield) as the white solid.

### Radical-Trapping Experiment:

TEMPO as the radical trapping reagent — General procedure

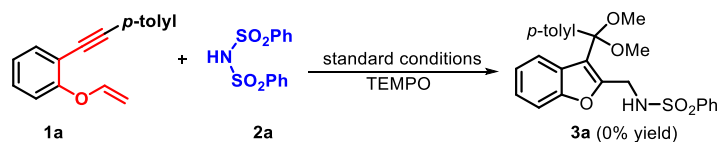

In an undivided flask (10 mL) under nitrogen, 1,6-enyne **1a** (0.2 mmol, 1.0 equiv, 47 mg), dibenzenesulfonimide (**2a**, 0.6 mmol, 3.0 equiv, 178 mg),  $\text{tBu}_4\text{NOAc}$  (0.6 mmol, 3.0 equiv, 180 mg) and TEMPO (0.6 mmol, 3.0 equiv, 94 mg) in a mixed solvent of 1,2-dichloroethane (DCE) and methanol (V/V = 3.5/1.5, 5.0 mL) was stirred at 25 °C for 2 hours. The corresponding product **3a** was not detected according to TLC analysis.

### Control Experiments

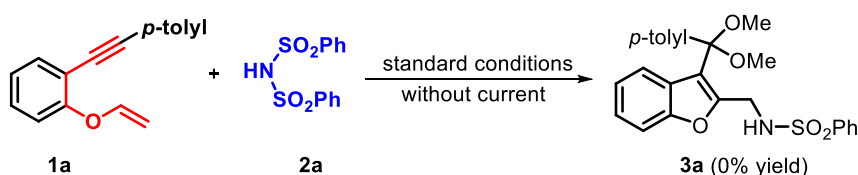

In a tube (10 mL) equipped with a stir bar under nitrogen, **1a** (0.2 mmol, 1.0 equiv, 47 mg), **2a** (0.6 mmol, 3.0 equiv, 178 mg),  $\text{tBu}_4\text{NOAc}$  (0.6 mmol, 3.0 equiv, 180 mg), and mixed solvent DCE/ $\text{CH}_3\text{OH}$  (V/V = 3.5/1.5, 5.0 mL) were added and stirred at 25 °C for 4 hours. The corresponding product (**3a**) was not detected according to

TLC analysis.

### Characterization data

#### *N*-((3-(Dimethoxy(*p*-tolyl)methyl)benzofuran-2-yl)methyl)-*N*-(phenylsulfonyl)benzenesulfonamide (**3a**)

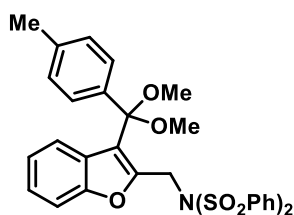

White solid, 77 mg, 65%; m.p. 129-130 °C; <sup>1</sup>H NMR (400 MHz, CDCl<sub>3</sub>) (δ, ppm) 8.07 (d, *J* = 8.0 Hz, 4H), 7.62 – 7.57 (m, 4H), 7.50 – 7.45 (m, 4H), 7.37 (d, *J* = 7.6 Hz, 1H), 7.14 (d, *J* = 8.0 Hz, 2H), 7.11 – 7.07 (m, 1H), 7.05 – 7.01 (m, 1H), 6.96 (d, *J* = 8.0 Hz, 1H), 5.55 (s, 2H), 3.16 (s, 6H), 2.31 (s, 3H). <sup>13</sup>C NMR (100 MHz, CDCl<sub>3</sub>) (δ, ppm) 153.7, 148.7, 139.7, 138.0, 137.6, 133.8, 128.9, 128.7, 127.0, 126.6, 124.1, 122.9, 121.4, 118.1, 110.9, 102.1, 49.3, 45.4, 21.3. IR (KBr, ν, cm<sup>-1</sup>) 1606, 1363, 1265, 1084, 907, 791, 774, 745. HR-MS (ESI) *m/z* calcd for C<sub>31</sub>H<sub>29</sub>NNaO<sub>7</sub>S<sub>2</sub> [M+Na]<sup>+</sup> 614.1283, found 614.1265.

#### *N*-((3-(Dimethoxy(*m*-tolyl)methyl)benzofuran-2-yl)methyl)-*N*-(phenylsulfonyl)benzenesulfonamide (**3b**)

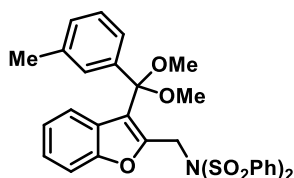

White solid, 56 mg 47%; m.p. 135-136 °C; <sup>1</sup>H NMR (400 MHz, CDCl<sub>3</sub>) (δ, ppm) 8.05 (d, *J* = 8.0 Hz, 4H), 7.61 – 7.57 (m, 2H), 7.52 (d, *J* = 9.2 Hz, 2H), 7.48 – 7.43 (m, 4H), 7.41 (d, *J* = 7.6 Hz, 1H), 7.22 (d, *J* = 7.6 Hz, 1H), 7.10 – 7.03 (m, 3H), 6.96 (d, *J* = 8.0 Hz, 1H), 5.55 (s, 2H), 3.17 (s, 6H), 2.33 (s, 3H). <sup>13</sup>C NMR (100 MHz, CDCl<sub>3</sub>) (δ, ppm) 153.7, 148.6, 140.5, 139.7, 137.8, 133.8, 129.0, 128.8, 128.7, 128.0, 127.6, 126.6, 124.2, 124.0, 122.9, 121.4, 118.2, 110.9, 102.1, 49.3, 45.5, 21.6. IR (KBr, ν, cm<sup>-1</sup>) 1605, 1361, 1259, 1169, 1084, 895, 865, 800, 720. HR-MS (ESI) *m/z* calcd for C<sub>31</sub>H<sub>29</sub>NNaO<sub>7</sub>S<sub>2</sub> [M+Na]<sup>+</sup> 614.1283, found 614.1267.

#### *N*-((3-(Dimethoxy(*o*-tolyl)methyl)benzofuran-2-yl)methyl)-*N*-(phenylsulfonyl)benzenesulfonamide (**3c**)

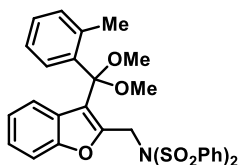

White solid, 56 mg, 47%; m.p. 166-167 °C; <sup>1</sup>H NMR (400 MHz, CDCl<sub>3</sub>) (δ, ppm) 8.13 – 8.07 (m, 5H), 7.68 – 7.64 (m, 2H), 7.57 – 7.52 (m, 4H), 7.29 (d, *J* = 7.2 Hz, 1H), 7.26 – 7.20 (m, 2H), 7.11 – 7.05 (m, 2H), 7.01 (d, *J* = 6.8 Hz, 1H), 6.96 (d, *J* = 4.4 Hz, 1H), 5.26 (s, 2H), 3.15 (s, 6H), 2.11 (s, 3H). <sup>13</sup>C NMR (100 MHz, DMSO-*d*<sub>6</sub>) (δ, ppm) 153.2, 139.1, 137.7, 136.5, 135.1, 132.3, 129.9, 129.2, 128.6, 128.4, 126.1, 124.7, 123.4, 111.3, 101.2, 49.0, 20.2. IR (KBr, ν, cm<sup>-1</sup>) 1601, 1362, 1084, 907, 807. HR-MS (ESI) *m/z* calcd for C<sub>31</sub>H<sub>29</sub>NNaO<sub>7</sub>S<sub>2</sub> [M+Na]<sup>+</sup> 614.1283, found 614.1262.

#### *N*-((3-((4-Ethylphenyl)dimethoxymethyl)benzofuran-2-yl)methyl)-*N*-(phenylsulfonyl)benzenesulfonamide (**3d**)

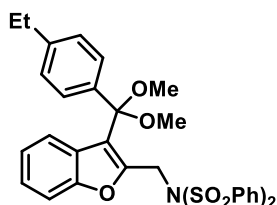

White solid, 42 mg, 39%; m.p. 123-124 °C;  $^1\text{H}$  NMR (400 MHz,  $\text{CDCl}_3$ ) ( $\delta$ , ppm) 8.07 (d,  $J = 8.0$  Hz, 4H), 7.62 – 7.57 (m, 4H), 7.49 – 7.44 (m, 4H), 7.39 (d,  $J = 7.6$  Hz, 1H), 7.16 (d,  $J = 8.0$  Hz, 2H), 7.11 – 7.07 (m, 1H), 7.05 – 7.01 (m, 1H), 6.96 (d,  $J = 8.0$  Hz, 1H), 5.55 (s, 2H), 3.17 (s, 6H), 2.64 – 2.58 (m, 2H), 1.21 – 1.17 (m, 3H).  $^{13}\text{C}$  NMR (100 MHz,  $\text{CDCl}_3$ ) ( $\delta$ , ppm) 153.7, 148.7, 144.2, 139.7, 137.8, 133.8, 128.8, 128.7, 127.6, 127.0, 126.6, 124.0, 122.8, 121.4, 118.2, 110.9, 102.2, 49.3, 45.4, 28.6, 15.4. IR (KBr,  $\nu$ ,  $\text{cm}^{-1}$ ) 1616, 1449, 1378, 1167, 1083, 929, 801. HR-MS (ESI)  $m/z$  calcd for  $\text{C}_{32}\text{H}_{31}\text{NNaO}_7\text{S}_2$   $[\text{M}+\text{Na}]^+$  628.1440, found 628.1419.

***N-((3-((4-(tert-Butyl)phenyl)dimethoxymethyl)benzofuran-2-yl)methyl)-N-(phenylsulfonyl)benzenesulfonamide (3e)***

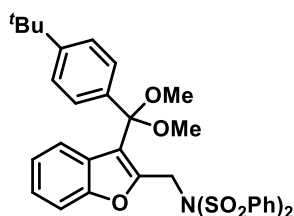

White solid, 65 mg, 51%; m.p. 149-150 °C;  $^1\text{H}$  NMR (400 MHz,  $\text{CDCl}_3$ ) ( $\delta$ , ppm) 8.05 (d,  $J = 8.0$  Hz, 4H), 7.62 – 7.56 (m, 4H), 7.48 – 7.42 (m, 5H), 7.34 (d,  $J = 8.4$  Hz, 2H), 7.11 – 7.07 (m, 1H), 7.06 – 7.02 (m, 1H), 6.96 (d,  $J = 8.0$  Hz, 1H), 5.55 (s, 2H), 3.17 (s, 6H), 1.27 (s, 9H).  $^{13}\text{C}$  NMR (100 MHz,  $\text{CDCl}_3$ ) ( $\delta$ , ppm) 153.6, 151.1, 148.6, 139.6, 137.5, 133.8, 128.8, 128.7, 126.6, 125.0, 124.0, 122.8, 121.5, 118.2, 110.9, 102.2, 49.3, 45.4, 34.6, 31.4. IR (KBr,  $\nu$ ,  $\text{cm}^{-1}$ ) 1604, 1360, 1246, 1170, 1084, 910, 800. HR-MS (ESI)  $m/z$  calcd for  $\text{C}_{34}\text{H}_{35}\text{NNaO}_7\text{S}_2$   $[\text{M}+\text{Na}]^+$  656.1753, found 656.1729.

***N-((3-([1,1'-Biphenyl]-4-yl)dimethoxymethyl)benzofuran-2-yl)methyl)-N-(phenylsulfonyl)benzenesulfonamide (3f)***

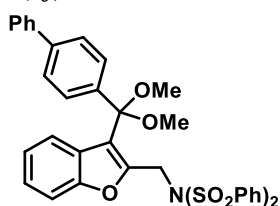

White solid, 95 mg, 73%; m.p. 110-111 °C;  $^1\text{H}$  NMR (400 MHz,  $\text{CDCl}_3$ ) ( $\delta$ , ppm) 8.04 (d,  $J = 7.2$  Hz, 4H), 7.94 (d,  $J = 8.0$  Hz, 2H), 7.73 (d,  $J = 8.4$  Hz, 2H), 7.67 (d,  $J = 7.6$  Hz, 2H), 7.63 – 7.59 (m, 2H), 7.53 – 7.46 (m, 7H), 7.44 – 7.40 (m, 1H), 7.29 (d,  $J = 7.6$  Hz, 2H), 7.21 – 7.17 (m, 1H), 5.34 (s, 2H), 3.49 (s, 6H).  $^{13}\text{C}$  NMR (100 MHz,  $\text{CDCl}_3$ ) ( $\delta$ , ppm) 153.7, 148.9, 140.9, 140.6, 139.7, 139.6, 133.8, 128.8, 128.7, 127.6, 127.5, 127.1, 126.8, 126.6, 124.1, 122.9, 121.4, 117.9, 111.0, 102.1, 49.4, 45.4. IR (KBr,  $\nu$ ,  $\text{cm}^{-1}$ ) 1635, 1378, 1169, 1083, 1049, 801, 771, 750, 685. HR-MS (ESI)  $m/z$  calcd for  $\text{C}_{36}\text{H}_{31}\text{NNaO}_7\text{S}_2$   $[\text{M}+\text{Na}]^+$  676.1440, found 676.1413.

***N-((3-(Dimethoxy(phenyl)methyl)benzofuran-2-yl)methyl)-N-(phenylsulfonyl)benzenesulfonamide (3g)***



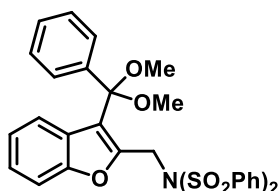

White solid, 70 mg, 61%; m.p. 172-173 °C; <sup>1</sup>H NMR (400 MHz, CDCl<sub>3</sub>) (δ, ppm) 8.07 (d, *J* = 8.0 Hz, 4H), 7.71 (d, *J* = 7.6 Hz, 2H), 7.62 – 7.57 (m, 2H), 7.49 – 7.45 (m, 4H), 7.38 – 7.32 (m, 3H), 7.28 (d, *J* = 7.2 Hz, 1H), 7.12 – 7.07 (m, 1H), 7.05 – 7.01 (m, 1H), 6.97 (d, *J* = 8.0 Hz, 1H), 5.56 (s, 2H), 3.18 (s, 6H). <sup>13</sup>C NMR (100 MHz, CDCl<sub>3</sub>) (δ, ppm) 153.6, 148.8, 140.5, 139.6, 134.0, 133.8, 128.8, 128.7, 128.2, 128.1, 127.0, 126.5, 124.0, 122.8, 121.3, 117.9, 110.9, 102.0, 49.2, 45.4. IR (KBr, ν, cm<sup>-1</sup>) 1601, 1363, 1169, 1084, 858, 774, 750. HR-MS (ESI) *m/z* calcd for C<sub>30</sub>H<sub>27</sub>NNaO<sub>7</sub>S<sub>2</sub> [M+Na]<sup>+</sup> 600.1127, found 600.1102.

***N*-((3-((4-Fluorophenyl)dimethoxymethyl)benzofuran-2-yl)methyl)-*N*-(phenylsulfonyl)benzenesulfonamide (3h)**

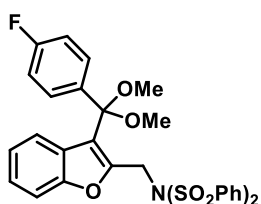

White solid, 67 mg 56%; m.p. 129-130 °C; <sup>1</sup>H NMR (400 MHz, CDCl<sub>3</sub>) (δ, ppm) 8.04 (d, *J* = 8.0 Hz, 4H), 7.91 – 7.86 (m, 2H), 7.64 – 7.60 (m, 2H), 7.53 – 7.49 (m, 4H), 7.32 – 7.27 (m, 2H), 7.19 – 7.15 (m, 4H), 5.31 (s, 2H), 3.49 (s, 6H). <sup>13</sup>C NMR (100 MHz, CDCl<sub>3</sub>) (δ, ppm) 153.7, 149.0, 139.6, 136.4, 133.9, 129.1, 129.0, 128.9, 128.7, 126.4, 124.2, 123.0, 121.1, 117.7, 115.1, 114.9, 111.0, 101.7, 49.3, 45.4. IR (KBr, ν, cm<sup>-1</sup>) 1601, 1363, 1123, 1068, 951, 775. HR-MS (ESI) *m/z* calcd for C<sub>30</sub>H<sub>26</sub>FNNaO<sub>7</sub>S<sub>2</sub> [M+Na]<sup>+</sup> 618.1032, found 618.1035.

***N*-((3-((4-Chlorophenyl)dimethoxymethyl)benzofuran-2-yl)methyl)-*N*-(phenylsulfonyl)benzenesulfonamide (3i)**

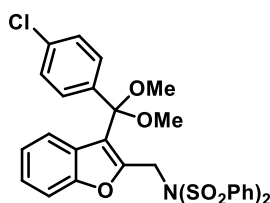

White solid, 72 mg, 59%; m.p. 174-175 °C; <sup>1</sup>H NMR (400 MHz, CDCl<sub>3</sub>) (δ, ppm) 8.07 (d, *J* = 8.0 Hz, 4H), 7.67 (d, *J* = 8.4 Hz, 2H), 7.61 (d, *J* = 7.6 Hz, 2H), 7.51 – 7.47 (m, 4H), 7.32 – 7.28 (m, 3H), 7.14 – 7.10 (m, 1H), 7.05 – 7.01 (m, 1H), 6.98 (d, *J* = 8.4 Hz, 1H), 5.53 (s, 2H), 3.15 (s, 6H). <sup>13</sup>C NMR (100 MHz, CDCl<sub>3</sub>) (δ, ppm) 153.7, 149.2, 139.6, 139.2, 134.2, 134.0, 131.1, 129.1, 128.9, 128.8, 128.4, 124.3, 123.0, 121.1, 111.1, 101.7, 49.4, 45.4. IR (KBr, ν, cm<sup>-1</sup>) 1604, 1363, 1169, 1084, 774. HR-MS (ESI) *m/z* calcd for C<sub>30</sub>H<sub>26</sub>ClNNaO<sub>7</sub>S<sub>2</sub> [M+Na]<sup>+</sup> 634.0737, found 634.0713.

***N*-((3-((3-Chlorophenyl)dimethoxymethyl)benzofuran-2-yl)methyl)-*N*-(phenylsulfonyl)benzenesulfonamide (3j)**

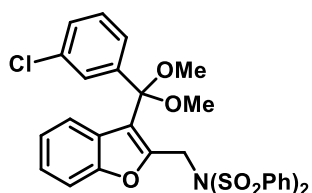

White solid, 61 mg, 50%; m.p. 150-151 °C; <sup>1</sup>H NMR (400 MHz, CDCl<sub>3</sub>) (δ, ppm) 8.07 (d, *J* = 8.0 Hz, 4H), 7.76 (s, 1H), 7.64 – 7.58 (m, 3H), 7.51 – 7.47 (m, 4H), 7.33 (d, *J* = 7.6 Hz, 1H), 7.29 (s, 1H), 7.25 (s, 1H), 7.14 – 7.10 (m, 1H), 7.07 – 7.03 (m, 1H), 6.98 (d, *J* = 8.4 Hz, 1H), 5.53 (s, 2H), 3.16 (s, 6H). <sup>13</sup>C NMR (100 MHz, CDCl<sub>3</sub>) (δ, ppm) 153.7, 149.1, 142.8, 139.7, 134.2, 133.9, 129.6, 128.9, 128.7, 128.5, 127.3, 126.3, 125.5, 124.3, 123.0, 121.1, 117.3, 111.0, 101.6, 49.4, 45.4. IR (KBr, ν, cm<sup>-1</sup>) 1605, 1363, 1169, 1084, 940, 857, 774, 685. HR-MS (ESI) *m/z* calcd for C<sub>30</sub>H<sub>26</sub>ClNNaO<sub>7</sub>S<sub>2</sub> [M+Na]<sup>+</sup> 634.0737, found 634.0741.

***N*-((3-((2-Chlorophenyl)dimethoxymethyl)benzofuran-2-yl)methyl)-*N*-(phenylsulfonyl)benzenesulfonamide (3k)**

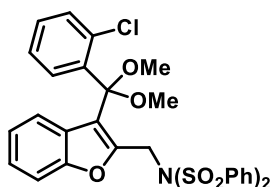

White solid, 60 mg, 49%; m.p. 129-130 °C; <sup>1</sup>H NMR (400 MHz, CDCl<sub>3</sub>) (δ, ppm) 8.07 (d, *J* = 8.0 Hz, 4H), 7.66 – 7.61 (m, 2H), 7.52 (d, *J* = 12.8 Hz, 5H), 7.48 (d, *J* = 8.8 Hz, 2H), 7.43 – 7.39 (m, 1H), 7.23 (d, *J* = 7.2 Hz, 1H), 7.15 – 7.11 (m, 2H), 6.86 (d, *J* = 7.6 Hz, 1H), 5.40 (s, 2H), 3.49 (s, 6H). <sup>13</sup>C NMR (100 MHz, CDCl<sub>3</sub>) (δ, ppm) 153.4, 139.7, 136.6, 133.9, 131.4, 130.3, 129.8, 128.9, 128.9, 126.4, 123.8, 122.7, 110.9, 100.7, 49.2, 46.3. IR (KBr, ν, cm<sup>-1</sup>) 1605, 1363, 1164, 1084, 929, 774. HR-MS (ESI) *m/z* calcd for C<sub>30</sub>H<sub>26</sub>ClNNaO<sub>7</sub>S<sub>2</sub> [M+Na]<sup>+</sup> 634.0737, found 634.0735.

***N*-((3-((4-Bromophenyl)dimethoxymethyl)benzofuran-2-yl)methyl)-*N*-(phenylsulfonyl)benzenesulfonamide (3l)**

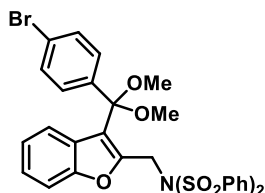

White solid, 102 mg, 78%; m.p. 135-136 °C; <sup>1</sup>H NMR (400 MHz, CDCl<sub>3</sub>) (δ, ppm) 8.06 (d, *J* = 8.4 Hz, 4H), 7.64 – 7.59 (m, 4H), 7.51 – 7.45 (m, 6H), 7.28 (d, *J* = 7.6 Hz, 1H), 7.14 – 7.09 (m, 1H), 7.05 – 7.01 (m, 1H), 6.98 (d, *J* = 8.4 Hz, 1H), 5.53 (s, 2H), 3.15 (s, 6H). <sup>13</sup>C NMR (100 MHz, CDCl<sub>3</sub>) (δ, ppm) 153.6, 149.1, 139.6, 139.6, 133.8, 132.0, 131.3, 129.0, 128.8, 128.6, 126.2, 124.2, 122.9, 122.4, 121.0, 117.3, 111.0, 101.7, 49.3, 45.3. IR (KBr, ν, cm<sup>-1</sup>) 1602, 1355, 1169, 1084, 1050, 801. HR-MS (ESI) *m/z* calcd for C<sub>30</sub>H<sub>26</sub>BrNNaO<sub>7</sub>S<sub>2</sub> [M+Na]<sup>+</sup> 678.0232, found 678.0202.

***Methyl 4*-(Dimethoxy(2-((*N*-(phenylsulfonyl)phenylsulfonamido)methyl)benzofuran-3-yl)methyl)benzoate (3m)**

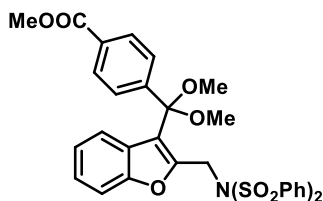

White solid, 41 mg, 32%; m.p. 136-137 °C; <sup>1</sup>H NMR (400 MHz, CDCl<sub>3</sub>) (δ, ppm) 8.06 (d, *J* = 8.0 Hz, 4H), 8.02 (d, *J* = 8.4 Hz, 2H), 7.81 (d, *J* = 8.0 Hz, 2H), 7.63 – 7.59 (m, 2H), 7.50 – 7.45 (m, 4H), 7.30 (d, *J* = 7.6 Hz, 1H), 7.12 – 7.08 (m, 1H), 7.04 – 7.00 (m, 1H), 6.97 (d, *J* = 8.0 Hz, 1H), 5.55 (s, 2H), 3.88 (s, 3H), 3.17 (s, 6H). <sup>13</sup>C NMR (100 MHz, CDCl<sub>3</sub>) (δ, ppm) 166.9, 153.7, 149.2, 145.5, 139.6, 133.9, 130.1, 129.6, 128.9, 128.7,

127.3, 126.2, 124.3, 123.0, 121.0, 117.3, 111.1, 101.8, 52.2, 49.5, 45.4. IR (KBr,  $\nu$ ,  $\text{cm}^{-1}$ ) 1718, 1610, 1449, 1379, 1279, 1169, 1084, 931, 859. HR-MS (ESI)  $m/z$  calcd for  $\text{C}_{32}\text{H}_{29}\text{NNaO}_9\text{S}_2$   $[\text{M}+\text{Na}]^+$  658.1181, found 658.1160.

***N*-((3-(Dimethoxy(4-(trifluoromethyl)phenyl)methyl)benzofuran-2-yl)methyl)-*N*-(phenylsulfonyl)benzenesulfonamide (3n)**

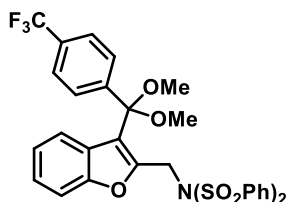

White solid, 57 mg, 44%; m.p. 135-136 °C;  $^1\text{H}$  NMR (400 MHz,  $\text{CDCl}_3$ ) ( $\delta$ , ppm) 8.07 (d,  $J = 8.0$  Hz, 4H), 7.87 (d,  $J = 8.4$  Hz, 2H), 7.64 – 7.59 (m, 4H), 7.52 – 7.47 (m, 4H), 7.28 (d,  $J = 8.0$  Hz, 1H), 7.14 – 7.10 (m, 1H), 7.06 – 7.02 (m, 1H), 6.99 (d,  $J = 8.0$  Hz, 1H), 5.55 (s, 2H), 3.17 (s, 6H).  $^{13}\text{C}$  NMR (100 MHz,  $\text{CDCl}_3$ ) ( $\delta$ , ppm) 153.7, 149.3, 144.5, 139.6, 133.9, 128.9, 128.7, 127.6, 126.1, 125.2, 124.4, 123.1, 120.9, 111.1, 101.6, 49.4, 45.3. IR (KBr,  $\nu$ ,  $\text{cm}^{-1}$ ) 1602, 1356, 1169, 1084, 930, 773. HR-MS (ESI)  $m/z$  calcd for  $\text{C}_{31}\text{H}_{26}\text{F}_3\text{NNaO}_7\text{S}_2$   $[\text{M}+\text{Na}]^+$  668.1000, found 668.1010.

***N*-((3-((4-Cyanophenyl)dimethoxymethyl)benzofuran-2-yl)methyl)-*N*-(phenylsulfonyl)benzenesulfonamide (3o)**

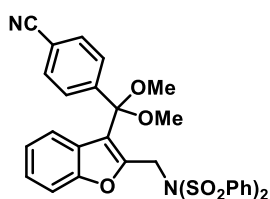

White solid, 99 mg, 82%; m.p. 155-156 °C;  $^1\text{H}$  NMR (400 MHz,  $\text{CDCl}_3$ ) ( $\delta$ , ppm) 8.07 (d,  $J = 8.0$  Hz, 4H), 7.86 (d,  $J = 8.4$  Hz, 2H), 7.63 – 7.58 (m, 4H), 7.51 – 7.47 (m, 4H), 7.28 (d,  $J = 8.0$  Hz, 1H), 7.14 – 7.10 (m, 1H), 7.06 – 7.02 (m, 1H), 6.99 (d,  $J = 8.4$  Hz, 1H), 5.55 (s, 2H), 3.17 (s, 6H).  $^{13}\text{C}$  NMR (100 MHz,  $\text{CDCl}_3$ ) ( $\delta$ , ppm) 153.7, 149.4, 144.5, 139.6, 133.9, 128.9, 128.7, 127.6, 126.2, 125.2, 124.4, 123.1, 121.0, 117.2, 111.1, 101.7, 49.4, 45.4. IR (KBr,  $\nu$ ,  $\text{cm}^{-1}$ ) 2230, 1604, 1362, 1257, 1169, 1027, 839. HR-MS (ESI)  $m/z$  calcd for  $\text{C}_{31}\text{H}_{26}\text{N}_2\text{NaO}_7\text{S}_2$   $[\text{M}+\text{Na}]^+$  625.1079, found 625.1092.

***N*-((3-(Dimethoxy(thiophen-2-yl)methyl)benzofuran-2-yl)methyl)-*N*-(phenylsulfonyl)benzenesulfonamide (3p)**

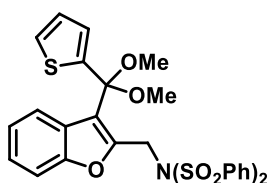

Yellow oil, 35 mg, 30%;  $^1\text{H}$  NMR (400 MHz,  $\text{CDCl}_3$ ) ( $\delta$ , ppm) 8.07 (d,  $J = 8.0$  Hz, 4H), 7.63 – 7.59 (m, 2H), 7.53 – 7.45 (m, 6H), 7.20 (d,  $J = 3.6$  Hz, 1H), 7.15 – 7.11 (m, 1H), 7.09 – 7.05 (m, 1H), 6.99 (d,  $J = 8.0$  Hz, 1H), 6.97 – 6.94 (m, 1H), 5.50 (s, 2H), 3.22 (s, 6H).  $^{13}\text{C}$  NMR (100 MHz,  $\text{CDCl}_3$ ) ( $\delta$ , ppm) 153.7, 149.0, 144.6, 139.7, 133.9, 128.9, 128.8, 127.1, 126.5, 126.4, 125.7, 124.3, 123.1, 121.4, 117.8, 111.0, 101.0, 49.6, 45.4. IR (KBr,  $\nu$ ,  $\text{cm}^{-1}$ ) 1608, 1361, 1169, 1084, 907, 750, 685. HR-MS (ESI)  $m/z$  calcd for  $\text{C}_{28}\text{H}_{25}\text{NNaO}_7\text{S}_3$   $[\text{M}+\text{Na}]^+$  606.0691, found 606.0670.

**(Z)-N-((3-(1-Methoxy-2,2-dimethylpropylidene)-2,3-dihydrobenzofuran-2-yl)methyl)-N-(phenylsulfonyl)benzenesulfonamide (3r)**

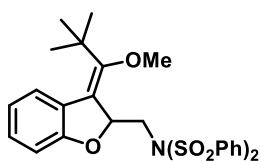

White solid, 36 mg, 34%; m.p. 129-130 °C; <sup>1</sup>H NMR (400 MHz, CDCl<sub>3</sub>) (δ, ppm) 8.12 (d, *J* = 8.0 Hz, 4H), 7.61 – 7.57 (m, 2H), 7.52 – 7.47 (m, 4H), 7.33 (d, *J* = 7.6 Hz, 1H), 7.17 – 7.13 (m, 1H), 6.96 – 6.91 (m, 2H), 5.49 – 5.44 (m, 1H), 4.15 – 4.08 (m, 1H), 4.05 – 3.99 (m, 1H), 3.27 (s, 3H), 1.33 (s, 9H). <sup>13</sup>C NMR (100 MHz, CDCl<sub>3</sub>) (δ, ppm) 157.3, 139.4, 133.9, 133.3, 128.9, 128.8, 122.5, 116.8, 115.8, 103.3, 75.0, 54.9, 50.6, 31.1, 28.3. IR (KBr, ν, cm<sup>-1</sup>) 1600, 1449, 1357, 1232, 1171, 1084, 887, 774, 721. HR-MS (ESI) *m/z* calcd for C<sub>27</sub>H<sub>29</sub>NNaO<sub>6</sub>S<sub>2</sub> [M+Na]<sup>+</sup> 550.1334, found 550.1351.

**N-((3-(Dimethoxy(*p*-tolyl)methyl)-5-methylbenzofuran-2-yl)methyl)-N-(phenylsulfonyl)benzenesulfonamide (3s)**

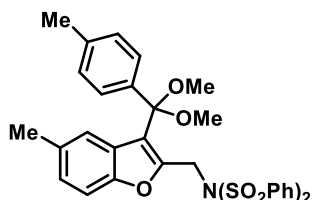

White solid, 67 mg, 55%; m.p. 130-131 °C; <sup>1</sup>H NMR (400 MHz, CDCl<sub>3</sub>) (δ, ppm) 8.00 (d, *J* = 7.6 Hz, 4H), 7.77 (d, *J* = 8.0 Hz, 2H), 7.62 – 7.57 (m, 2H), 7.50 – 7.46 (m, 4H), 7.30 (d, *J* = 7.6 Hz, 2H), 7.13 – 7.06 (m, 3H), 5.24 (s, 2H), 3.49 (s, 6H), 2.46 (s, 3H), 2.34 (s, 3H). <sup>13</sup>C NMR (100 MHz, CDCl<sub>3</sub>) (δ, ppm) 152.1, 148.8, 139.7, 137.9, 137.7, 133.8, 132.2, 128.8, 128.7, 127.0, 126.7, 125.4, 121.1, 117.8, 110.4, 102.1, 49.2, 45.5, 21.6, 21.3. IR (KBr, ν, cm<sup>-1</sup>) 1607, 1378, 1255 1169, 1084, 908, 774, 720. HR-MS (ESI) *m/z* calcd for C<sub>32</sub>H<sub>31</sub>NNaO<sub>7</sub>S<sub>2</sub> [M+Na]<sup>+</sup> 628.1440, found 628.1419.

**N-((5-Chloro-3-(dimethoxy(*p*-tolyl)methyl)benzofuran-2-yl)methyl)-N-(phenylsulfonyl)benzenesulfonamide (3t)**

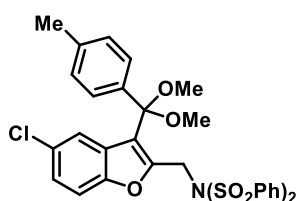

White solid, 58 mg, 46%; m.p. 129-130 °C; <sup>1</sup>H NMR (400 MHz, CDCl<sub>3</sub>) (δ, ppm) 8.00 (d, *J* = 7.6 Hz, 4H), 7.74 (d, *J* = 7.8 Hz, 2H), 7.63 – 7.59 (m, 2H), 7.51 – 7.46 (m, 5H), 7.32 (d, *J* = 8.0 Hz, 2H), 7.23 (d, *J* = 1.6 Hz, 1H), 7.15 (d, *J* = 8.8 Hz, 1H), 5.25 (s, 2H), 3.49 (s, 6H), 2.47 (s, 3H). <sup>13</sup>C NMR (100 MHz, CDCl<sub>3</sub>) (δ, ppm) 152.0, 150.2, 139.6, 138.2, 137.2, 133.9, 129.0, 128.9, 128.7, 128.5, 128.0, 126.9, 124.4, 121.0, 118.0, 111.9, 101.9, 49.3, 45.3, 21.2. IR (KBr, ν, cm<sup>-1</sup>) 1609, 1360, 1258, 1169, 1084, 932, 774, 720. HR-MS (ESI) *m/z* calcd for C<sub>31</sub>H<sub>28</sub>ClNNaO<sub>7</sub>S<sub>2</sub> [M+Na]<sup>+</sup> 648.0893, found 648.0875.

**N-((3-((4-Bromophenyl)dimethoxymethyl)benzofuran-2-yl)methyl)-4-methyl-N-tosylbenzenesulfonamide (3u)**

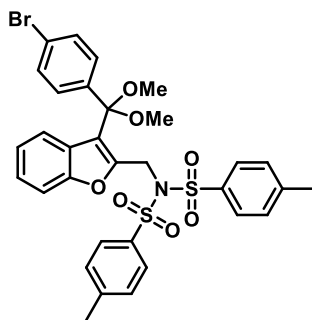

White solid, 88 mg, 64%; m.p. 126-127 °C;  $^1\text{H}$  NMR (400 MHz,  $\text{CDCl}_3$ ) ( $\delta$ , ppm) 7.93 (d,  $J = 8.0$  Hz, 4H), 7.61 (d,  $J = 8.4$  Hz, 2H), 7.46 (d,  $J = 8.4$  Hz, 2H), 7.29 (d,  $J = 8.0$  Hz, 3H), 7.24 (s, 2H), 7.14 – 7.10 (m, 1H), 7.05 – 7.00 (m, 2H), 5.50 (s, 2H), 3.15 (s, 6H), 2.41 (s, 6H).  $^{13}\text{C}$  NMR (100 MHz,  $\text{CDCl}_3$ ) ( $\delta$ , ppm) 153.7, 149.2, 144.9, 139.7, 136.8, 131.3, 129.6, 129.4, 129.1, 128.7, 126.3, 124.2, 122.9, 122.5, 121.1, 117.3, 111.0, 101.8, 49.3, 45.2, 27.0, 21.7. IR (KBr,  $\nu$ ,  $\text{cm}^{-1}$ ) 1609, 1359, 1166, 1084, 774. HR-MS (ESI)  $m/z$  calcd for  $\text{C}_{32}\text{H}_{30}\text{BrNNaO}_7\text{S}_2$  [ $\text{M}+\text{Na}$ ] $^+$  706.0545, found 706.0523.

***N-((3-((4-Bromophenyl)dimethoxymethyl)benzofuran-2-yl)methyl)-4-methoxy-N-((4-methoxyphenyl)sulfonyl)benzenesulfonamide (3v)***

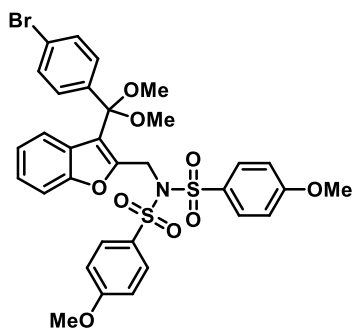

White solid, 47 mg, 33%; m.p. 146-147 °C;  $^1\text{H}$  NMR (400 MHz,  $\text{CDCl}_3$ ) ( $\delta$ , ppm) 7.97 (d,  $J = 8.8$  Hz, 4H), 7.62 (d,  $J = 8.0$  Hz, 2H), 7.47 (d,  $J = 8.4$  Hz, 2H), 7.29 (d,  $J = 7.2$  Hz, 1H), 7.15 – 7.10 (m, 1H), 7.06 – 7.02 (m, 2H), 6.90 (d,  $J = 8.8$  Hz, 4H), 5.48 (s, 2H), 3.84 (s, 6H), 3.14 (s, 6H).  $^{13}\text{C}$  NMR (100 MHz,  $\text{CDCl}_3$ ) ( $\delta$ , ppm) 163.8, 153.8, 149.4, 139.8, 131.3, 131.2, 131.0, 129.1, 126.4, 124.2, 122.9, 122.5, 121.1, 117.3, 113.9, 111.0, 101.7, 55.8, 49.3, 45.1. IR (KBr,  $\nu$ ,  $\text{cm}^{-1}$ ) 1609, 1359, 1160, 1085, 774. HR-MS (ESI)  $m/z$  calcd for  $\text{C}_{32}\text{H}_{30}\text{BrNNaO}_9\text{S}_2$  [ $\text{M}+\text{Na}$ ] $^+$  738.0443, found 738.0418.

***N-((3-((4-Bromophenyl)dimethoxymethyl)benzofuran-2-yl)methyl)-4-chloro-N-((4-chlorophenyl)sulfonyl)benzenesulfonamide (3w)***

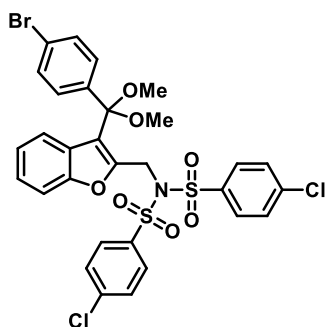

White solid, 46 mg, 32%; m.p. 154-155 °C;  $^1\text{H}$  NMR (400 MHz,  $\text{CDCl}_3$ ) ( $\delta$ , ppm) 7.96 (d,  $J = 8.4$  Hz, 4H), 7.60 (d,  $J = 8.4$  Hz, 2H), 7.47 (d,  $J = 8.4$  Hz, 2H), 7.43 (d,  $J = 8.4$  Hz, 4H), 7.32 (d,  $J = 7.6$  Hz, 1H), 7.19 – 7.15 (m, 1H), 7.09 – 7.05 (m, 1H), 7.00 (d,  $J = 8.0$  Hz, 1H), 5.50 (s, 2H), 3.15 (s, 6H).  $^{13}\text{C}$  NMR (100 MHz,  $\text{CDCl}_3$ ) ( $\delta$ , ppm) 153.7, 148.4, 140.8, 139.6, 137.9, 131.4, 130.1, 129.2, 129.0, 126.1, 124.7, 123.2, 122.6, 121.2, 117.9,

110.9, 101.7, 49.4, 45.5. IR (KBr,  $\nu$ ,  $\text{cm}^{-1}$ ) 1617, 1356, 1281, 1168, 1085, 1047, 773. HR-MS (ESI)  $m/z$  calcd for  $\text{C}_{30}\text{H}_{24}\text{Cl}_2\text{NNaO}_7\text{S}_2$   $[\text{M}+\text{Na}]^+$  745.9452, found 745.9468.

**4-Bromo-N-((3-((4-bromophenyl)dimethoxymethyl)benzofuran-2-yl)methyl)-N-((4-bromophenyl)sulfonyl)benzenesulfonamide (3x)**

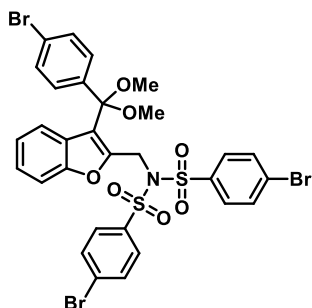

White solid, 64 mg, 39%; m.p. 117-118 °C;  $^1\text{H}$  NMR (400 MHz,  $\text{CDCl}_3$ ) ( $\delta$ , ppm) 7.87 (d,  $J = 8.0$  Hz, 4H), 7.62 – 7.58 (m, 6H), 7.48 (d,  $J = 8.0$  Hz, 2H), 7.32 (d,  $J = 8.0$  Hz, 1H), 7.20 – 7.16 (m, 1H), 7.09 – 7.05 (m, 1H), 7.00 (d,  $J = 8.0$  Hz, 1H), 5.50 (s, 2H), 3.15 (s, 6H).  $^{13}\text{C}$  NMR (100 MHz,  $\text{CDCl}_3$ ) ( $\delta$ , ppm) 153.6, 148.3, 139.6, 138.4, 132.2, 131.4, 130.1, 129.5, 128.9, 126.1, 124.8, 123.2, 122.6, 121.2, 117.9, 110.9, 101.7, 49.4, 45.6. IR (KBr,  $\nu$ ,  $\text{cm}^{-1}$ ) 1635, 1381, 1279, 1169, 1083, 773. HR-MS (ESI)  $m/z$  calcd for  $\text{C}_{30}\text{H}_{24}\text{Br}_3\text{NNaO}_7\text{S}_2$   $[\text{M}+\text{Na}]^+$  833.8442, found 833.8449.

**N-((3-((4-Bromophenyl)dimethoxymethyl)benzofuran-2-yl)methyl)-4-methyl-N-(phenylsulfonyl)benzenesulfonamide (3y)**

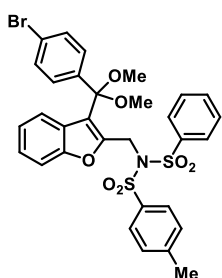

White solid, 62 mg, 41%; m.p. 105-106 °C;  $^1\text{H}$  NMR (400 MHz,  $\text{DMSO}-d_6$ ) ( $\delta$ , ppm) 7.99 (d,  $J = 7.6$  Hz, 2H), 7.84 (d,  $J = 8.0$  Hz, 2H), 7.80 – 7.77 (m, 1H), 7.69 – 7.65 (m, 2H), 7.63 – 7.56 (m, 4H), 7.44 (d,  $J = 8.0$  Hz, 2H), 7.28 (d,  $J = 7.6$  Hz, 1H), 7.22 (d,  $J = 3.6$  Hz, 2H), 7.14 – 7.09 (m, 1H), 5.55 (s, 2H), 3.12 (s, 6H), 2.41 (s, 3H).  $^{13}\text{C}$  NMR (100 MHz,  $\text{DMSO}-d_6$ ) ( $\delta$ , ppm) 153.5, 149.7, 145.9, 140.2, 139.4, 136.3, 135.0, 131.7, 130.3, 129.8, 129.5, 128.6, 128.5, 126.2, 125.1, 123.7, 122.2, 121.1, 117.3, 111.4, 101.7, 49.6, 45.2, 21.6. IR (KBr,  $\nu$ ,  $\text{cm}^{-1}$ ) 1655, 1378, 1280, 1167, 1051, 822, 753, 550. HR-MS (ESI)  $m/z$  calcd for  $\text{C}_{31}\text{H}_{28}\text{BrNNaO}_7\text{S}_2$   $[\text{M}+\text{Na}]^+$  692.0388, found 692.0402.

**4-Bromo-N-((3-((4-bromophenyl)dimethoxymethyl)benzofuran-2-yl)methyl)-N-tosylbenzenesulfonamide (3z)**

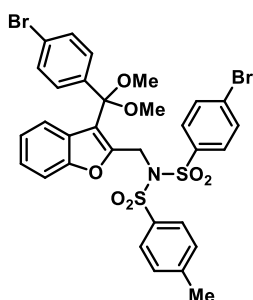

White solid, 60 mg, 40%; m.p. 110-111 °C; <sup>1</sup>H NMR (400 MHz, DMSO-*d*<sub>6</sub>) (δ, ppm) 7.91 (s, 3H), 7.86 (d, *J* = 8.0 Hz, 2H), 7.62 – 7.54 (m, 5H), 7.44 (d, *J* = 7.6 Hz, 2H), 7.30 (d, *J* = 7.6 Hz, 1H), 7.23 (d, *J* = 4.0 Hz, 2H), 7.14 – 7.10 (m, 1H), 5.57 (s, 2H), 3.12 (s, 6H), 2.40 (s, 3H). <sup>13</sup>C NMR (100 MHz, DMSO-*d*<sub>6</sub>) (δ, ppm) 153.5, 149.4, 146.1, 140.2, 138.7, 136.1, 133.0, 131.7, 130.4, 130.3, 129.5, 129.2, 128.6, 126.1, 125.1, 123.7, 122.2, 121.2, 117.5, 111.4, 101.7, 54.9, 49.6, 45.3, 21.7. IR (KBr, ν, cm<sup>-1</sup>) 1588, 1450, 1377, 1167, 1051, 816, 750. HR-MS (ESI) *m/z* calcd for C<sub>31</sub>H<sub>27</sub>Br<sub>2</sub>NNaO<sub>7</sub>S<sub>2</sub> [M+Na]<sup>+</sup> 769.9493, found 769.9504.

*N*-((3-((4-Bromophenyl)diethoxymethyl)benzofuran-2-yl)methyl)-*N*-(phenylsulfonyl)benzenesulfonamide (3aa)

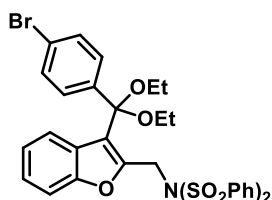

White solid, 115 mg, 84%; m.p. 99-100 °C; <sup>1</sup>H NMR (400 MHz, CDCl<sub>3</sub>) (δ, ppm) 8.07 (d, *J* = 8.0 Hz, 4H), 7.65 – 7.61 (m, 4H), 7.50 (d, *J* = 7.6 Hz, 3H), 7.48 – 7.43 (m, 3H), 7.29 (d, *J* = 8.0 Hz, 1H), 7.12 – 7.07 (m, 1H), 7.03 – 6.99 (m, 1H), 6.92 (d, *J* = 8.4 Hz, 1H), 5.58 (s, 2H), 3.39 – 3.33 (m, 4H), 1.20 – 1.15 (m, 6H). <sup>13</sup>C NMR (100 MHz, CDCl<sub>3</sub>) (δ, ppm) 153.6, 148.8, 140.6, 139.7, 133.9, 131.2, 129.0, 128.9, 128.7, 126.5, 124.1, 122.9, 122.3, 121.1, 117.8, 111.0, 101.0, 57.4, 45.6, 15.2. IR (KBr, ν, cm<sup>-1</sup>) 1609, 1359, 1169, 1084, 774. HR-MS (ESI) *m/z* calcd for C<sub>32</sub>H<sub>30</sub>BrNNaO<sub>7</sub>S<sub>2</sub> [M+Na]<sup>+</sup> 706.0545, found 706.0518.

*N*-((3-((4-Bromophenyl)dipropoxymethyl)benzofuran-2-yl)methyl)-*N*-(phenylsulfonyl)benzenesulfonamide (3ab)

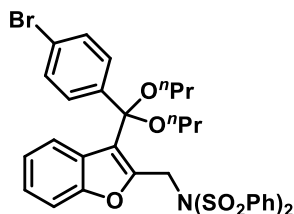

White solid, 77 mg, 54%; m.p. 92-93 °C; <sup>1</sup>H NMR (400 MHz, CDCl<sub>3</sub>) (δ, ppm) 8.04 (d, *J* = 8.0 Hz, 4H), 7.72 (d, *J* = 7.6 Hz, 2H), 7.66 – 7.61 (m, 4H), 7.55 – 7.49 (m, 4H), 7.32 – 7.26 (m, 2H), 7.20 – 7.14 (m, 2H), 5.31 (s, 2H), 3.65 – 3.57 (m, 4H), 1.63 – 1.56 (m, 4H), 0.99 – 0.90 (m, 6H). <sup>13</sup>C NMR (100 MHz, CDCl<sub>3</sub>) (δ, ppm) 153.5, 148.7, 140.6, 139.7, 133.9, 131.2, 128.9, 128.7, 126.5, 124.1, 122.9, 122.3, 121.1, 117.8, 111.0, 100.7, 63.3, 45.8, 23.0, 11.1. IR (KBr, ν, cm<sup>-1</sup>) 1609, 1357, 1248, 1169, 1083, 934, 774, 720. HR-MS (ESI) *m/z* calcd for C<sub>34</sub>H<sub>34</sub>BrNNaO<sub>7</sub>S<sub>2</sub> [M+Na]<sup>+</sup> 734.0858, found 734.0830.

*N*-((3-(4-Methylbenzoyl)benzofuran-2-yl)methyl)-*N*-(phenylsulfonyl)benzenesulfonamide (4a)

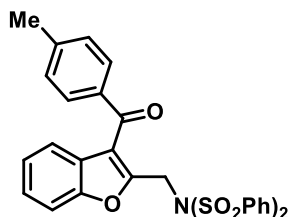

White solid, 61 mg, 56%; m.p. 172-173 °C; <sup>1</sup>H NMR (400 MHz, CDCl<sub>3</sub>) (δ, ppm) 8.03 (d, *J* = 8.0 Hz, 4H), 7.76 (d, *J* = 8.0 Hz, 2H), 7.63 – 7.58 (m, 2H), 7.51 – 7.46 (m, 4H), 7.32 – 7.26 (m, 3H), 7.23 (d, *J* = 7.6 Hz, 2H), 7.19 – 7.15 (m, 1H), 5.30 (s, 2H), 2.46 (s, 3H). <sup>13</sup>C NMR (100 MHz, CDCl<sub>3</sub>) (δ, ppm) 191.0, 156.5, 153.8,

144.2, 139.3, 136.2, 134.0, 129.8, 129.4, 129.0, 128.6, 126.0, 125.4, 123.9, 122.0, 119.8, 111.4, 44.1, 21.9. IR (KBr,  $\nu$ ,  $\text{cm}^{-1}$ ) 1607, 1362, 1265, 1170, 1084, 907, 774, 686. HR-MS (ESI)  $m/z$  calcd for  $\text{C}_{29}\text{H}_{23}\text{NNaO}_6\text{S}_2$   $[\text{M}+\text{Na}]^+$  568.0864, found 568.0844.

*N*-((3-(3-Methylbenzoyl)benzofuran-2-yl)methyl)-*N*-(phenylsulfonyl)benzenesulfonamide (**4b**)

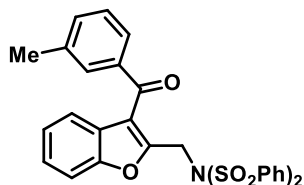

White solid, 55 mg, 50%; m.p. 97-98 °C;  $^1\text{H}$  NMR (400 MHz,  $\text{CDCl}_3$ ) ( $\delta$ , ppm) 8.03 (d,  $J = 8.0$  Hz, 4H), 7.69 (s, 1H), 7.63 – 7.58 (m, 3H), 7.53 – 7.47 (m, 4H), 7.45 (d,  $J = 7.6$  Hz, 1H), 7.40 – 7.35 (m, 1H), 7.29 (d,  $J = 8.0$  Hz, 1H), 7.23 (d,  $J = 8.0$  Hz, 2H), 7.19 – 7.14 (m, 1H), 5.31 (s, 2H), 2.42 (s, 3H).  $^{13}\text{C}$  NMR (100 MHz,  $\text{CDCl}_3$ ) ( $\delta$ , ppm) 191.5, 156.8, 153.8, 139.4, 139.0, 138.6, 134.0, 129.8, 129.0, 128.6, 128.5, 126.8, 126.0, 125.4, 124.0, 122.0, 119.6, 111.4, 44.2, 21.5. IR (KBr,  $\nu$ ,  $\text{cm}^{-1}$ ) 1608, 1367, 1265, 1170, 1084, 896, 774. HR-MS (ESI)  $m/z$  calcd for  $\text{C}_{29}\text{H}_{23}\text{NNaO}_6\text{S}_2$   $[\text{M}+\text{Na}]^+$  568.0864, found 568.0881.

*N*-((3-([1,1'-Biphenyl]-4-carbonyl)benzofuran-2-yl)methyl)-*N*-(phenylsulfonyl)benzenesulfonamide (**4c**)

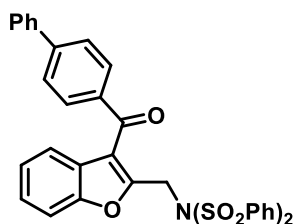

White solid, 89 mg, 73%; m.p. 199-200 °C;  $^1\text{H}$  NMR (400 MHz,  $\text{CDCl}_3$ ) ( $\delta$ , ppm) 8.05 (d,  $J = 8.0$  Hz, 4H), 7.95 (d,  $J = 8.0$  Hz, 2H), 7.73 (d,  $J = 7.6$  Hz, 2H), 7.67 (d,  $J = 8.0$  Hz, 2H), 7.64 – 7.58 (m, 2H), 7.53 – 7.47 (m, 6H), 7.45 – 7.40 (m, 1H), 7.31 (d,  $J = 6.4$  Hz, 2H), 7.26 (d,  $J = 3.6$  Hz, 1H), 7.22 – 7.16 (m, 1H), 5.35 (s, 2H).  $^{13}\text{C}$  NMR (100 MHz,  $\text{CDCl}_3$ ) ( $\delta$ , ppm) 190.8, 156.8, 153.8, 146.0, 139.9, 139.4, 137.5, 134.0, 130.2, 129.1, 129.0, 128.6, 128.4, 127.4, 127.3, 126.0, 125.5, 124.0, 122.0, 119.7, 111.5, 44.1. IR (KBr,  $\nu$ ,  $\text{cm}^{-1}$ ) 1605, 1380, 1244, 1170, 1084, 908, 800, 743. HR-MS (ESI)  $m/z$  calcd for  $\text{C}_{34}\text{H}_{25}\text{NNaO}_6\text{S}_2$   $[\text{M}+\text{Na}]^+$  630.1021, found 630.1037.

*N*-((3-Benzoylbenzofuran-2-yl)methyl)-*N*-(phenylsulfonyl)benzenesulfonamide (**4d**)

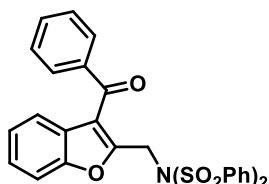

White solid, 44 mg, 41%; m.p. 190-191 °C;  $^1\text{H}$  NMR (400 MHz,  $\text{CDCl}_3$ ) ( $\delta$ , ppm) 8.03 (d,  $J = 8.0$  Hz, 4H), 7.85 (d,  $J = 8.0$  Hz, 2H), 7.65 – 7.59 (m, 3H), 7.53 – 7.47 (m, 6H), 7.29 (d,  $J = 8.0$  Hz, 1H), 7.23 (d,  $J = 8.0$  Hz, 1H), 7.21 – 7.14 (m, 2H), 5.31 (s, 2H).  $^{13}\text{C}$  NMR (100 MHz,  $\text{CDCl}_3$ ) ( $\delta$ , ppm) 191.3, 156.9, 153.7, 139.3, 138.8, 134.0, 133.2, 129.4, 128.9, 128.7, 128.6, 125.9, 125.4, 123.9, 121.9, 119.5, 111.4, 44.1. IR (KBr,  $\nu$ ,  $\text{cm}^{-1}$ ) 1608, 1379, 1242, 1170, 1084, 904, 750, 720. HR-MS (ESI)  $m/z$  calcd for  $\text{C}_{28}\text{H}_{21}\text{NNaO}_6\text{S}_2$   $[\text{M}+\text{Na}]^+$  554.0708, found 554.0723.

*N*-((3-(3-Chlorobenzoyl)benzofuran-2-yl)methyl)-*N*-(phenylsulfonyl)benzenesulfonamide (**4e**)



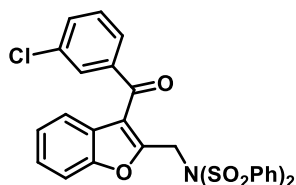

White solid, 51 mg, 45%; m.p. 128-129 °C; <sup>1</sup>H NMR (400 MHz, CDCl<sub>3</sub>) (δ, ppm) 8.05 (d, *J* = 8.0 Hz, 4H), 7.84 (s, 1H), 7.69 (d, *J* = 8.0 Hz, 1H), 7.65 – 7.59 (m, 3H), 7.54 – 7.49 (m, 4H), 7.45 – 7.41 (m, 1H), 7.32 – 7.26 (m, 2H), 7.21 – 7.17 (m, 1H), 7.15 (d, *J* = 7.6 Hz, 1H), 5.32 (s, 2H). <sup>13</sup>C NMR (100 MHz, CDCl<sub>3</sub>) (δ, ppm) 189.9, 157.5, 157.5, 153.7, 140.3, 139.3, 134.1, 133.1, 130.0, 129.2, 129.0, 128.6, 127.7, 125.6, 124.1, 121.6, 111.5, 43.9. IR (KBr, ν, cm<sup>-1</sup>) 1608, 1362, 1169, 1084, 774. HR-MS (ESI) *m/z* calcd for C<sub>28</sub>H<sub>20</sub>ClNNaO<sub>6</sub>S<sub>2</sub> [M+Na]<sup>+</sup> 588.0318, found 588.0340.

***N*-((5-Methyl-3-(4-methylbenzoyl)benzofuran-2-yl)methyl)-*N*-(phenylsulfonyl)benzenesulfonamide (4f)**

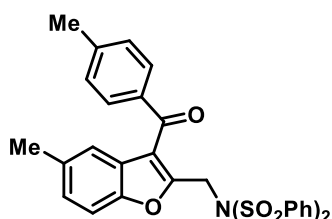

White solid, 66 mg, 59%; m.p. 169-170 °C; <sup>1</sup>H NMR (400 MHz, CDCl<sub>3</sub>) (δ, ppm) 8.00 (d, *J* = 8.4 Hz, 4H), 7.77 (d, *J* = 7.6 Hz, 2H), 7.62 – 7.57 (m, 2H), 7.50 – 7.45 (m, 4H), 7.30 (d, *J* = 8.0 Hz, 2H), 7.12 (d, *J* = 8.4 Hz, 1H), 7.08 (d, *J* = 8.4 Hz, 2H), 5.25 (s, 2H), 2.46 (s, 3H), 2.34 (s, 3H). <sup>13</sup>C NMR (100 MHz, CDCl<sub>3</sub>) (δ, ppm) 191.0, 156.3, 152.3, 144.1, 139.4, 136.2, 134.0, 133.6, 129.8, 129.4, 128.9, 128.6, 126.7, 126.1, 121.7, 119.6, 110.9, 44.2, 21.9, 21.5. IR (KBr, ν, cm<sup>-1</sup>) 1608, 1363, 1169, 1084, 774. HR-MS (ESI) *m/z* calcd for C<sub>30</sub>H<sub>25</sub>NNaO<sub>6</sub>S<sub>2</sub> [M+Na]<sup>+</sup> 582.1021, found 582.1046.

***N*-((3-(Dimethoxy(*p*-tolyl)methyl)benzofuran-2-yl)methyl)benzenesulfonamide (5a)**

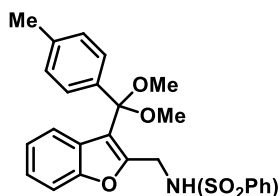

White solid, 35 mg, 78%; m.p. 165-166 °C; <sup>1</sup>H NMR (400 MHz, DMSO-*d*<sub>6</sub>) (δ, ppm) 8.30 – 8.24 (m, 1H), 7.83 (d, *J* = 9.6 Hz, 2H), 7.59 – 7.51 (m, 3H), 7.38 (d, *J* = 8.0 Hz, 2H), 7.33 (d, *J* = 8.0 Hz, 1H), 7.28 (d, *J* = 7.6 Hz, 1H), 7.19 – 7.14 (m, 1H), 7.08 (d, *J* = 8.4 Hz, 2H), 7.07 – 7.02 (m, 1H), 4.52 (d, *J* = 6.0 Hz, 2H), 2.94 (s, 6H), 2.22 (s, 3H). <sup>13</sup>C NMR (100 MHz, DMSO-*d*<sub>6</sub>) (δ, ppm) 153.7, 151.3, 141.1, 137.9, 137.8, 132.8, 129.5, 129.1, 127.1, 127.1, 126.5, 124.9, 123.3, 121.5, 118.3, 111.3, 101.9, 49.2, 21.2. IR (KBr, ν, cm<sup>-1</sup>) 1447, 1282, 1169, 1052, 750. HR-MS (ESI) *m/z* calcd for C<sub>25</sub>H<sub>25</sub>NNaO<sub>5</sub>S [M+Na]<sup>+</sup> 474.1351, found 474.1360.

***N*-((3-(4-Methylbenzoyl)benzofuran-2-yl)methyl)benzenesulfonamide (6a)**

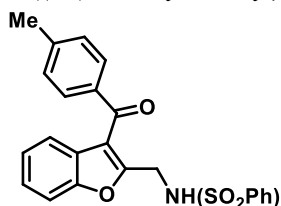

White solid, 14 mg, 70%; m.p. 171-172 °C; <sup>1</sup>H NMR (400 MHz, DMSO-*d*<sub>6</sub>) (δ, ppm) 8.49 – 8.44 (m, 1H), 7.65 – 7.61 (m, 4H), 7.57 – 7.49 (m, 2H), 7.46 – 7.41 (m, 2H), 7.38 (d, *J* = 7.6 Hz, 1H), 7.35 (d, *J* = 7.6 Hz, 3H),

7.29 – 7.24 (m, 1H), 4.22 (d,  $J = 5.6$  Hz, 2H), 2.42 (s, 3H).  $^{13}\text{C}$  NMR (100 MHz, DMSO- $d_6$ ) ( $\delta$ , ppm) 190.4, 158.3, 153.7, 144.3, 140.5, 136.3, 132.8, 129.8, 129.7, 129.4, 126.8, 126.4, 126.0, 124.5, 121.8, 118.3, 111.9, 111.9, 39.2, 21.8. IR (KBr,  $\nu$ ,  $\text{cm}^{-1}$ ) 1644, 1449, 1332, 1170, 1093, 908, 752. HR-MS (ESI)  $m/z$  calcd for  $\text{C}_{23}\text{H}_{19}\text{NNaO}_4\text{S}$   $[\text{M}+\text{Na}]^+$  428.0932, found 428.0946.

## Reference

- [1] J. Sadhan, V. Ajay, K. Rahul and K. Sangit, *Chem. Sci.*, 2017, **8**, 6633.
- [2] X. Dong, R. Sang, Q. Wang, X.-Y. Tang and M. Shi, *Chem. Eur. J.*, 2013, **19**, 16910.
- [3] X. Hu, G. Zhang, L. Nie, T. Kong and A. Lei, *Nat. Commun.*, 2019, **10**, 5467.
- [4] D. Ji, X. He, Y. Xu, Z. Xu, Y. Bian, W. Liu, Q. Zhu and Y. Xu, *Org. Lett.*, 2016, **18**, 4478.

# Copies of NMR Spectra

<sup>1</sup>H spectra of compound 3a:

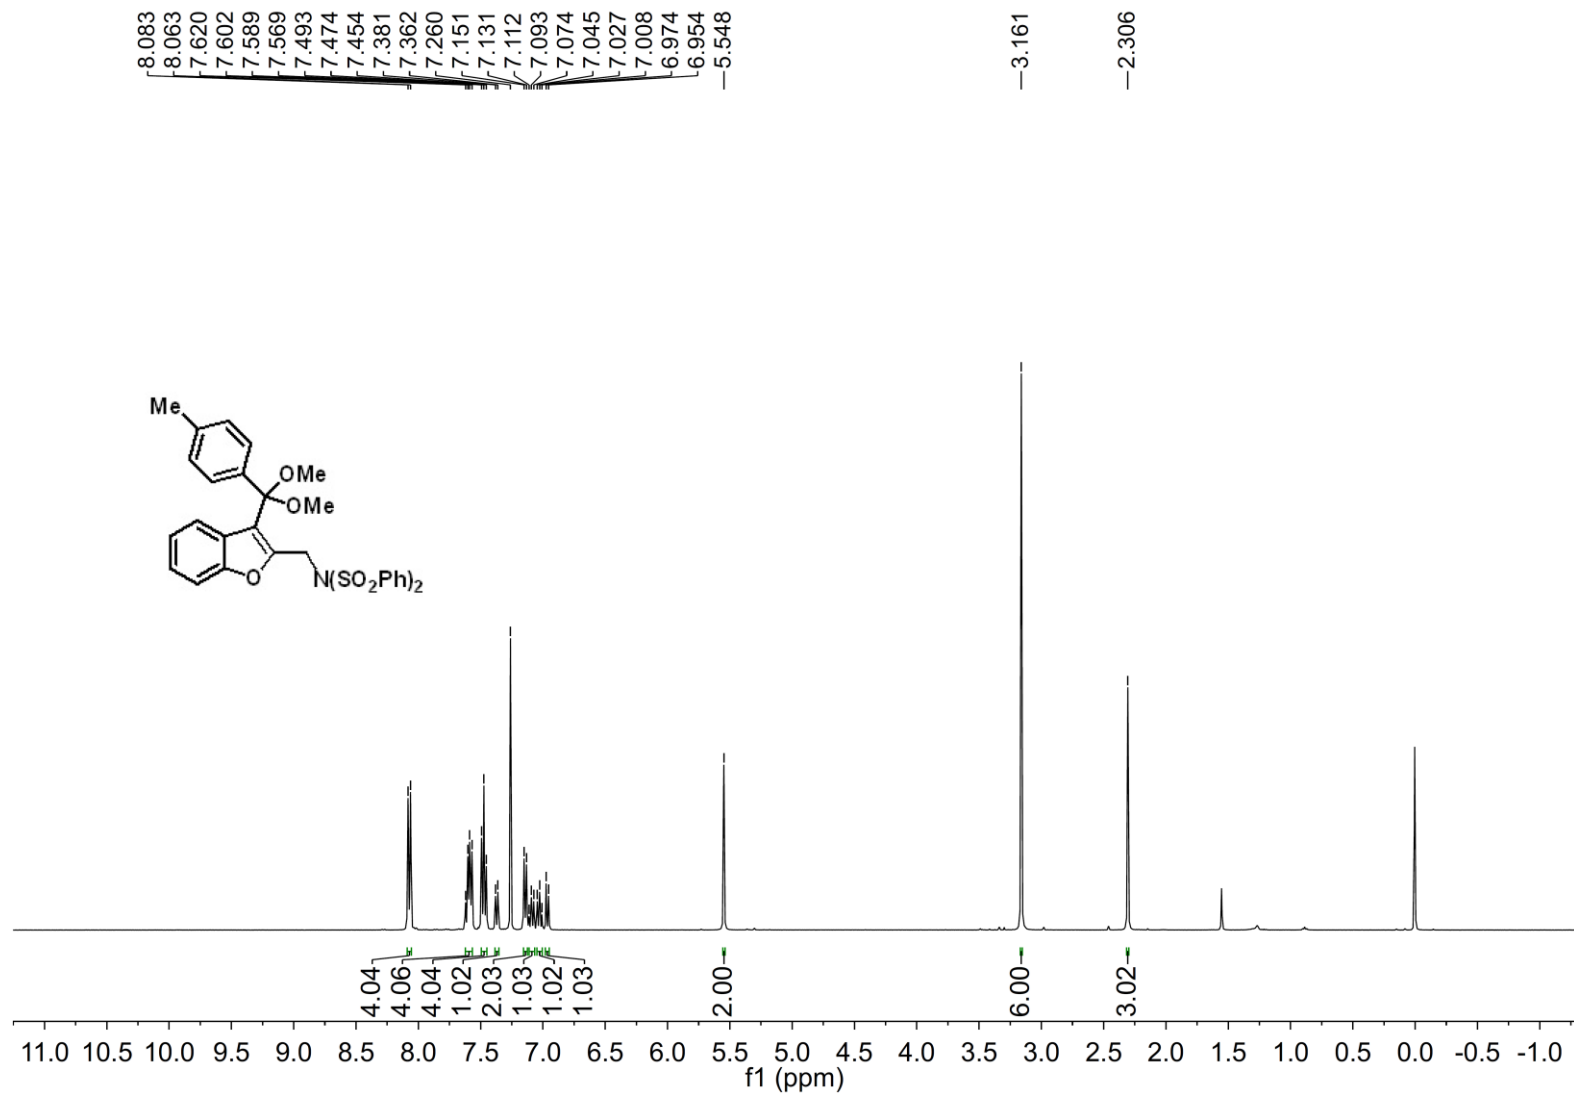

<sup>13</sup>C spectra of compound 3a:

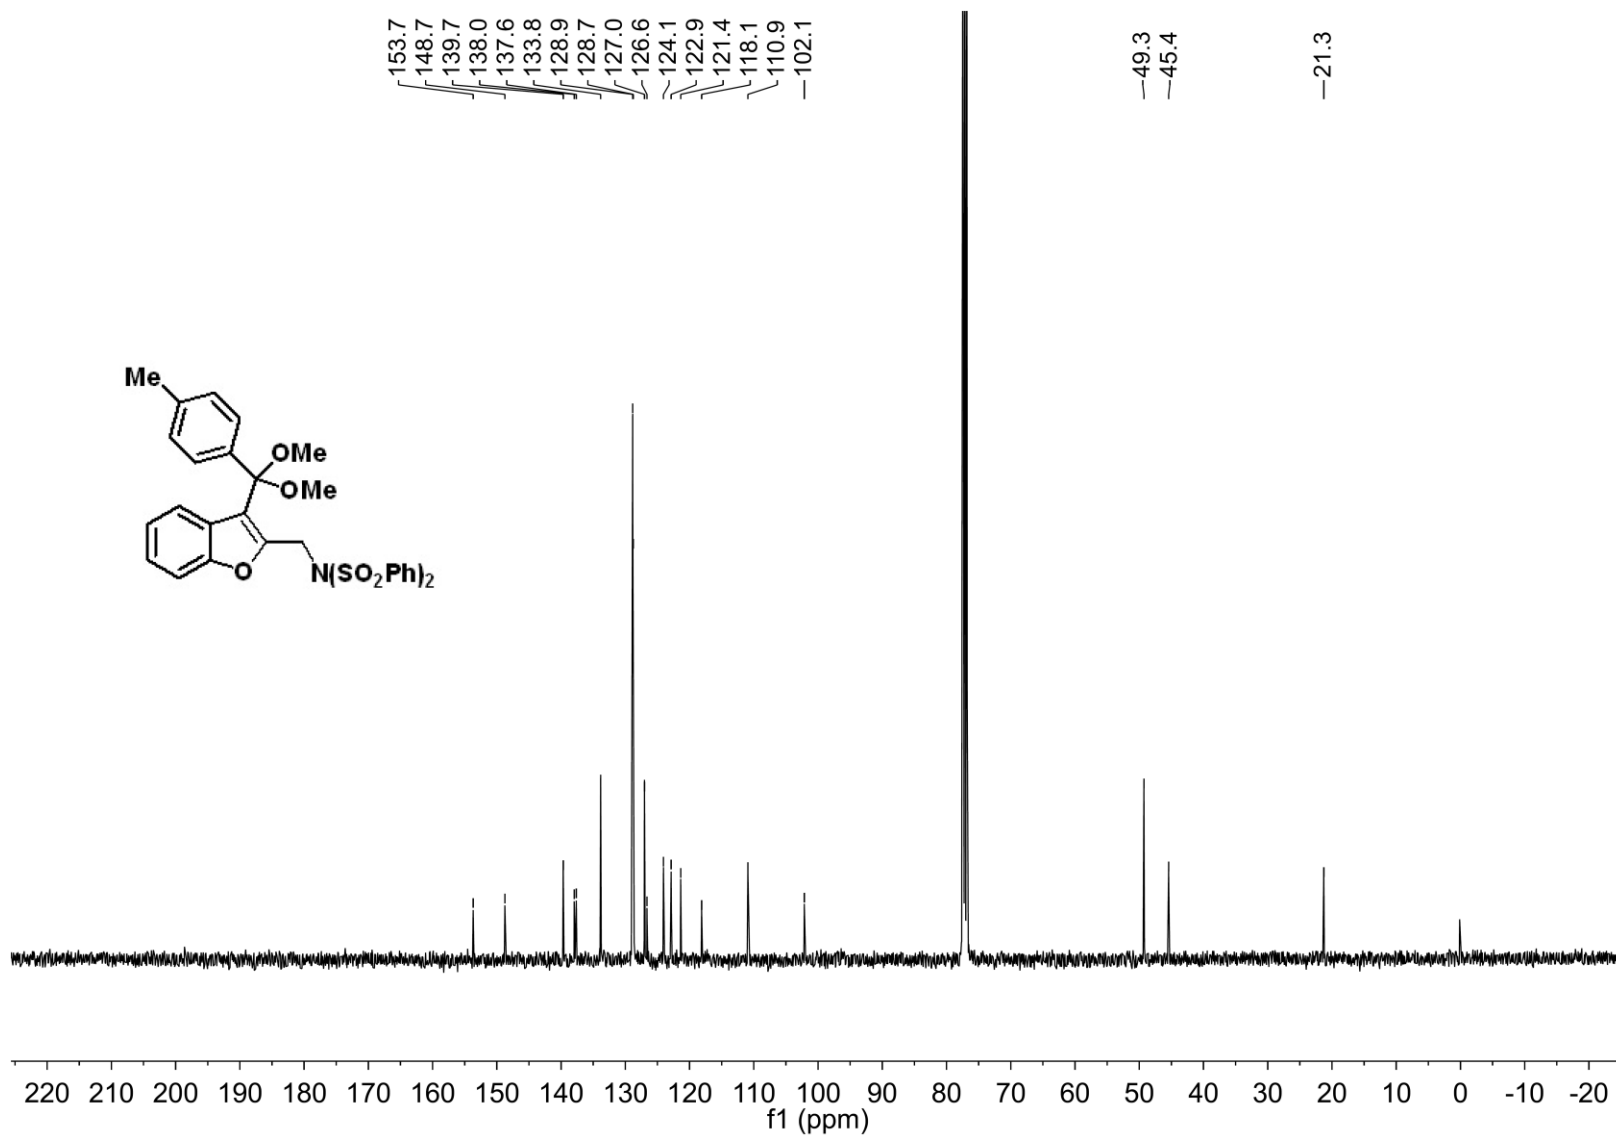

<sup>1</sup>H spectra of compound 3b:

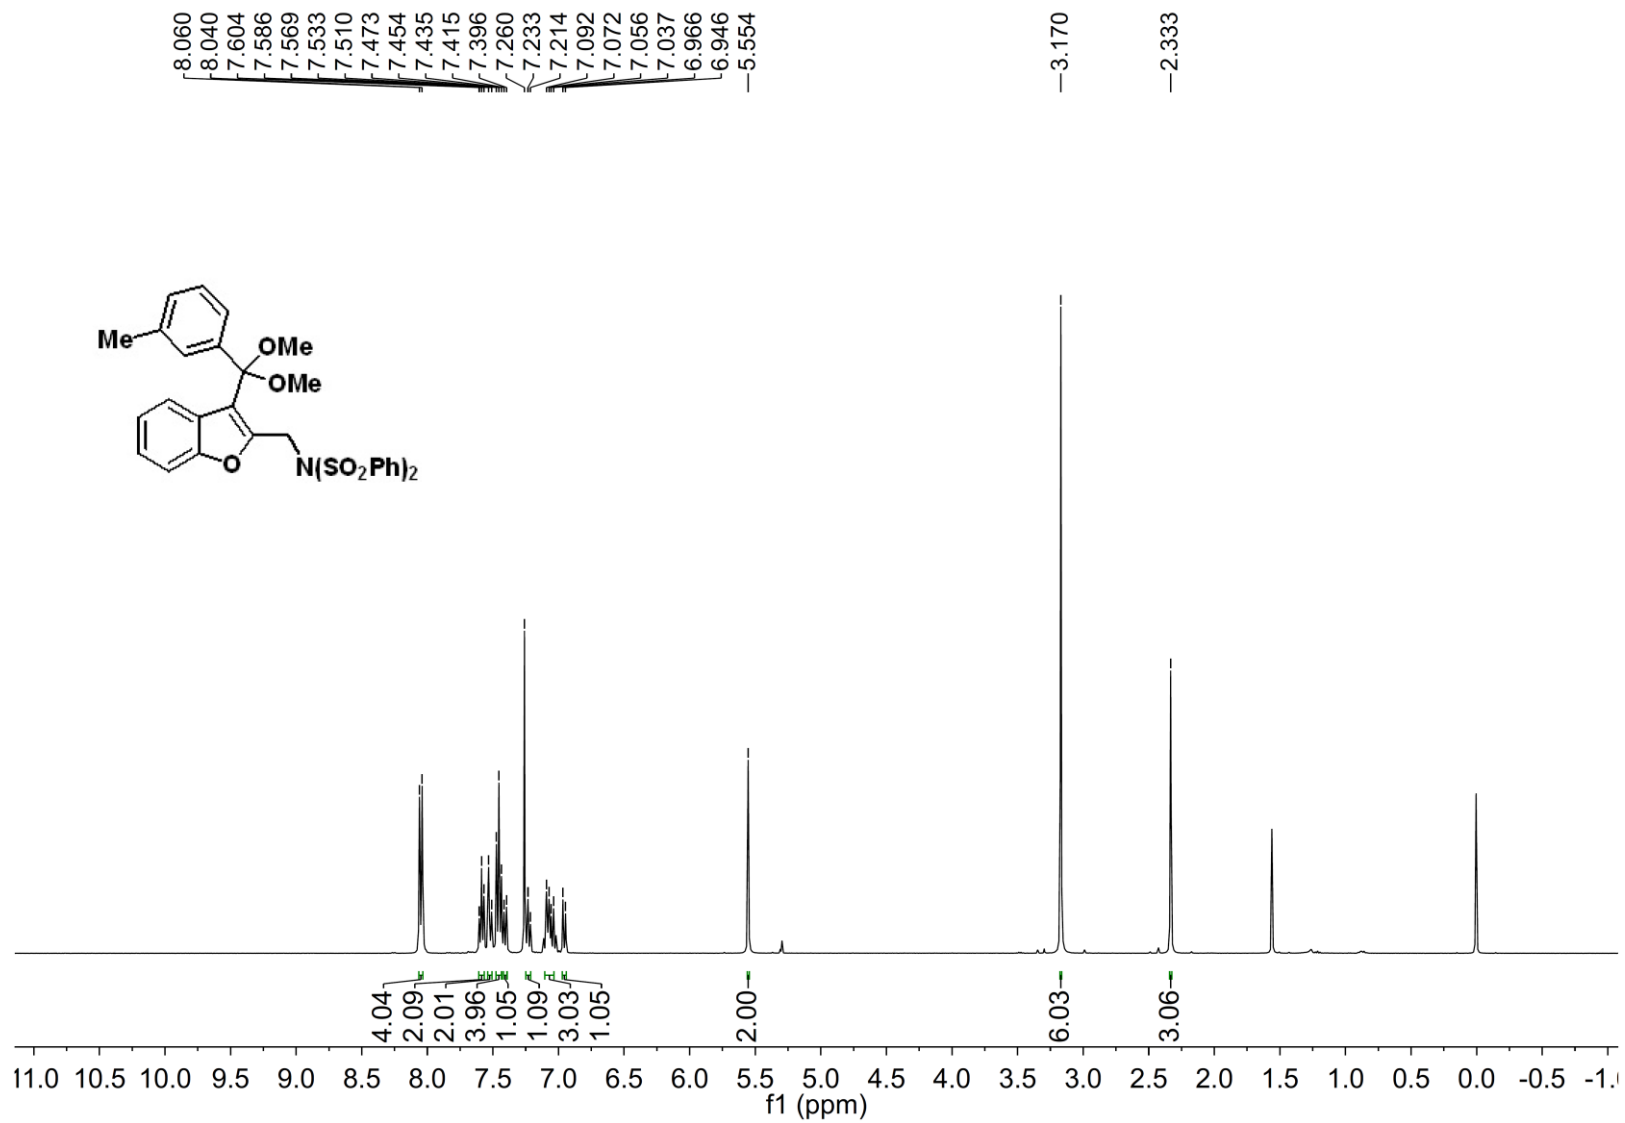

<sup>13</sup>C spectra of compound 3b:

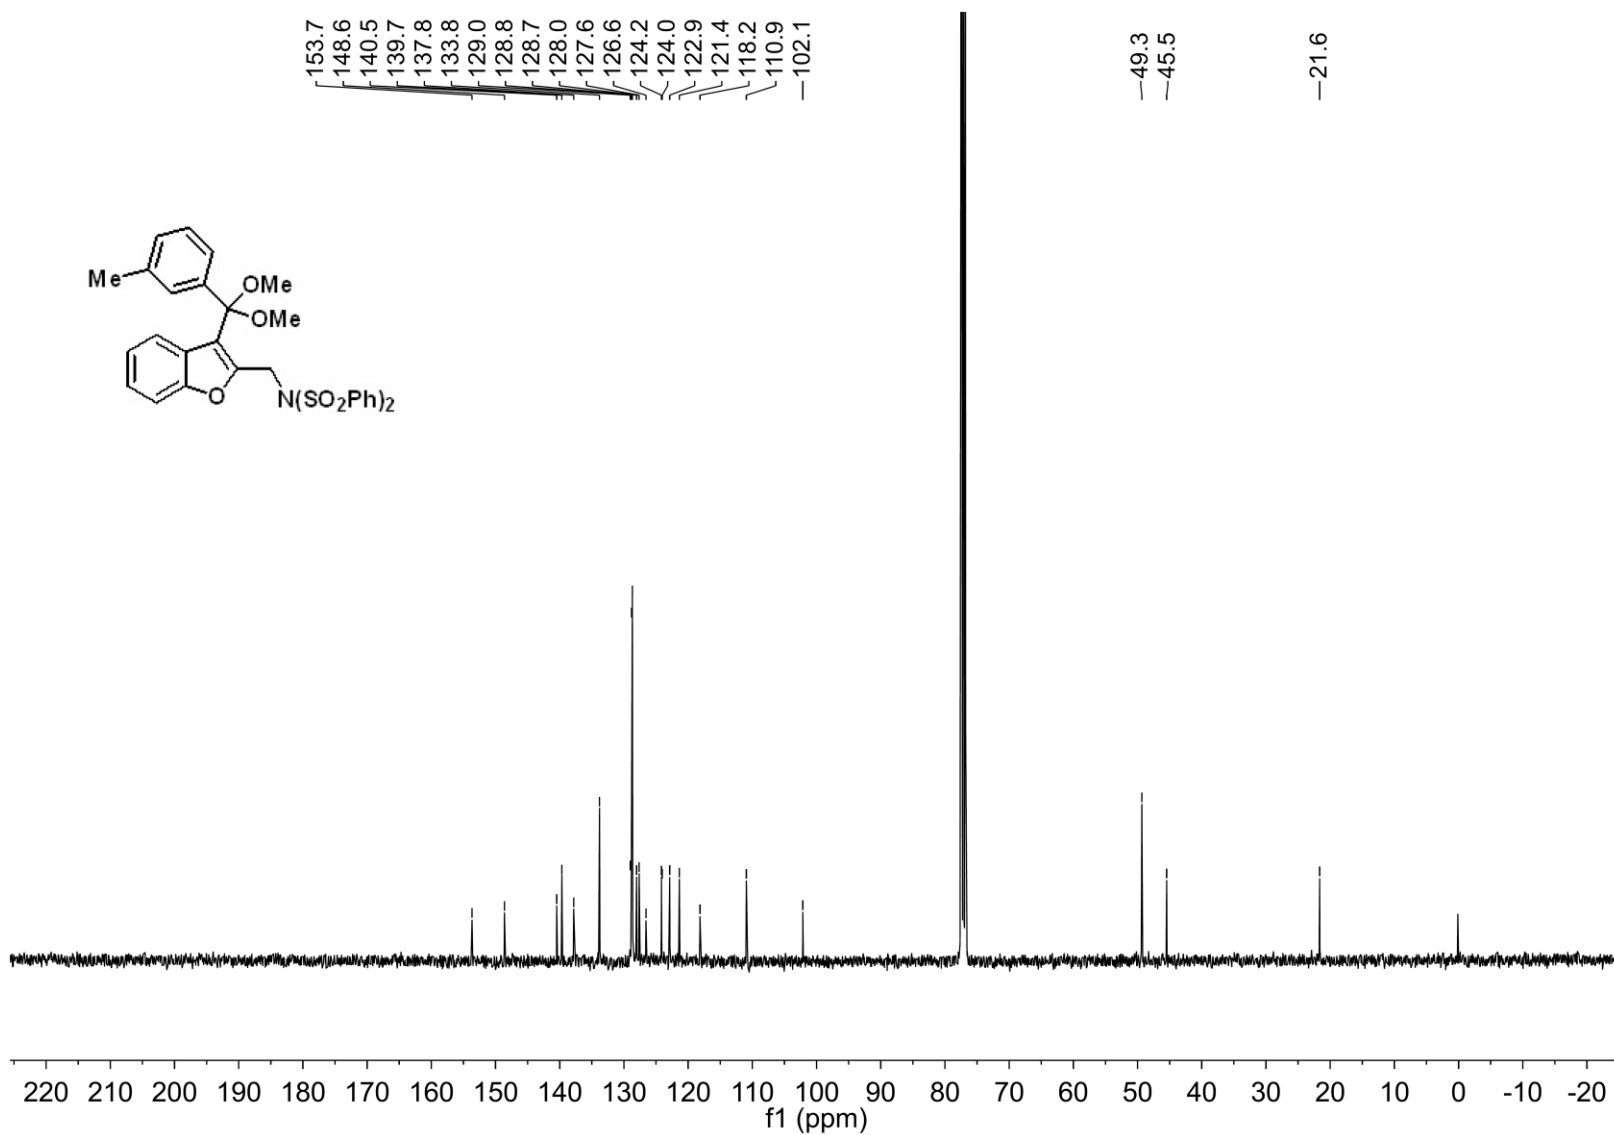

<sup>1</sup>H spectra of compound 3c:

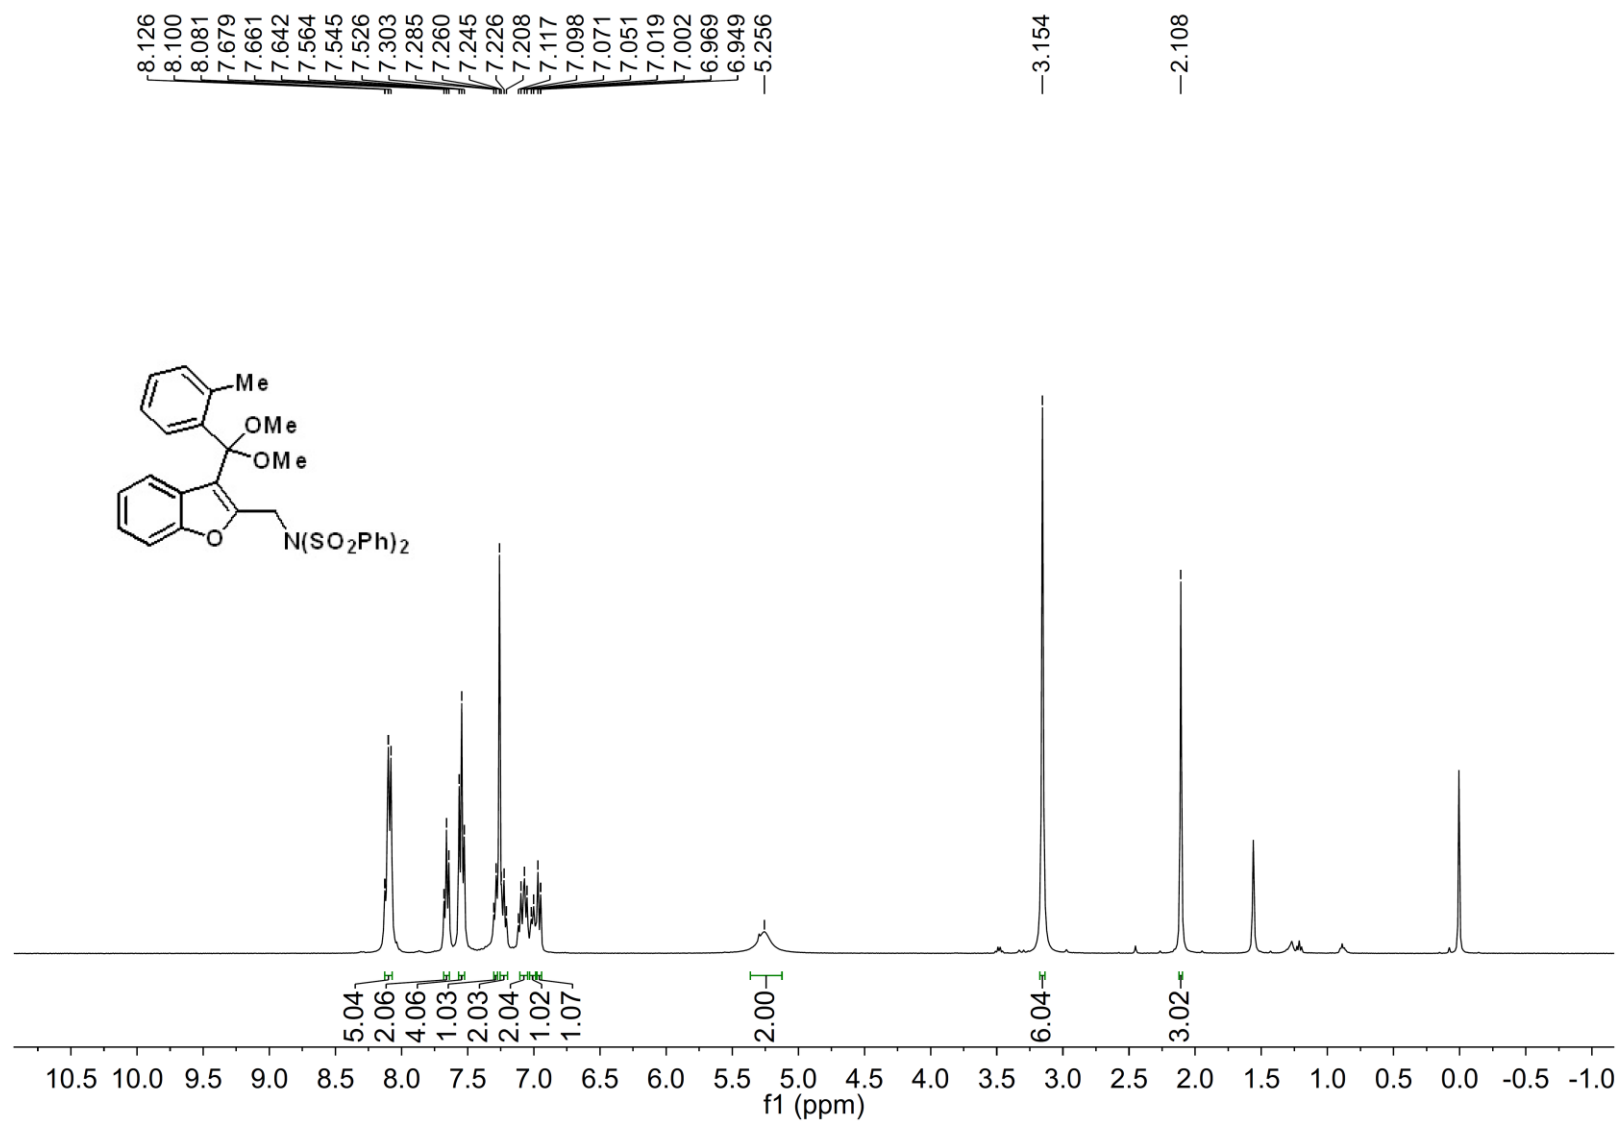

<sup>13</sup>C spectra of compound 3c:

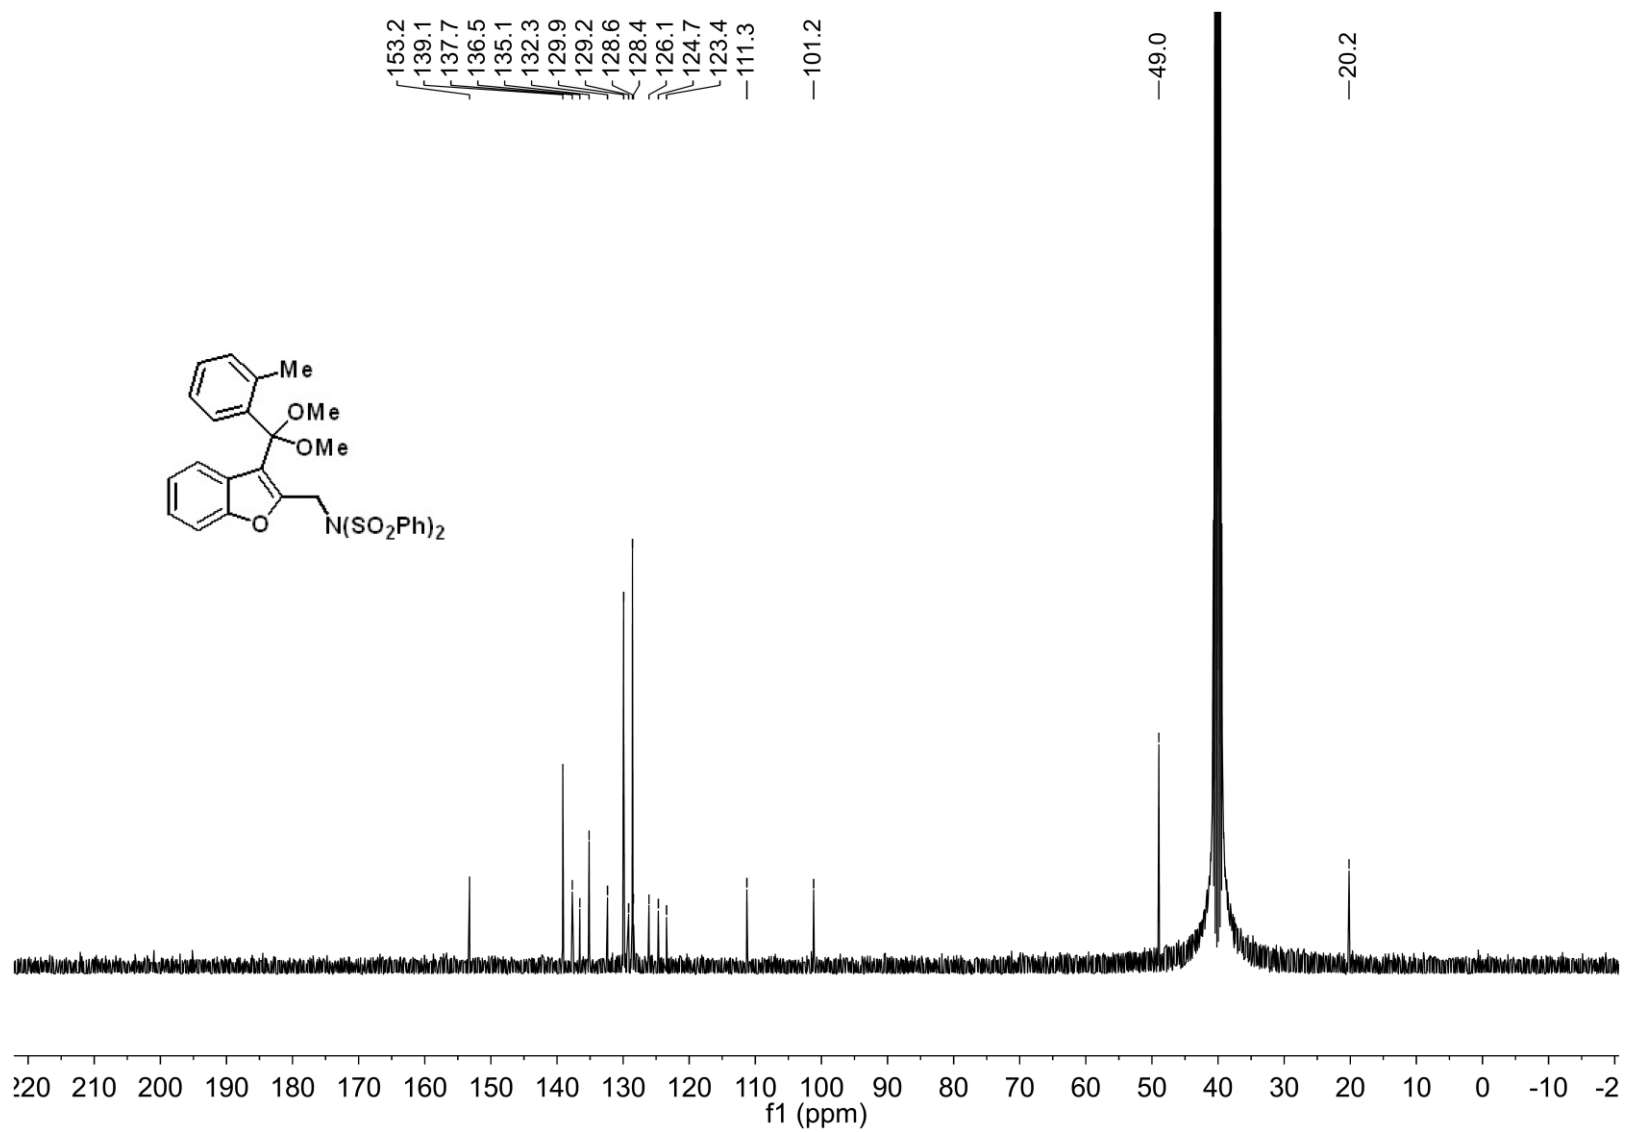



<sup>1</sup>H spectra of compound 3d:

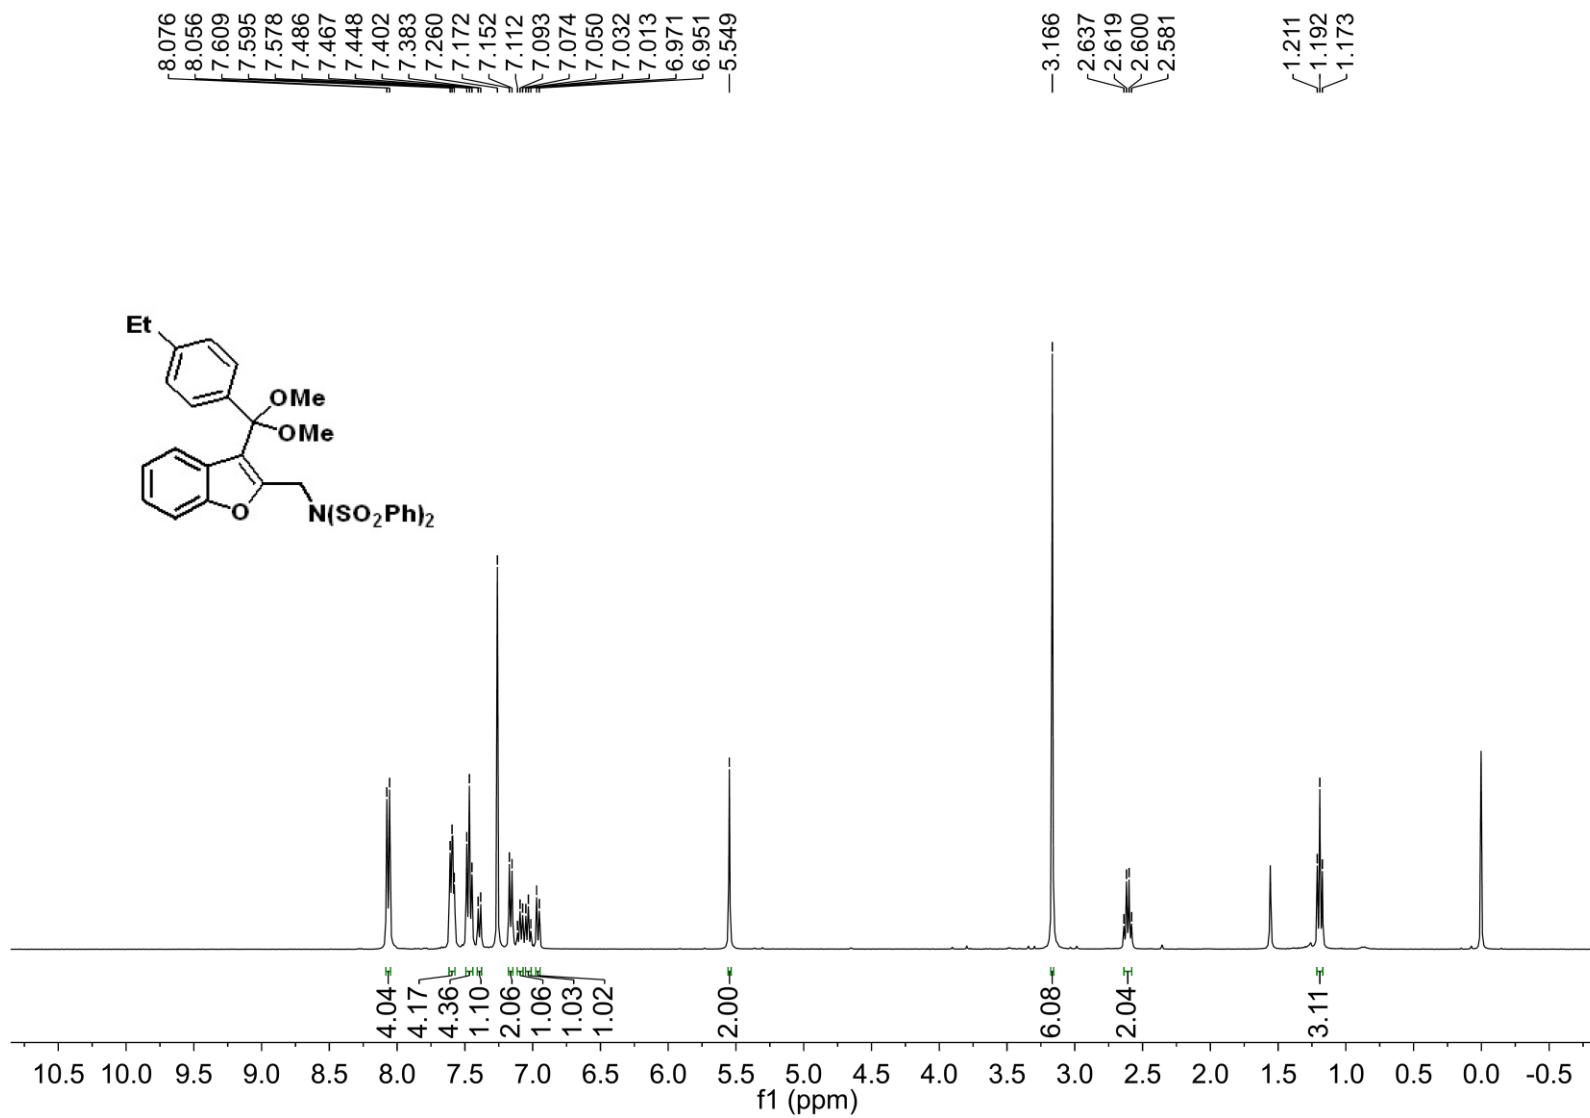

<sup>13</sup>C spectra of compound 3d:

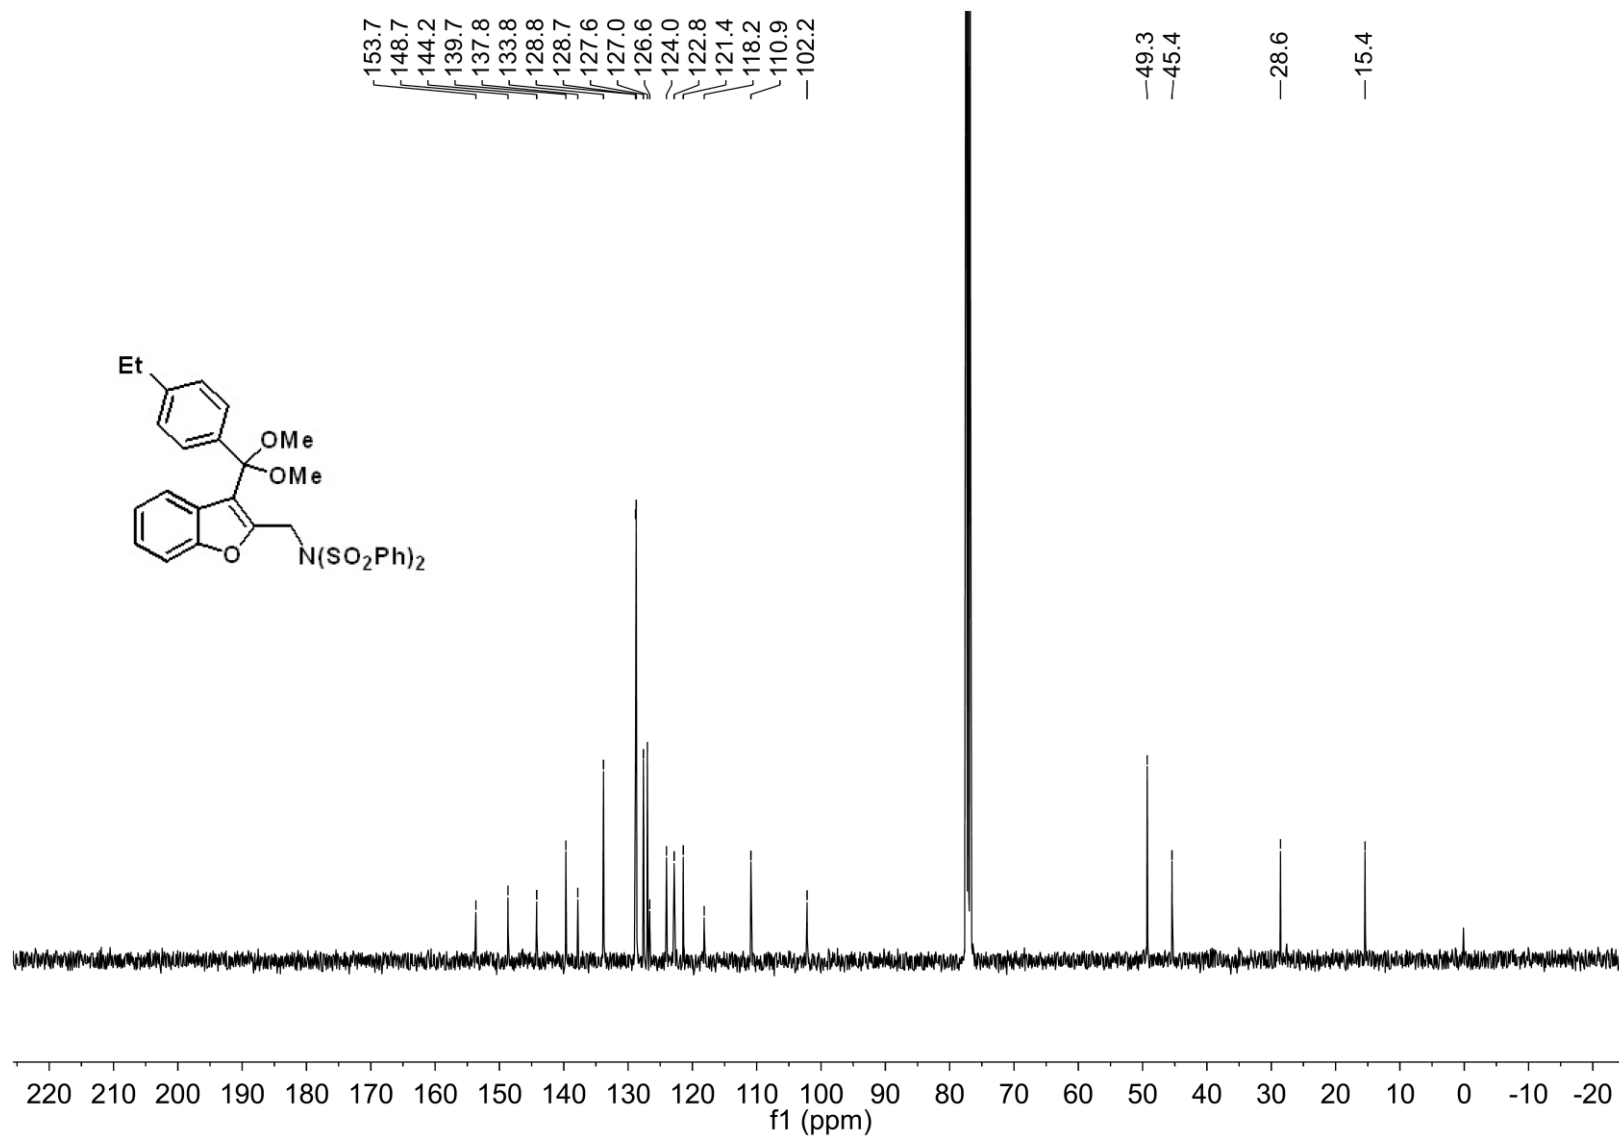

<sup>1</sup>H spectra of compound 3e:

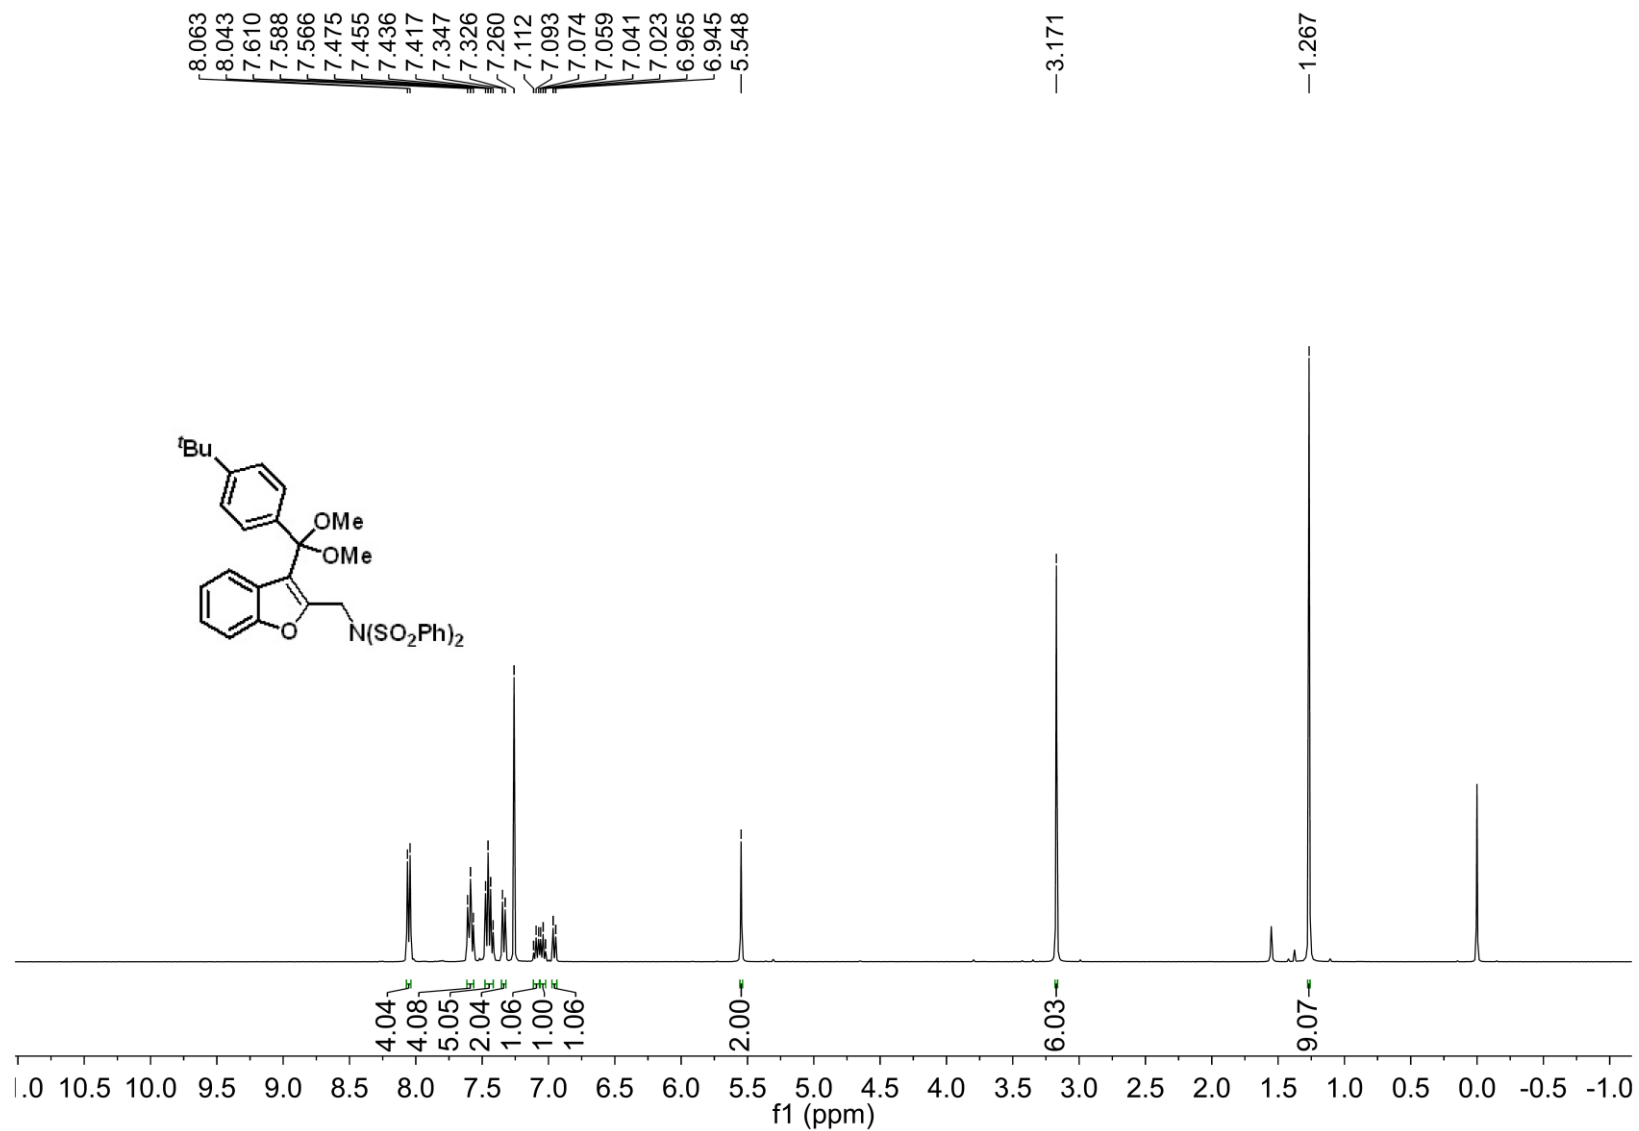

<sup>13</sup>C spectra of compound 3e:

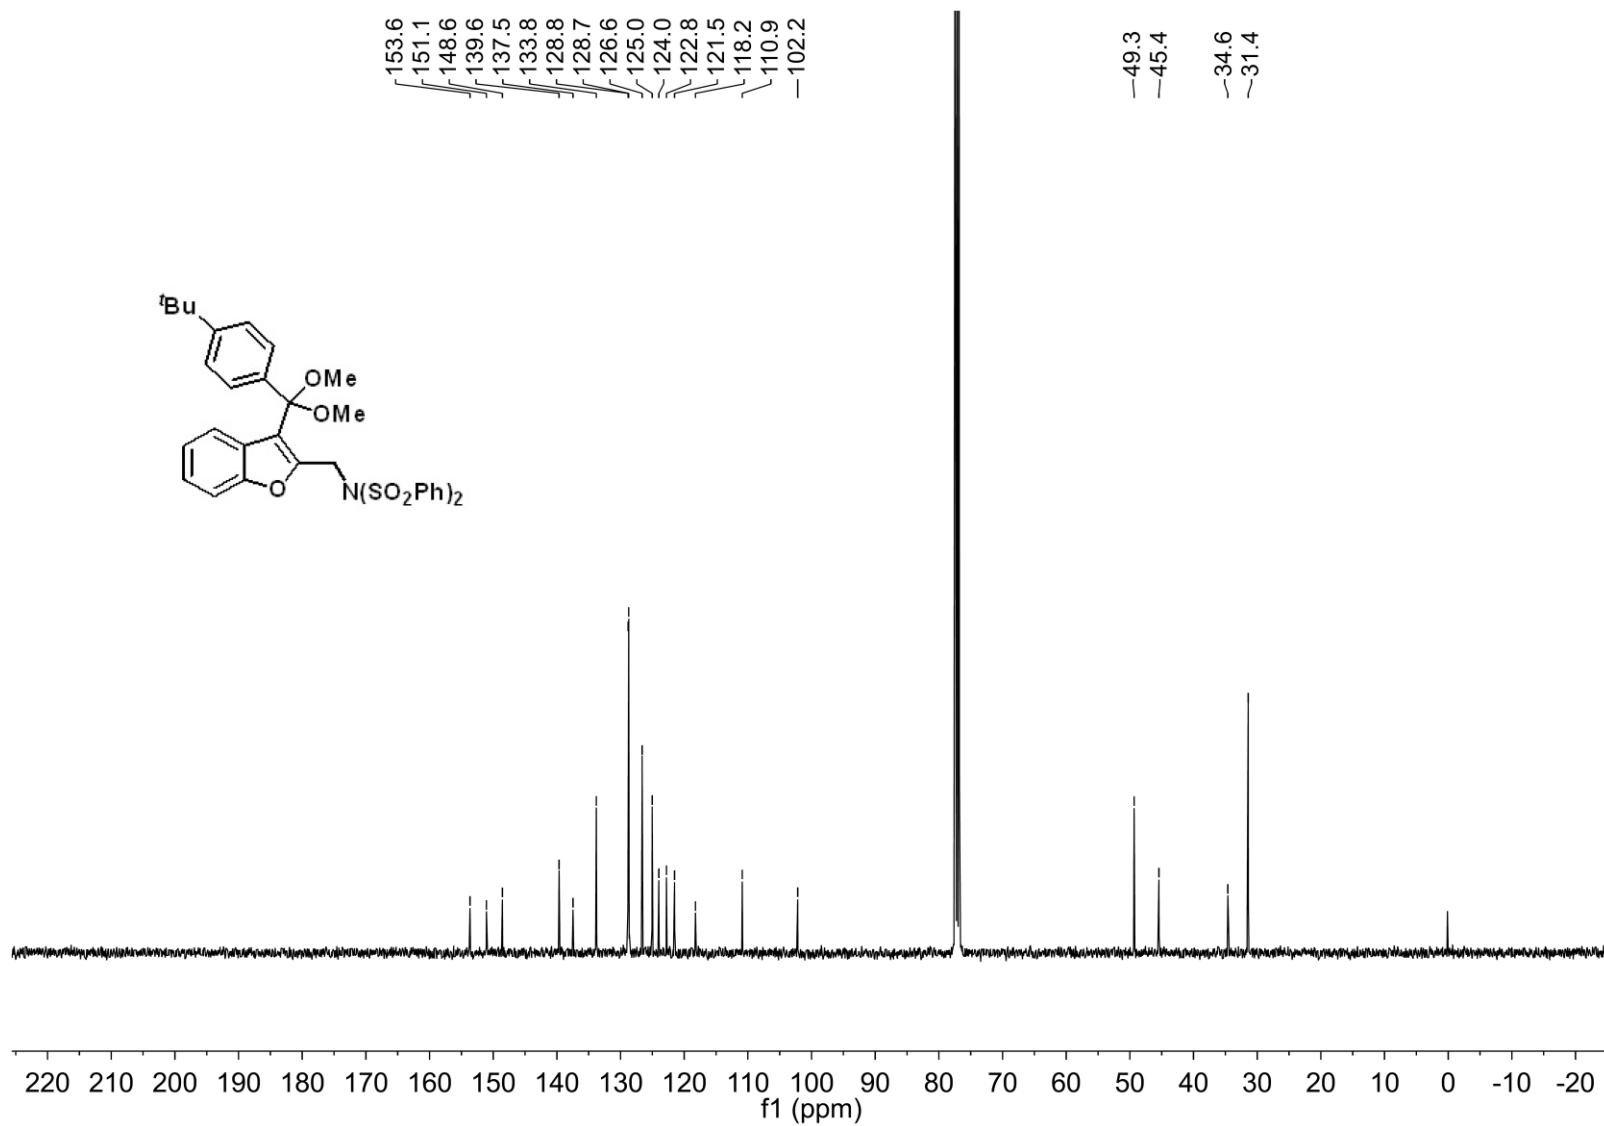

<sup>1</sup>H spectra of compound 3f:

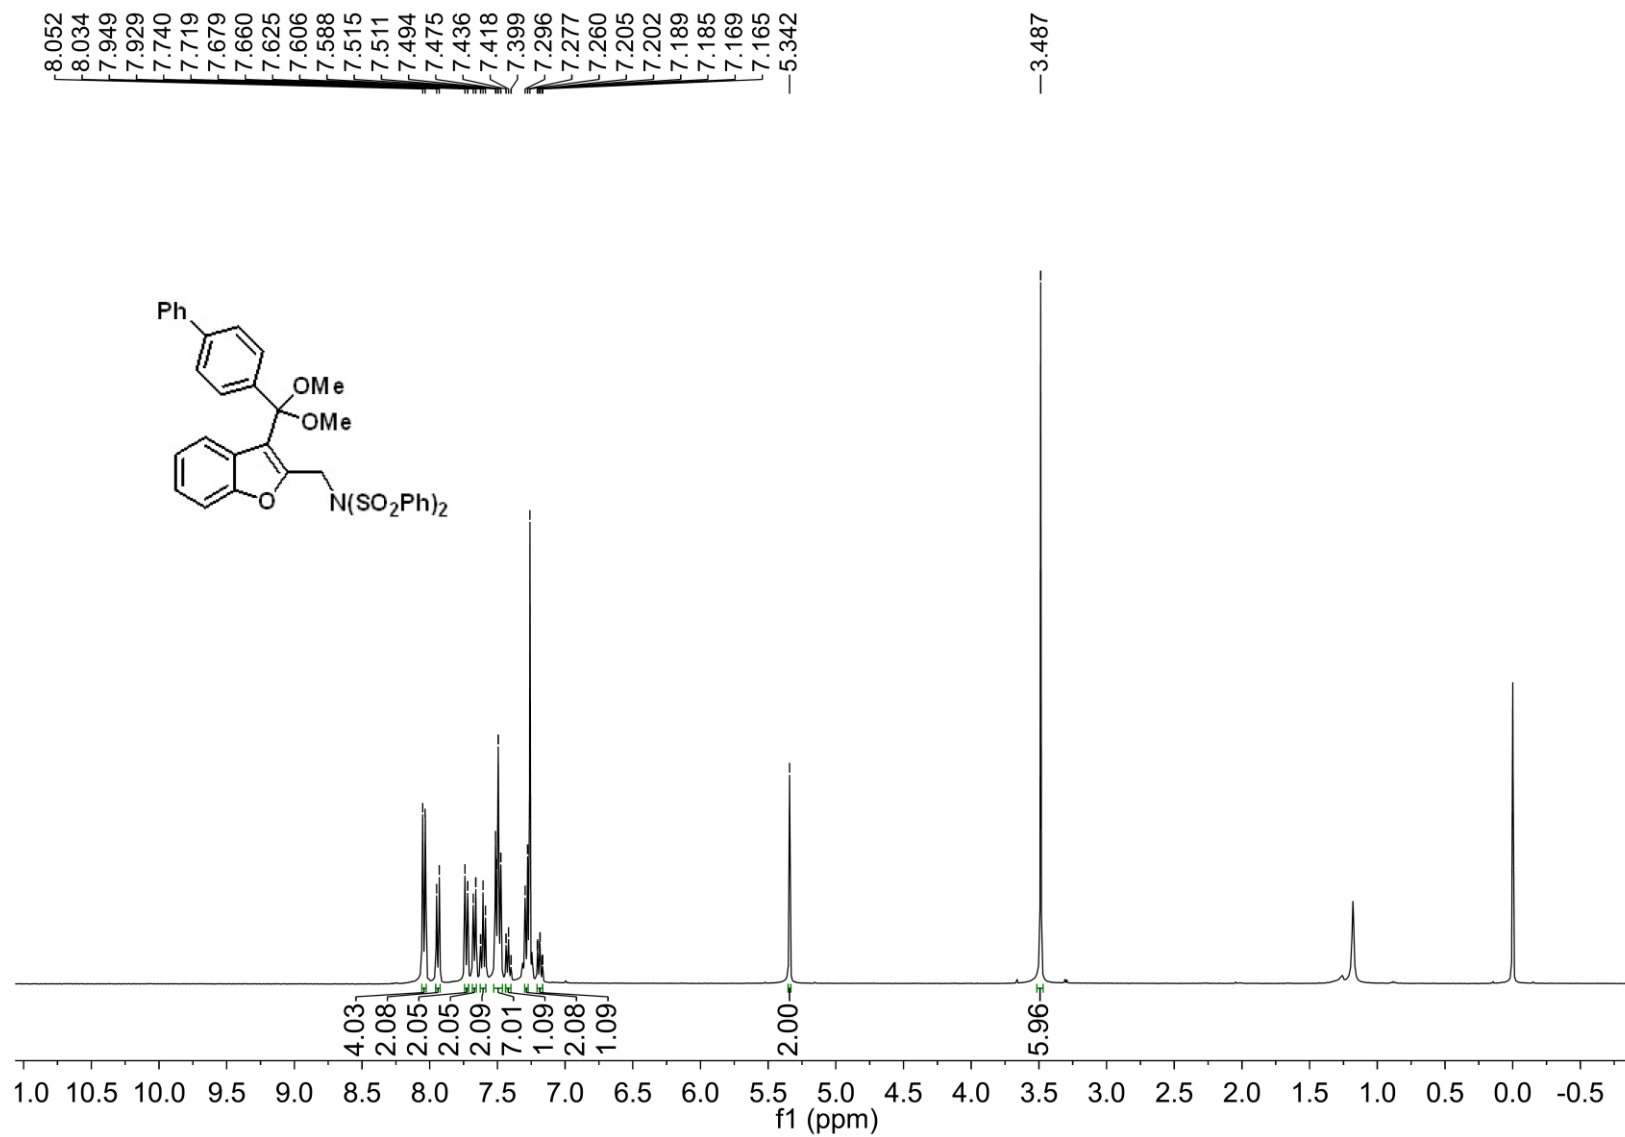

<sup>13</sup>C spectra of compound 3f:

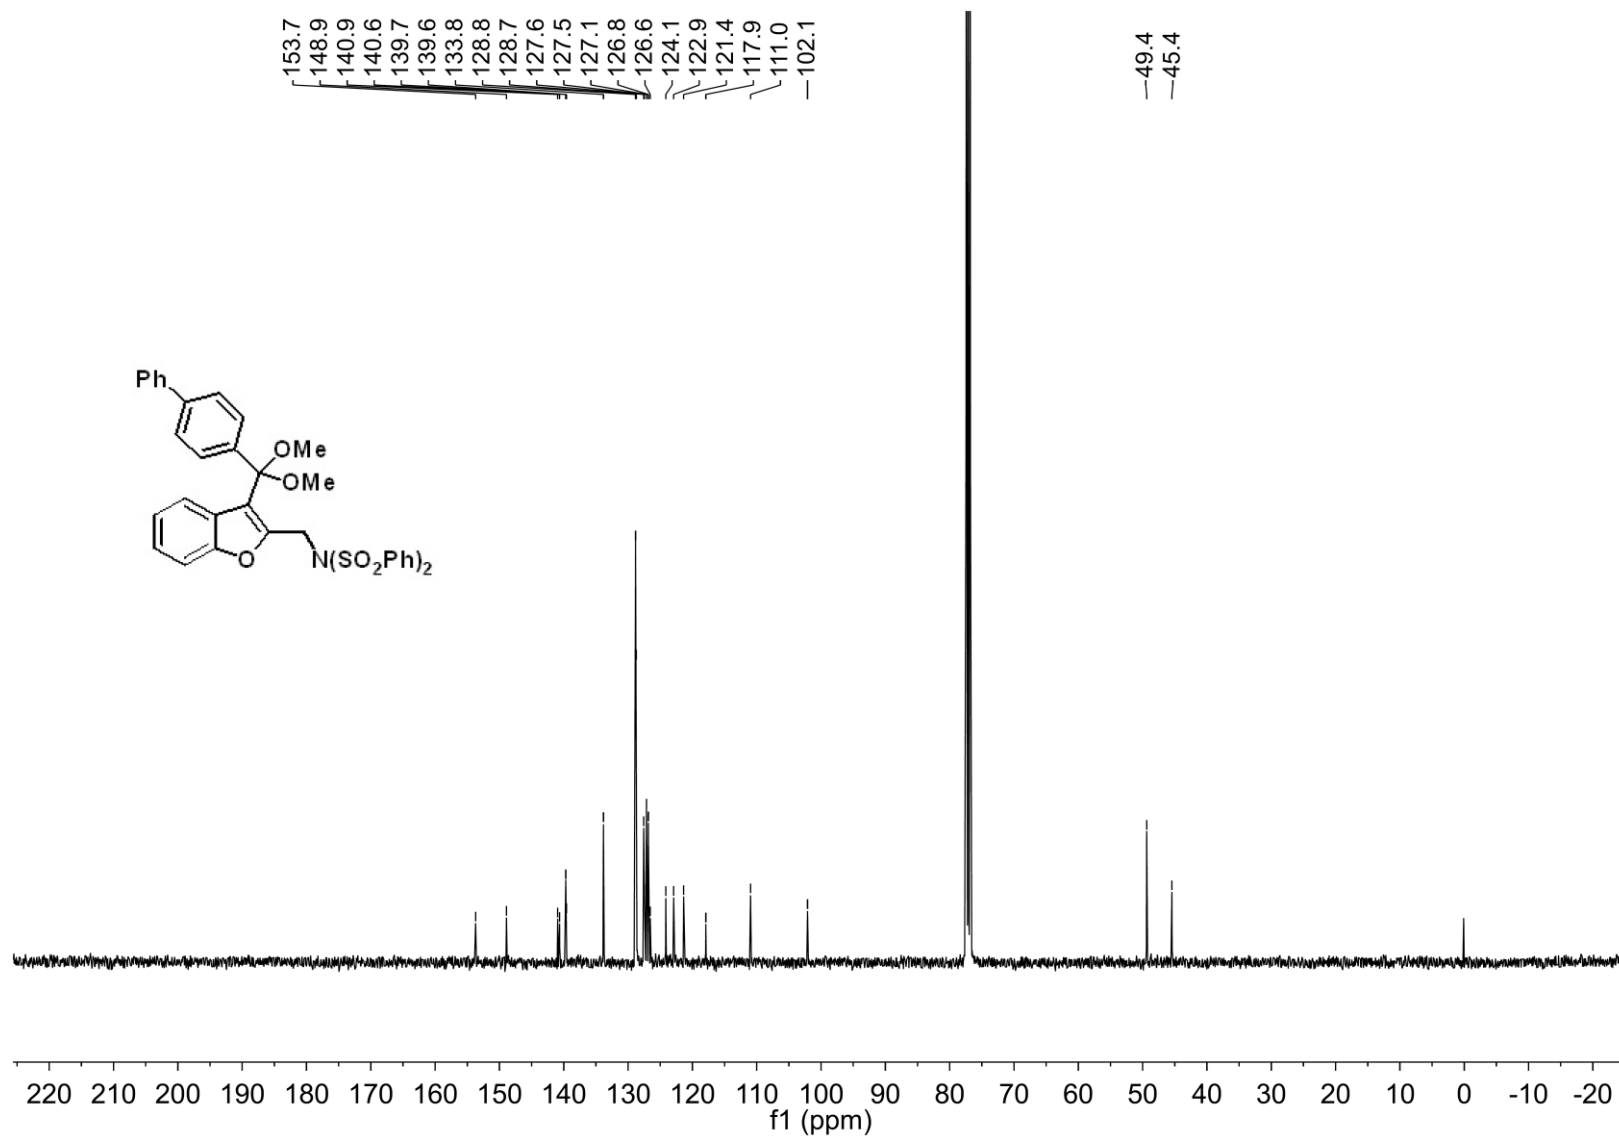

<sup>1</sup>H spectra of compound 3g:

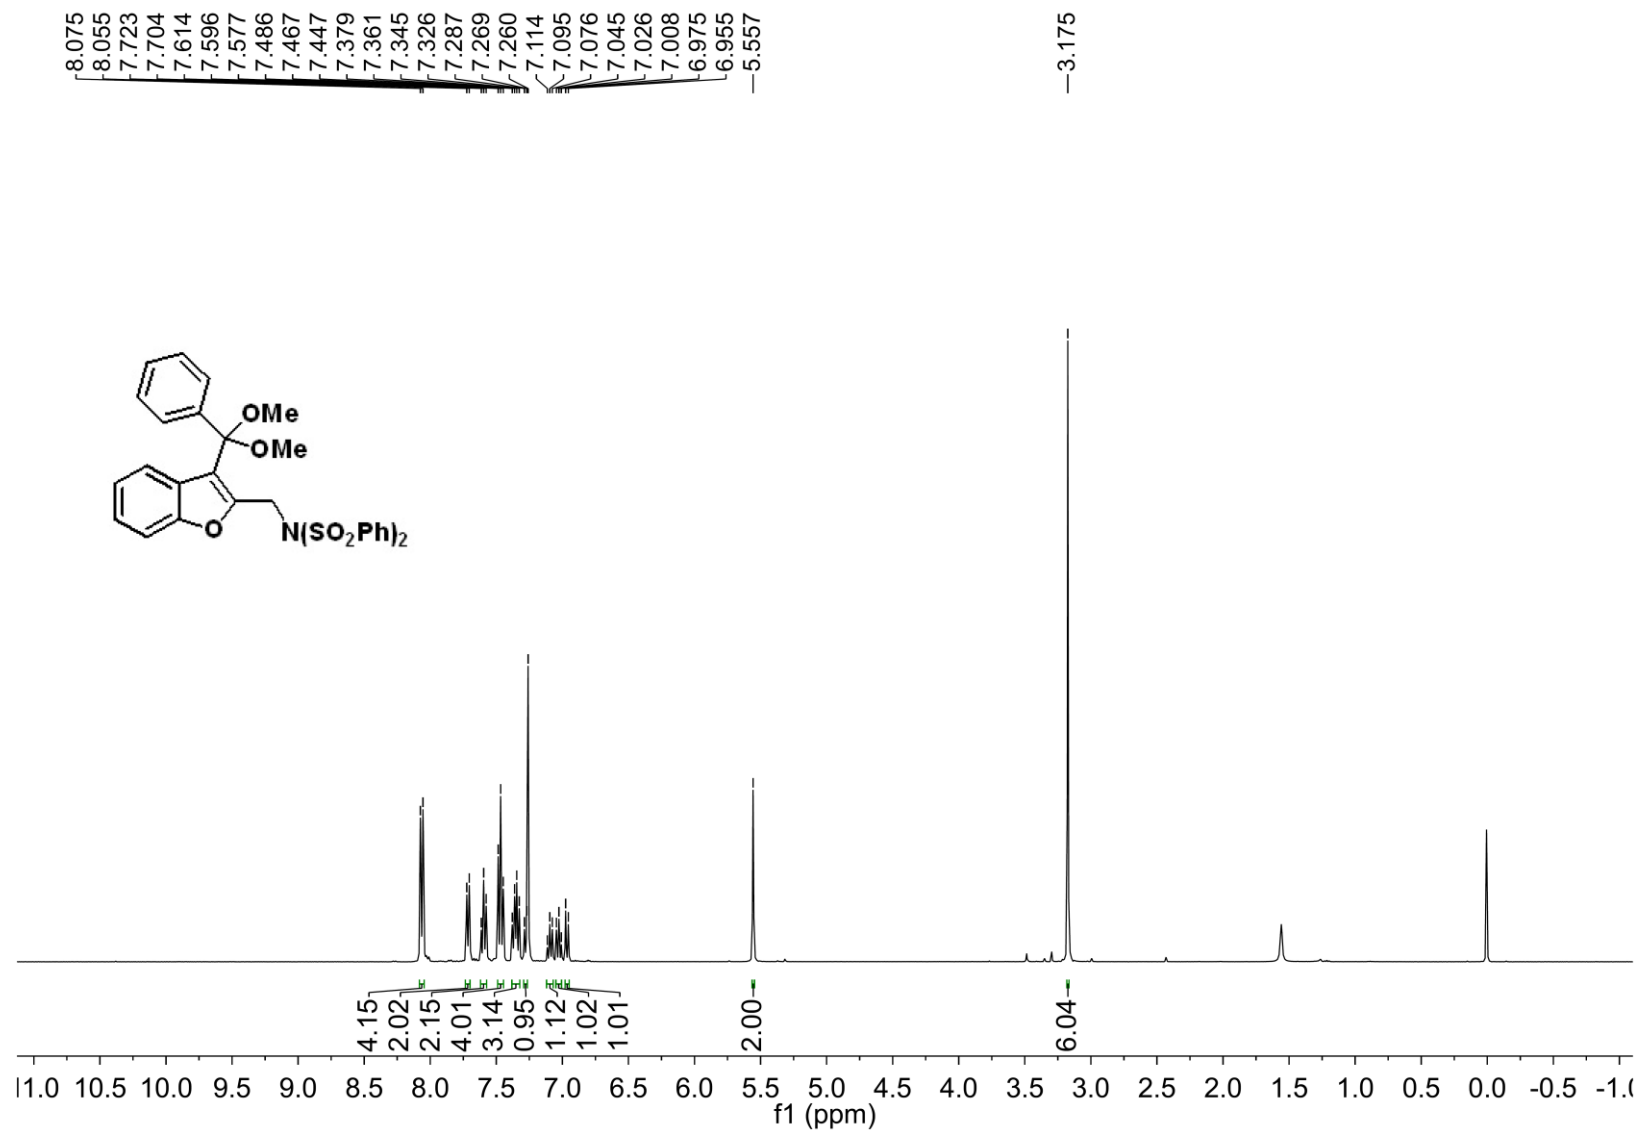

<sup>13</sup>C spectra of compound 3g:

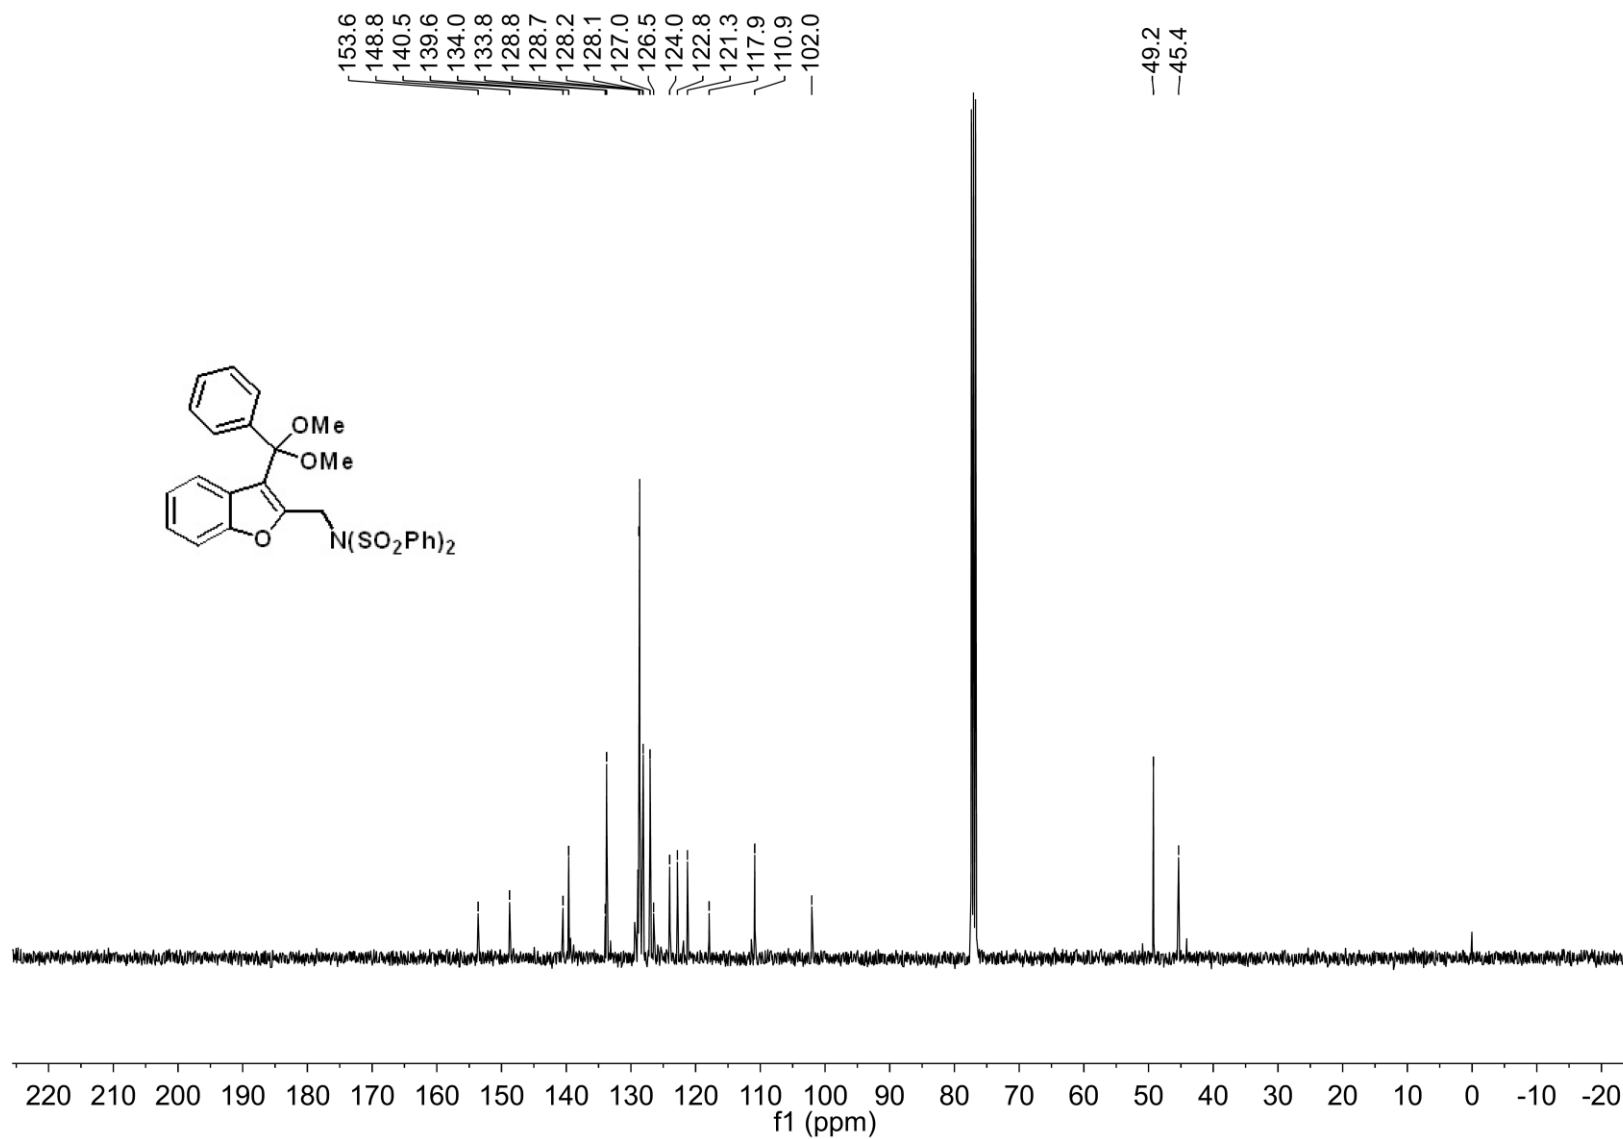



<sup>1</sup>H spectra of compound 3h:

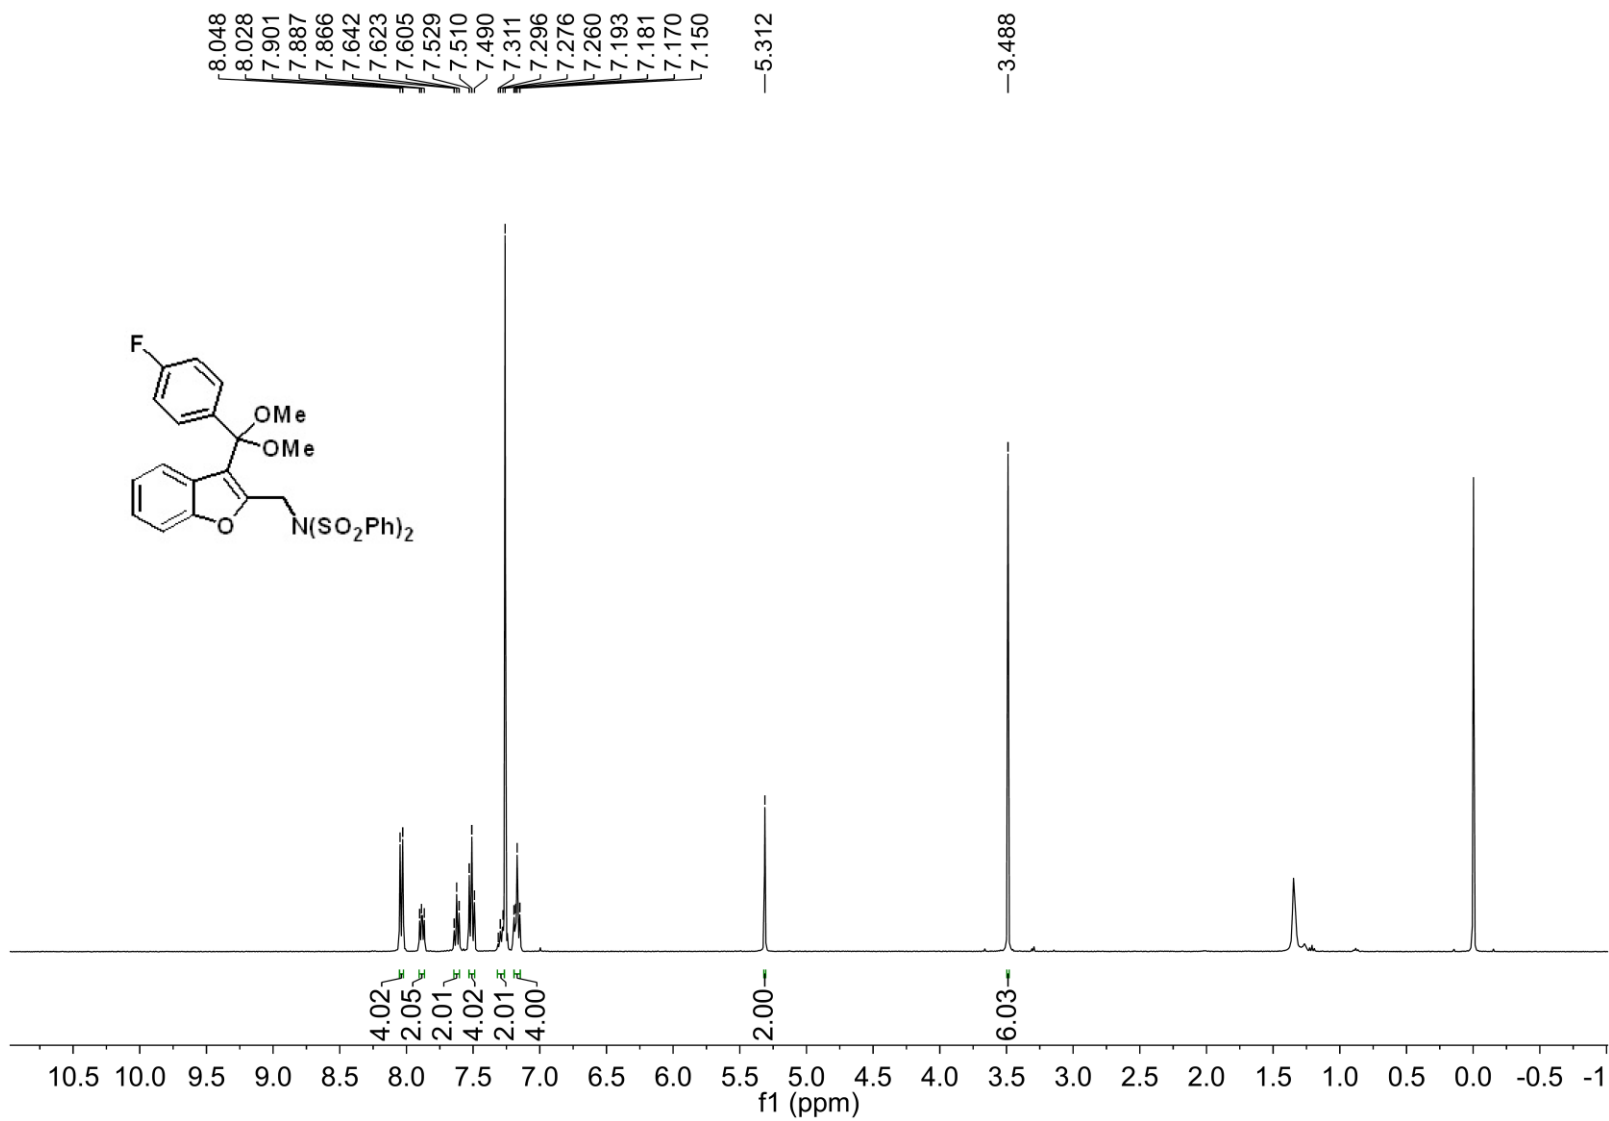

<sup>13</sup>C spectra of compound 3h:

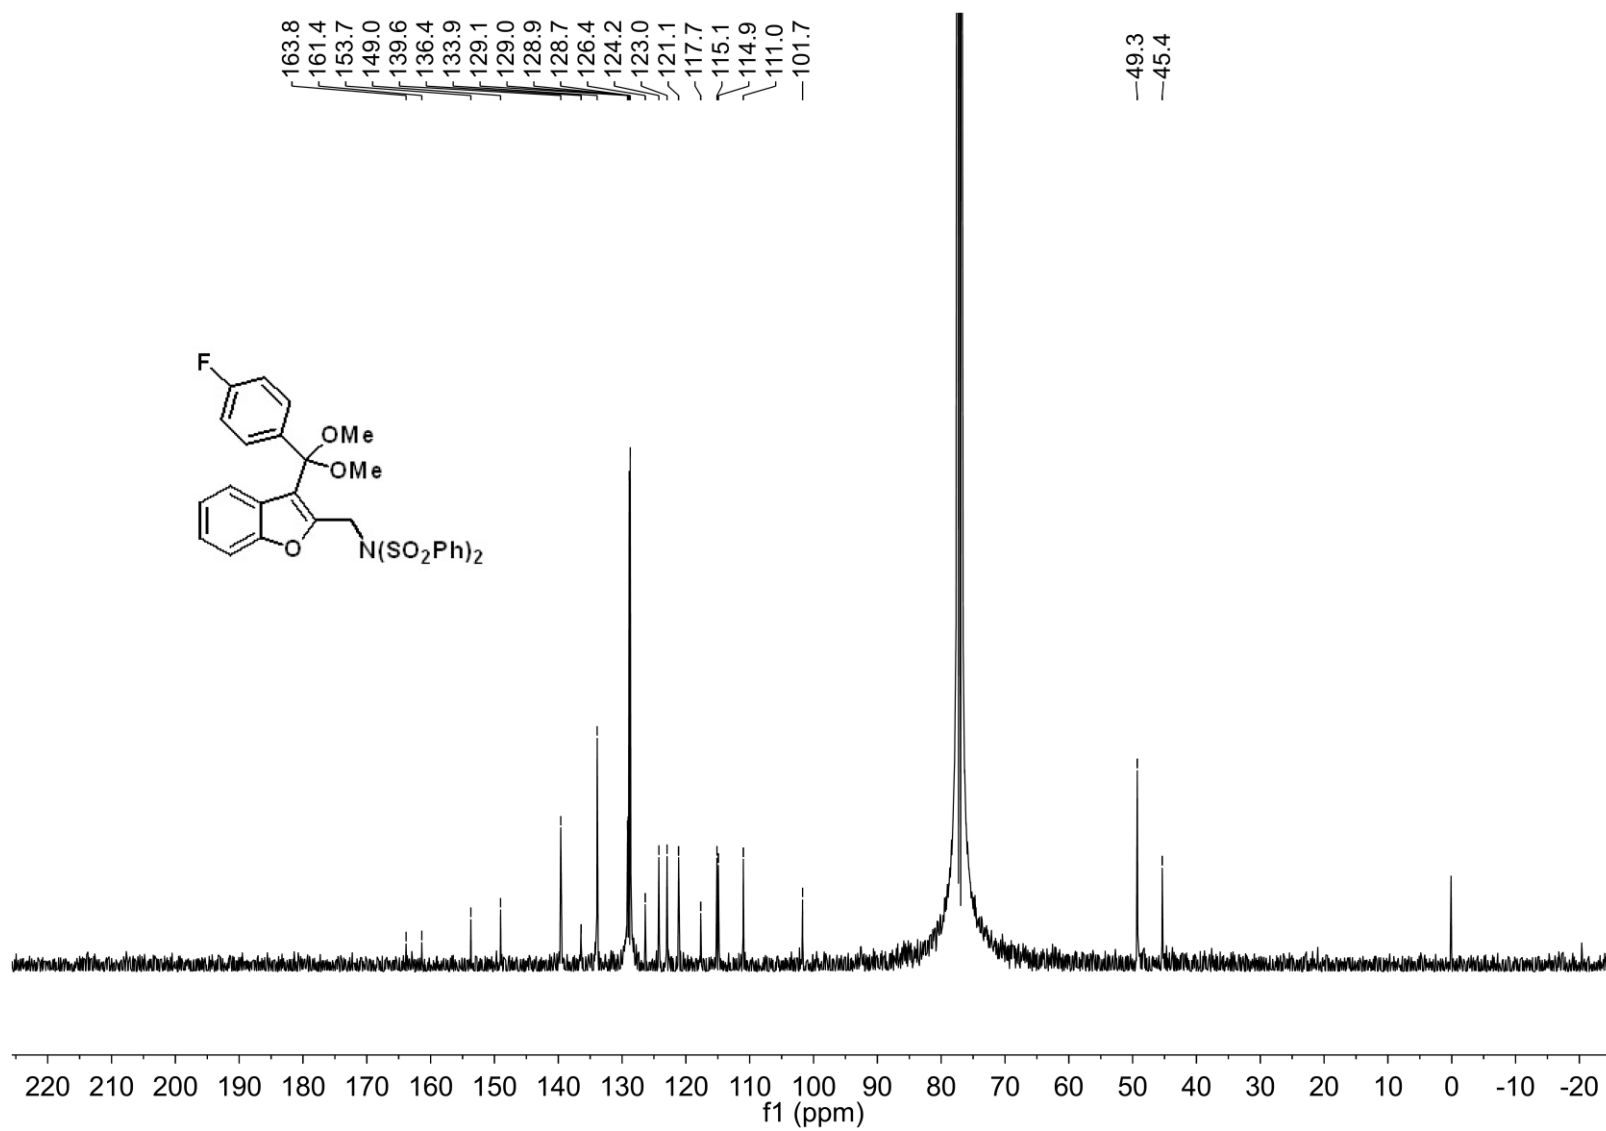

<sup>1</sup>H spectra of compound 3i:

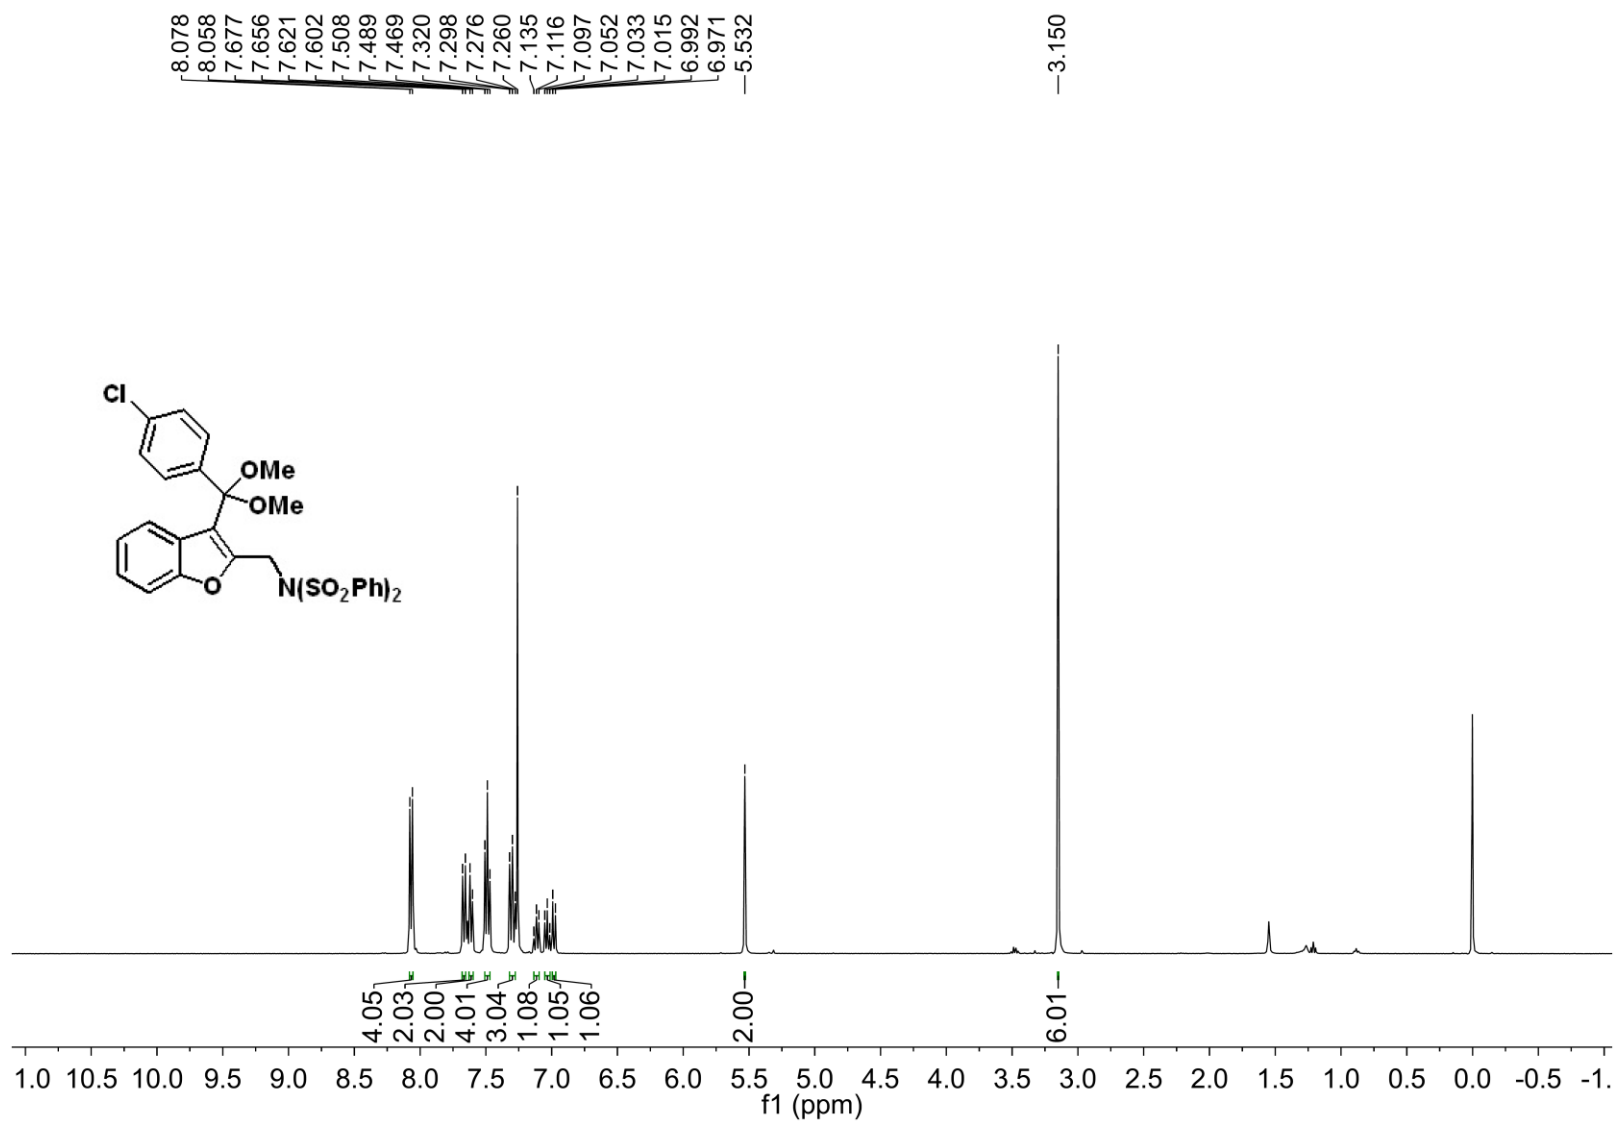

<sup>13</sup>C spectra of compound 3i:

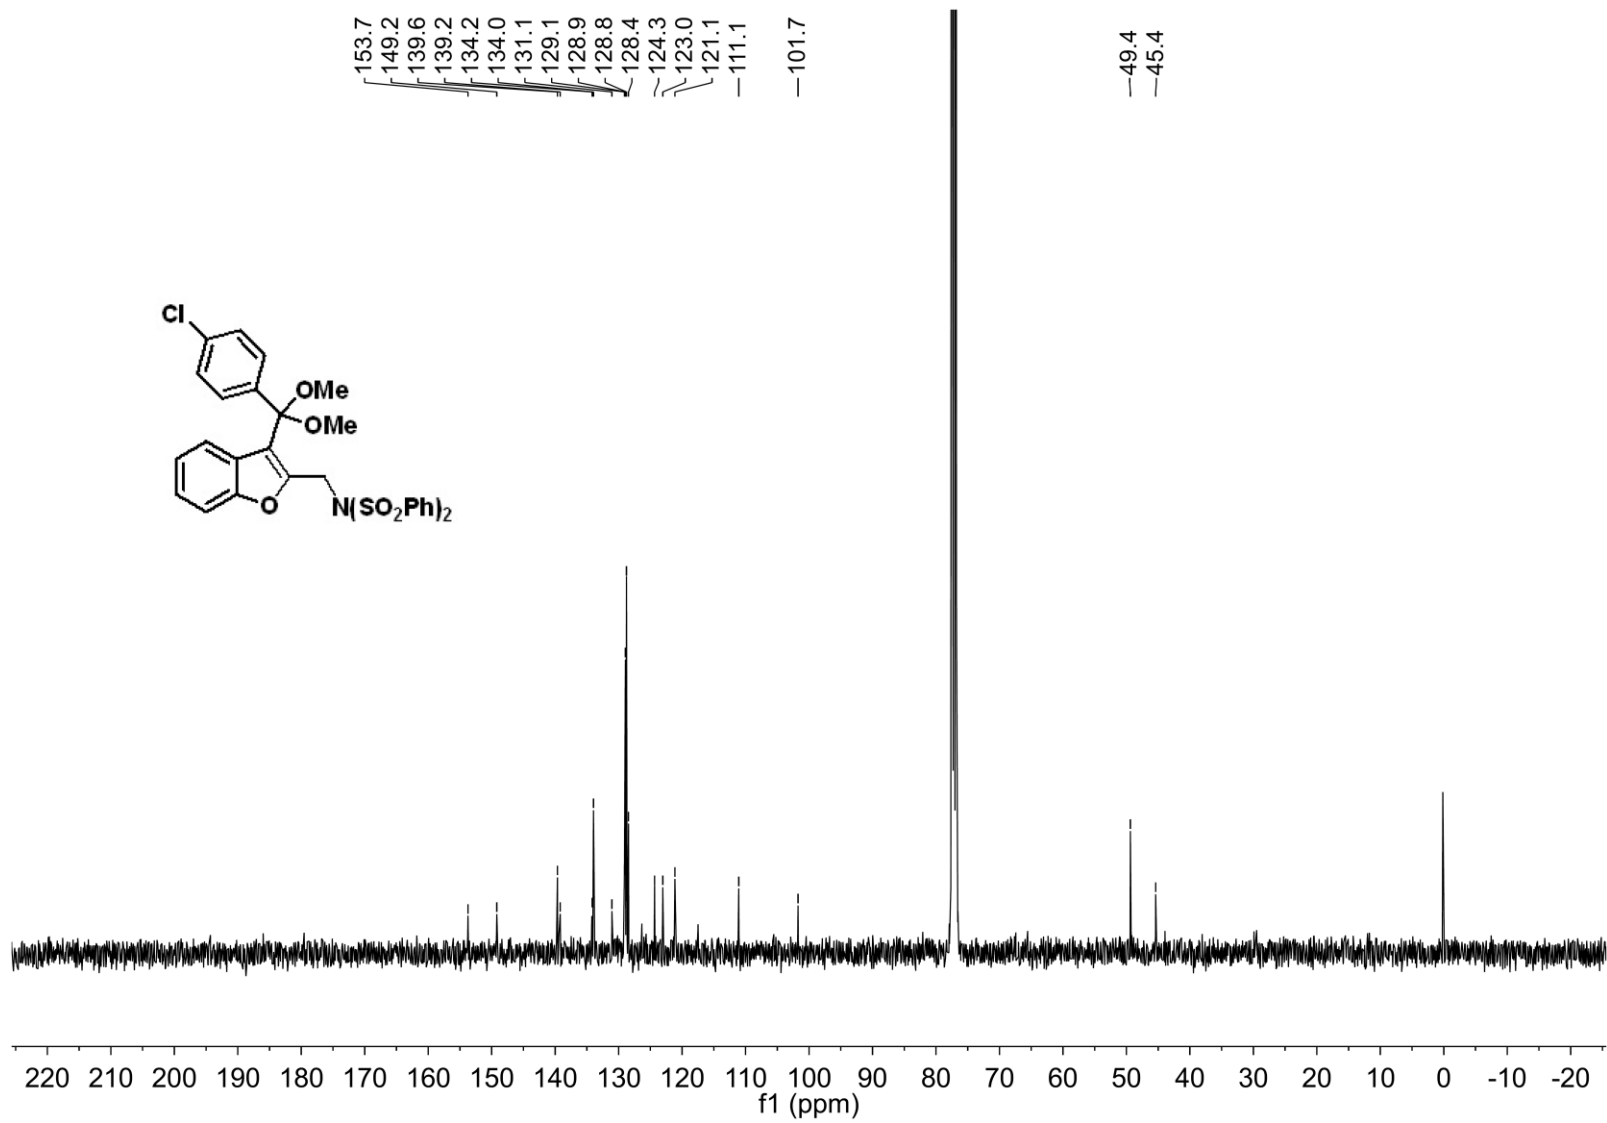

<sup>1</sup>H spectra of compound 3j:

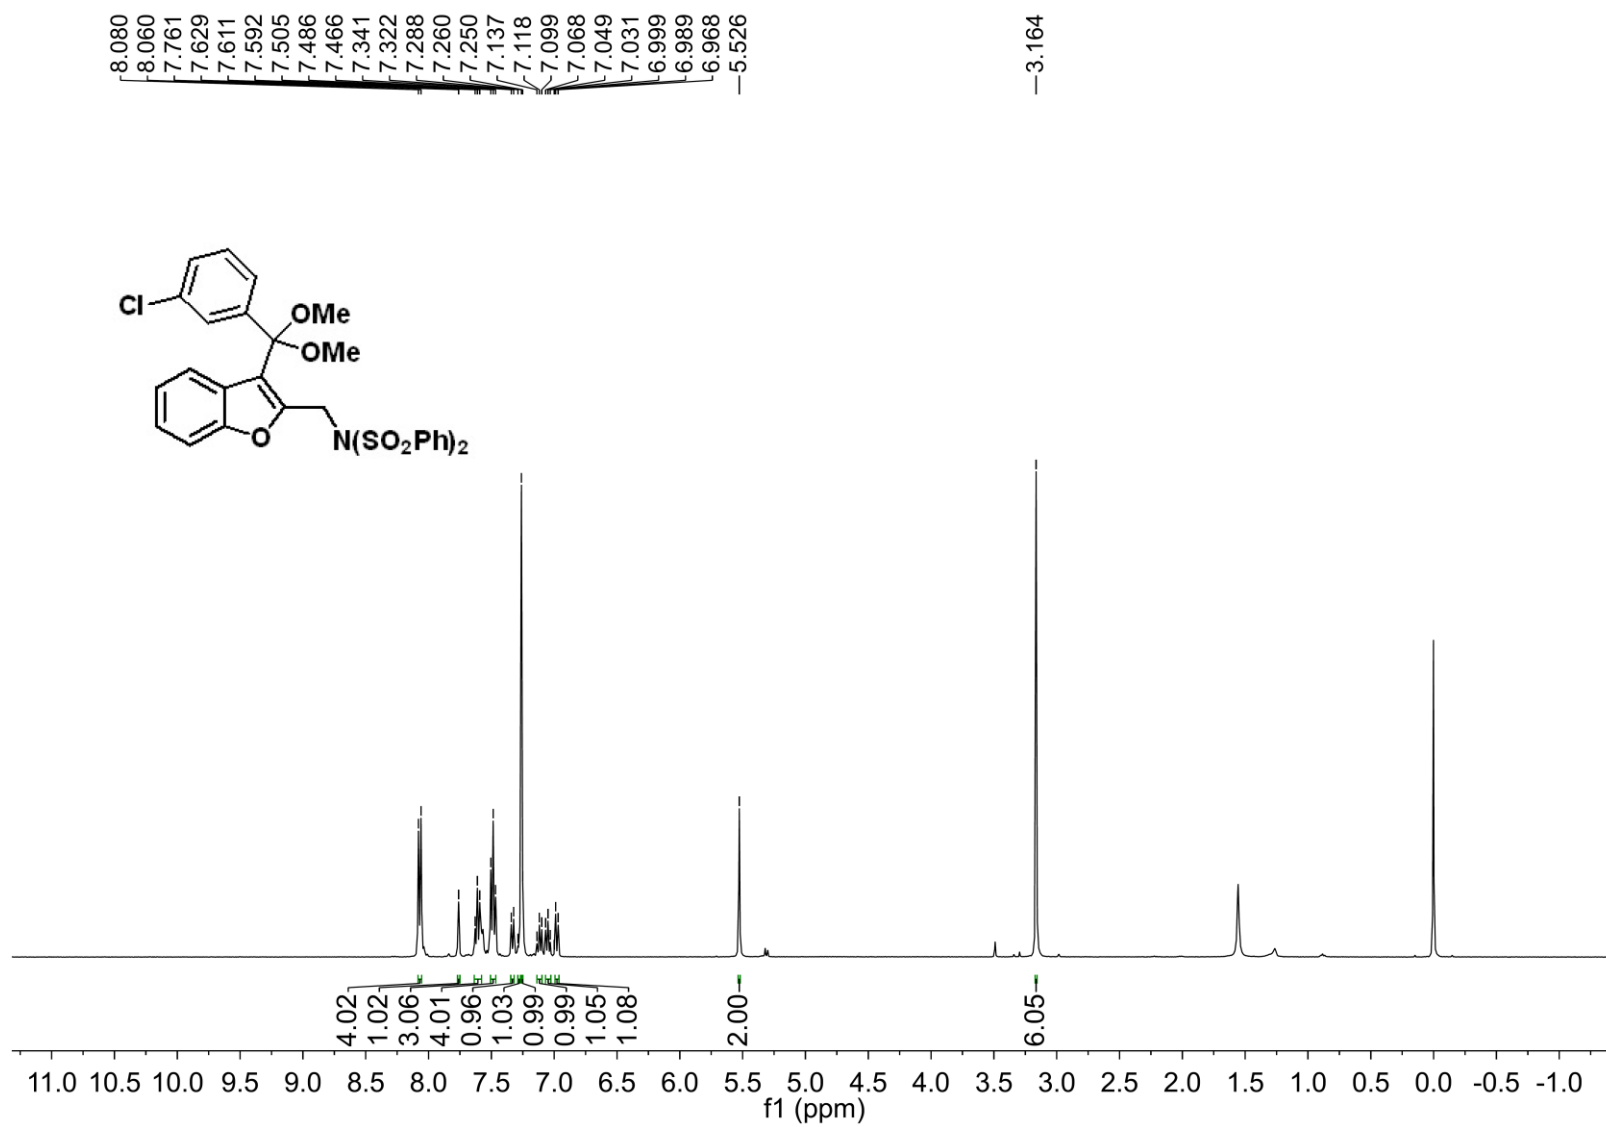

<sup>13</sup>C spectra of compound 3j:

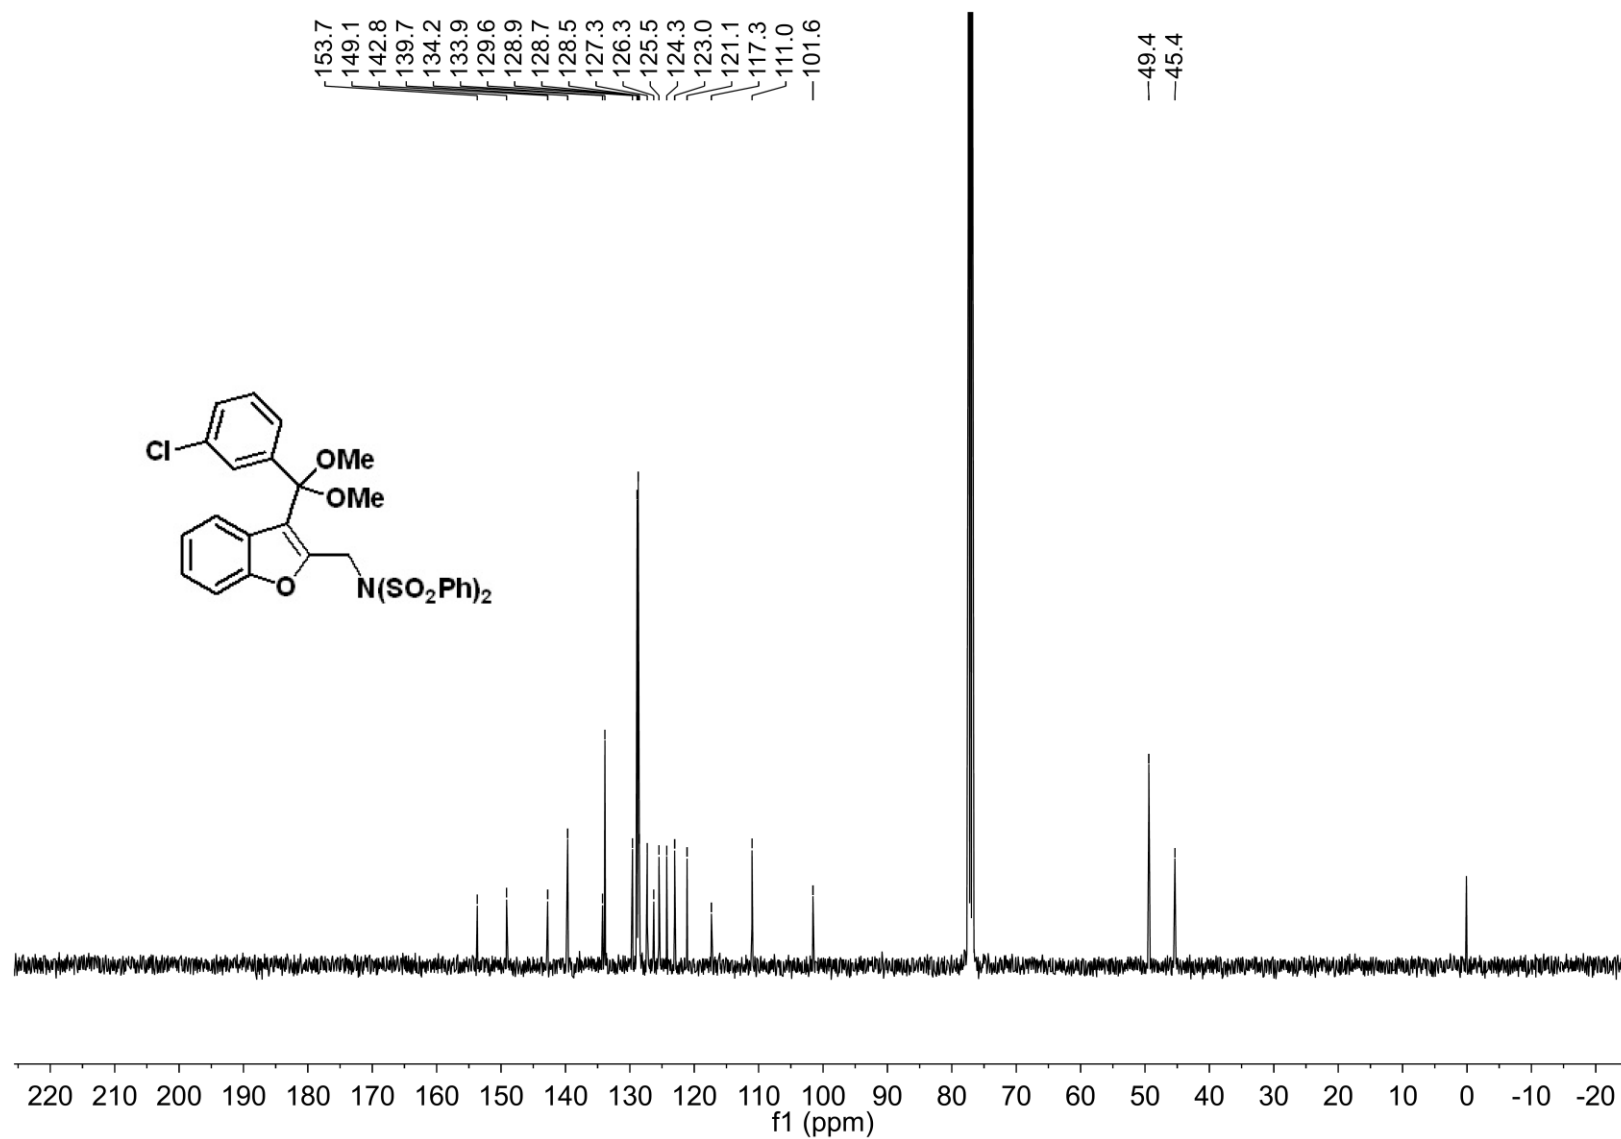

<sup>1</sup>H spectra of compound 3k:

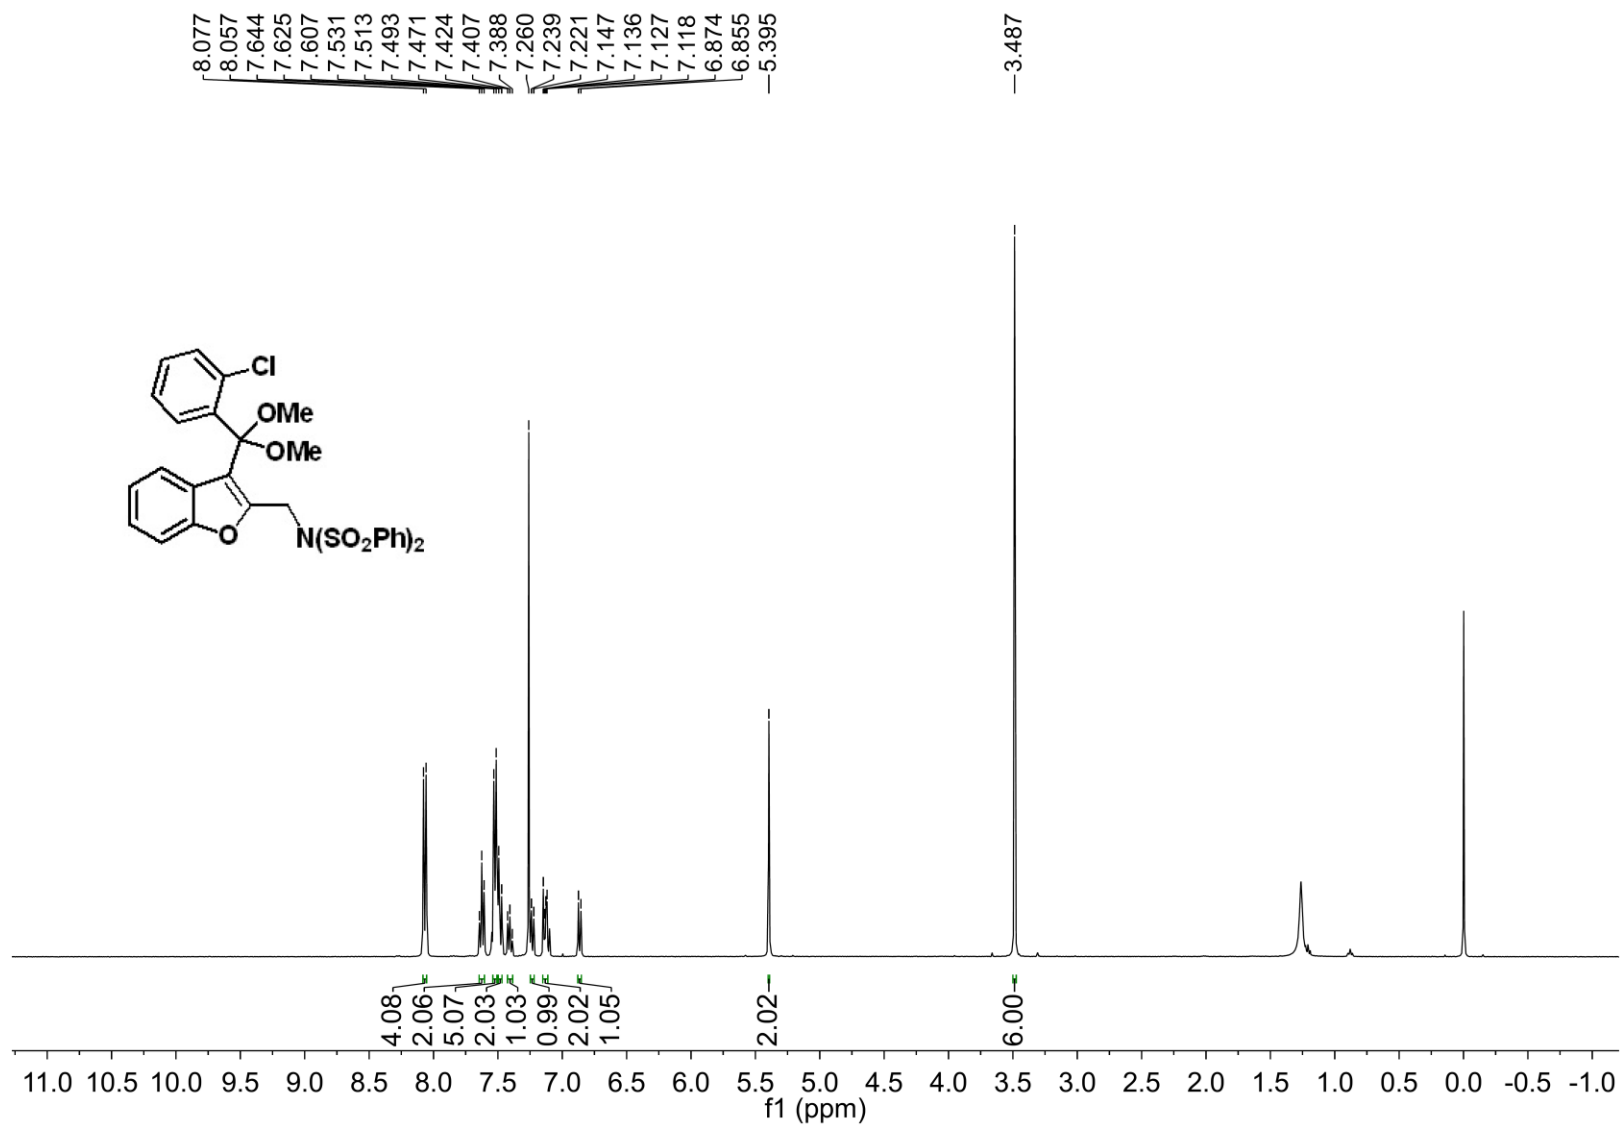

<sup>13</sup>C spectra of compound 3k:

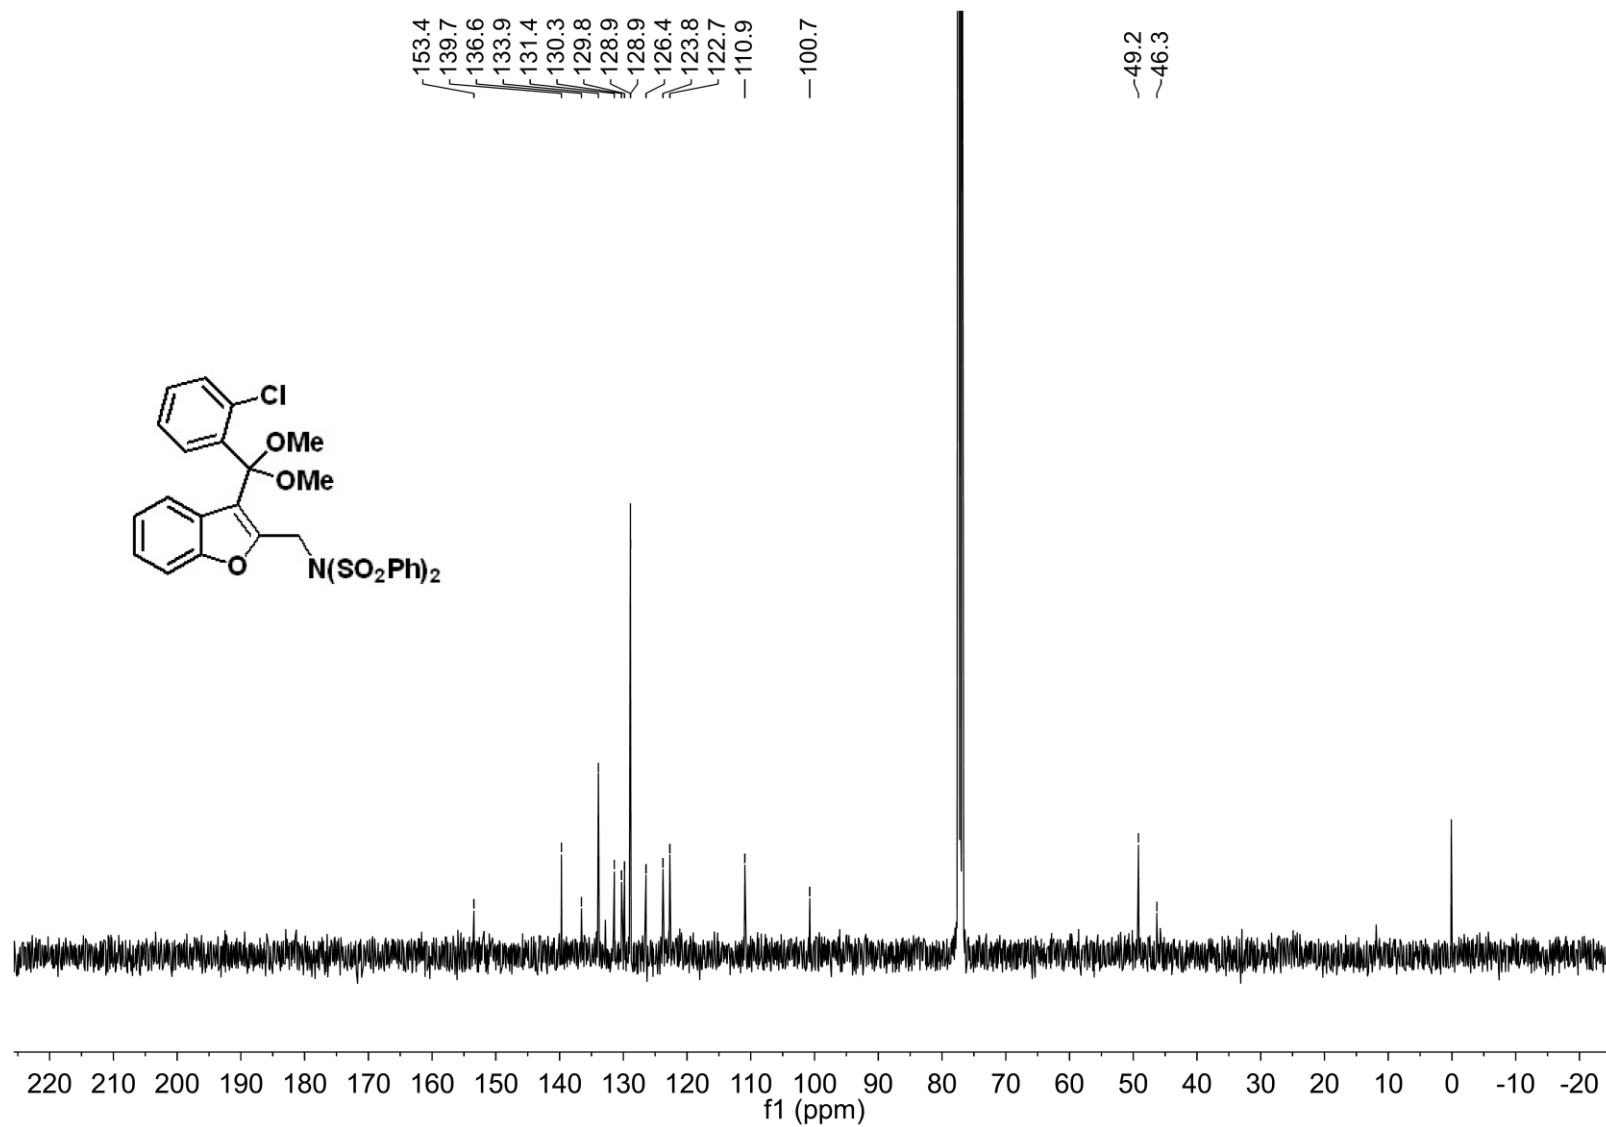



<sup>1</sup>H spectra of compound 3l:

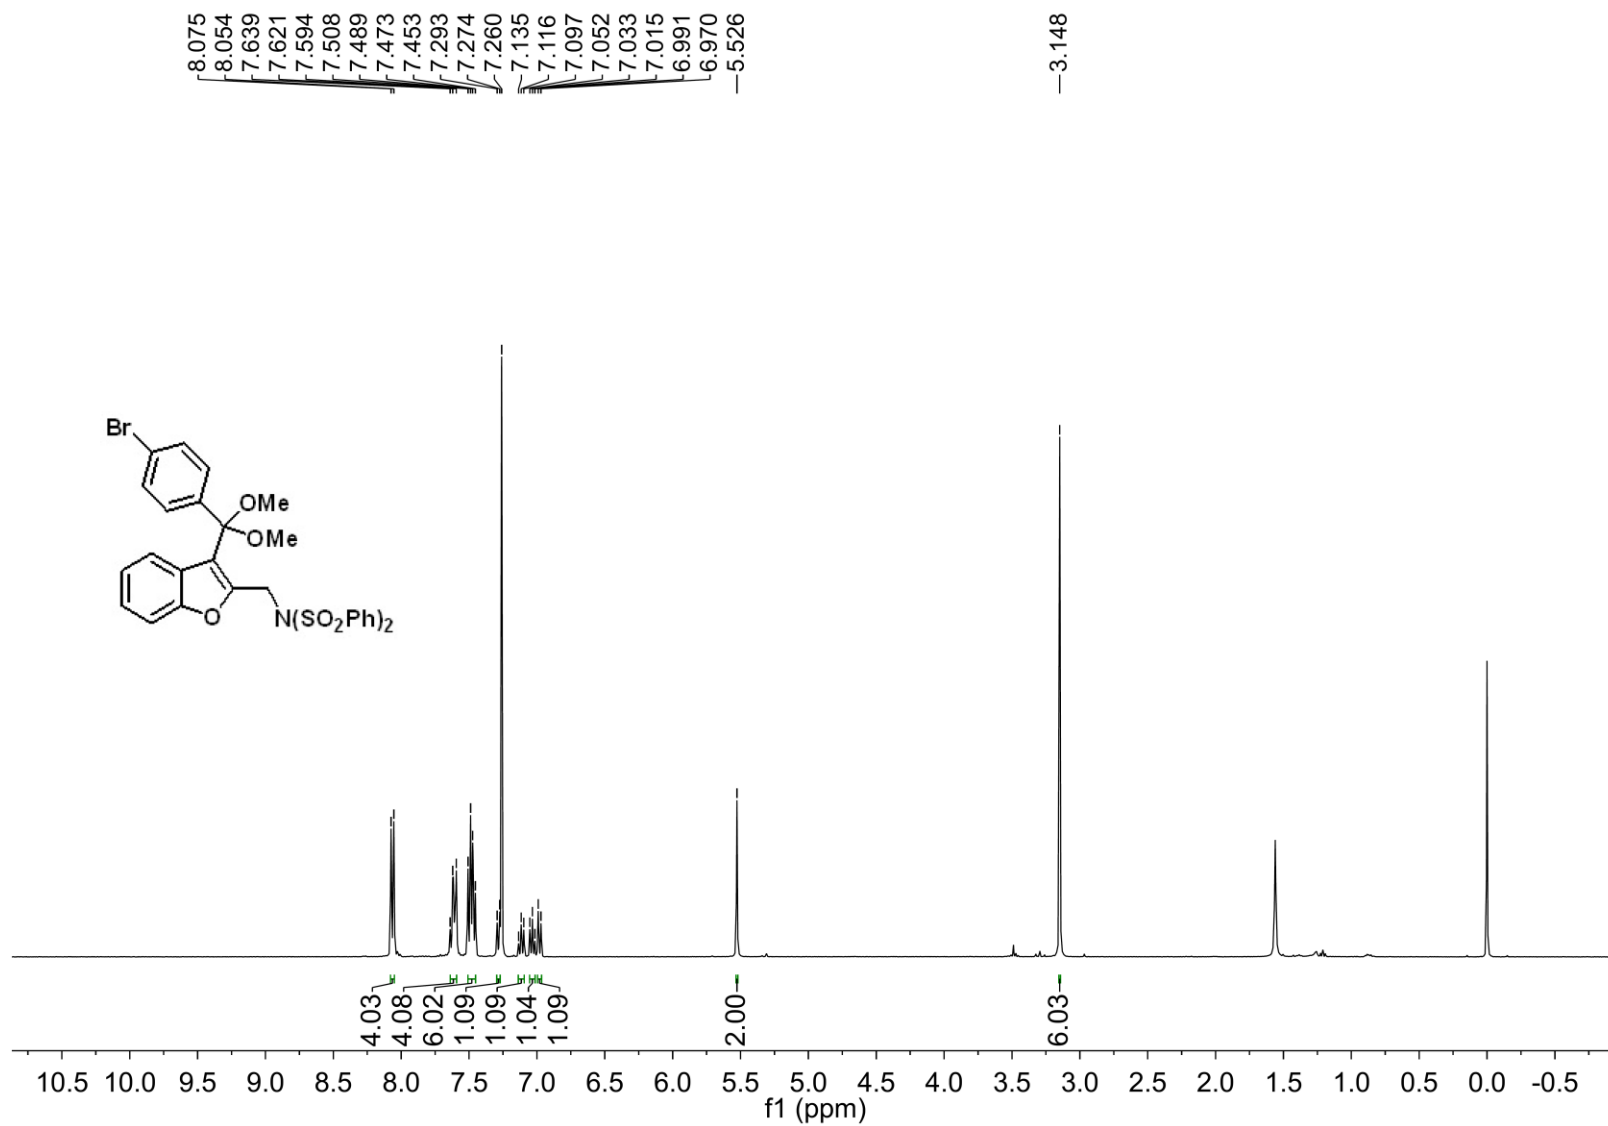

<sup>13</sup>C spectra of compound 3l:

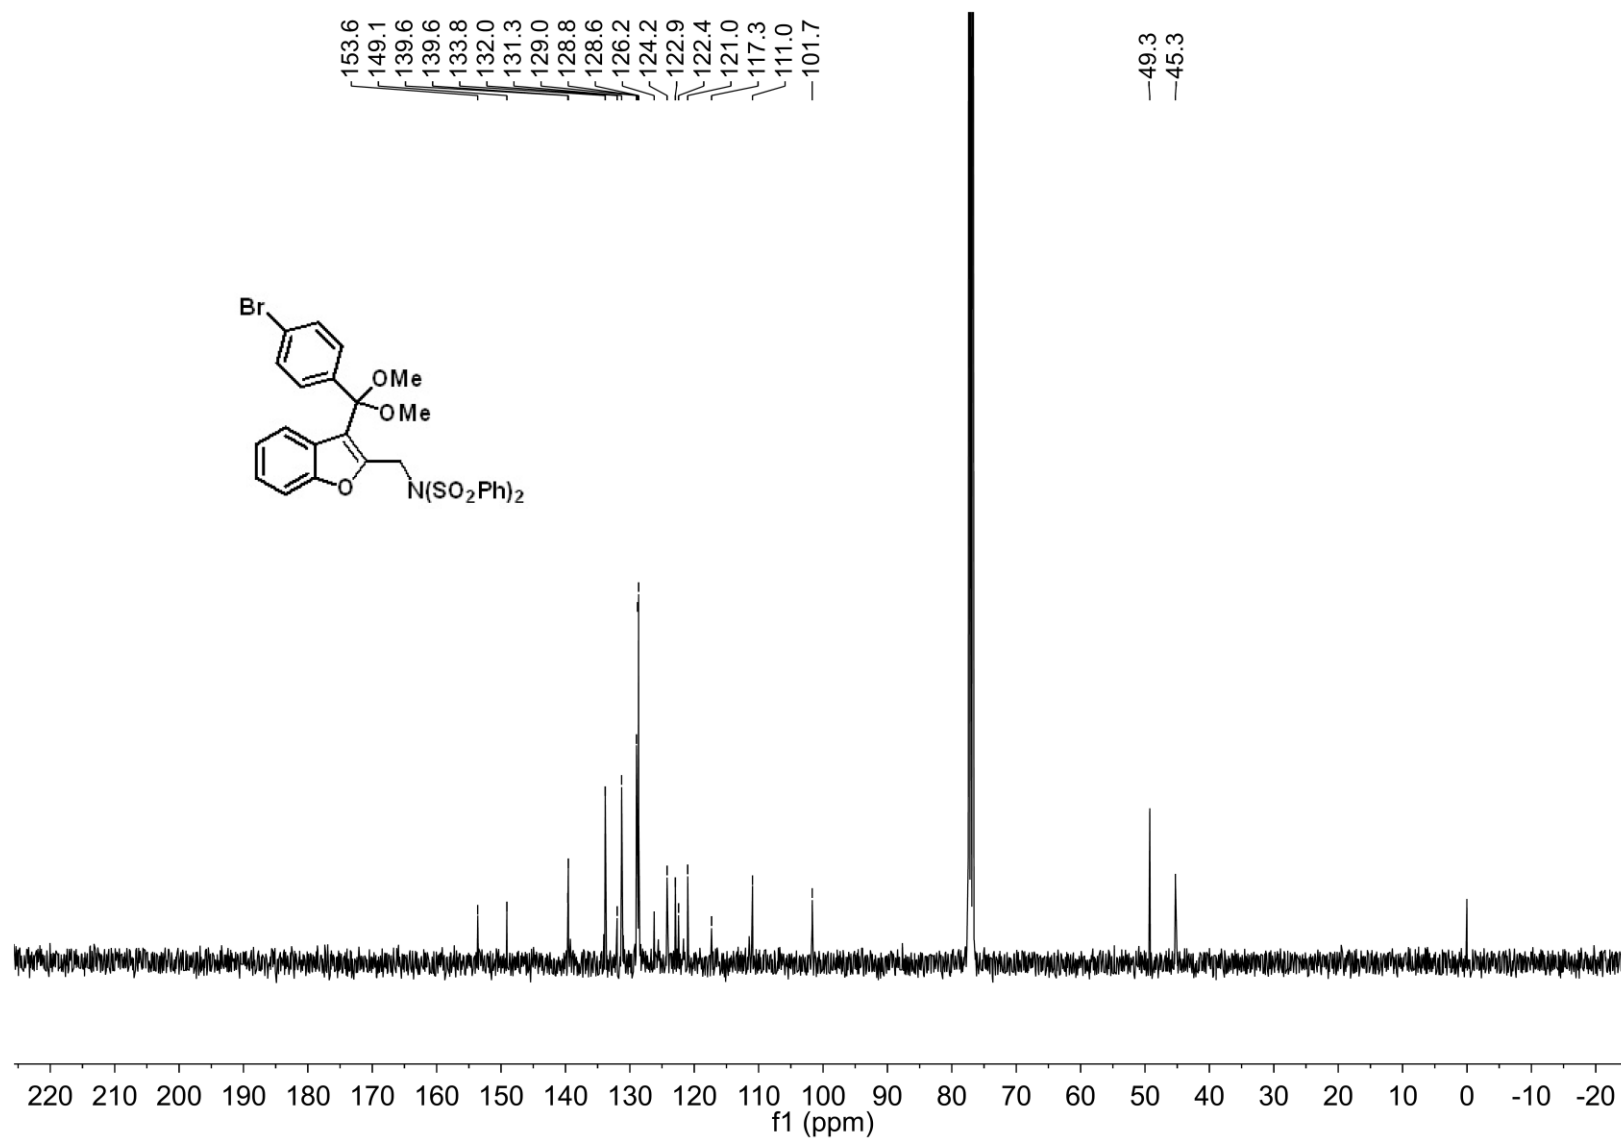

<sup>1</sup>H spectra of compound 3m:

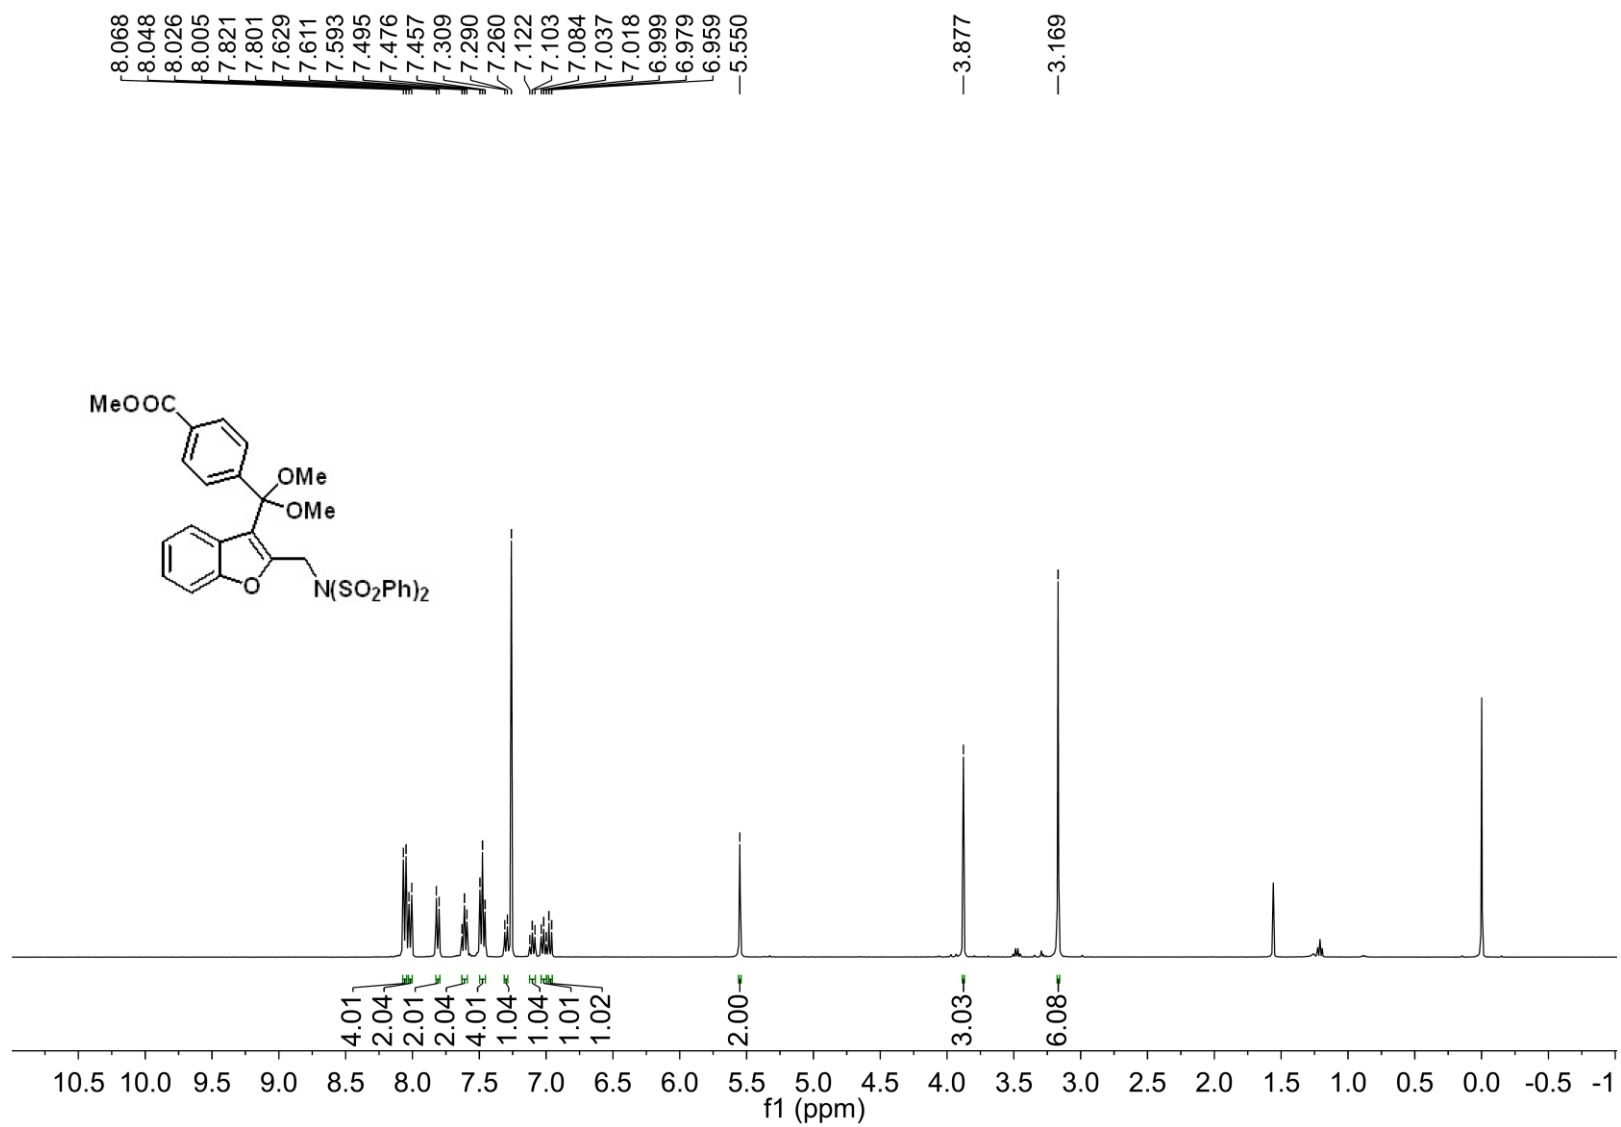

<sup>13</sup>C spectra of compound 3m:

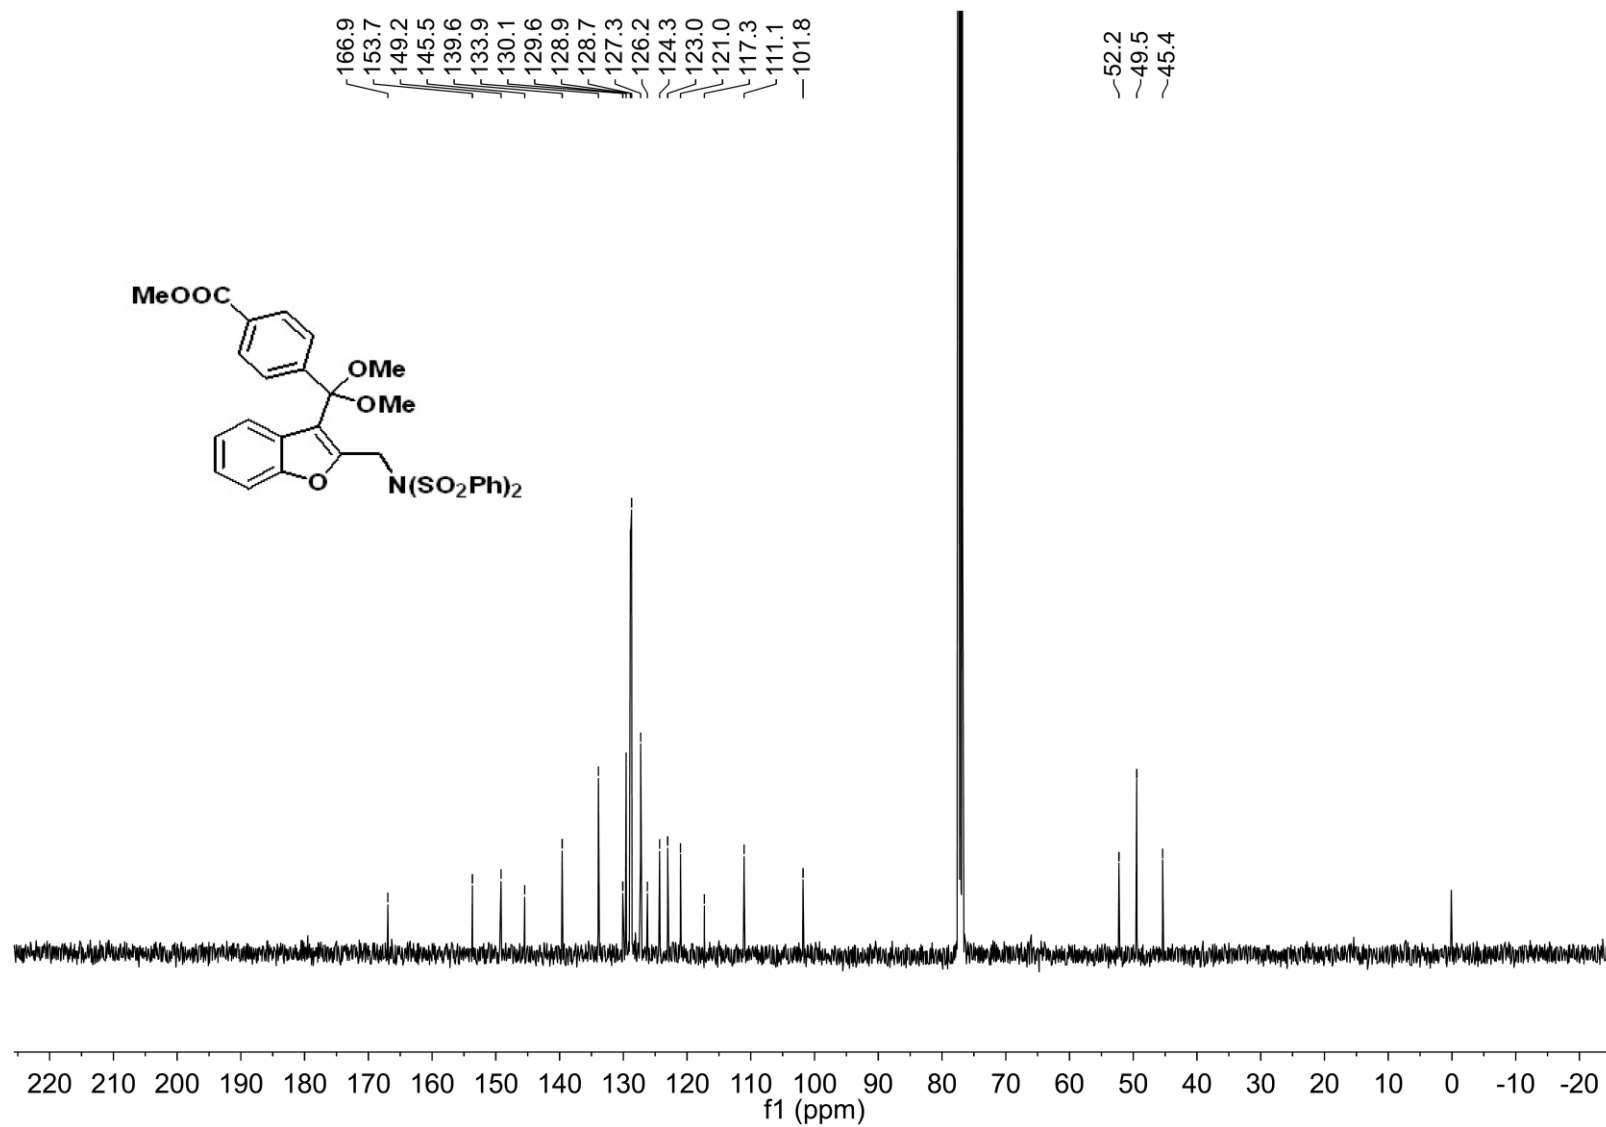

<sup>1</sup>H spectra of compound 3n:

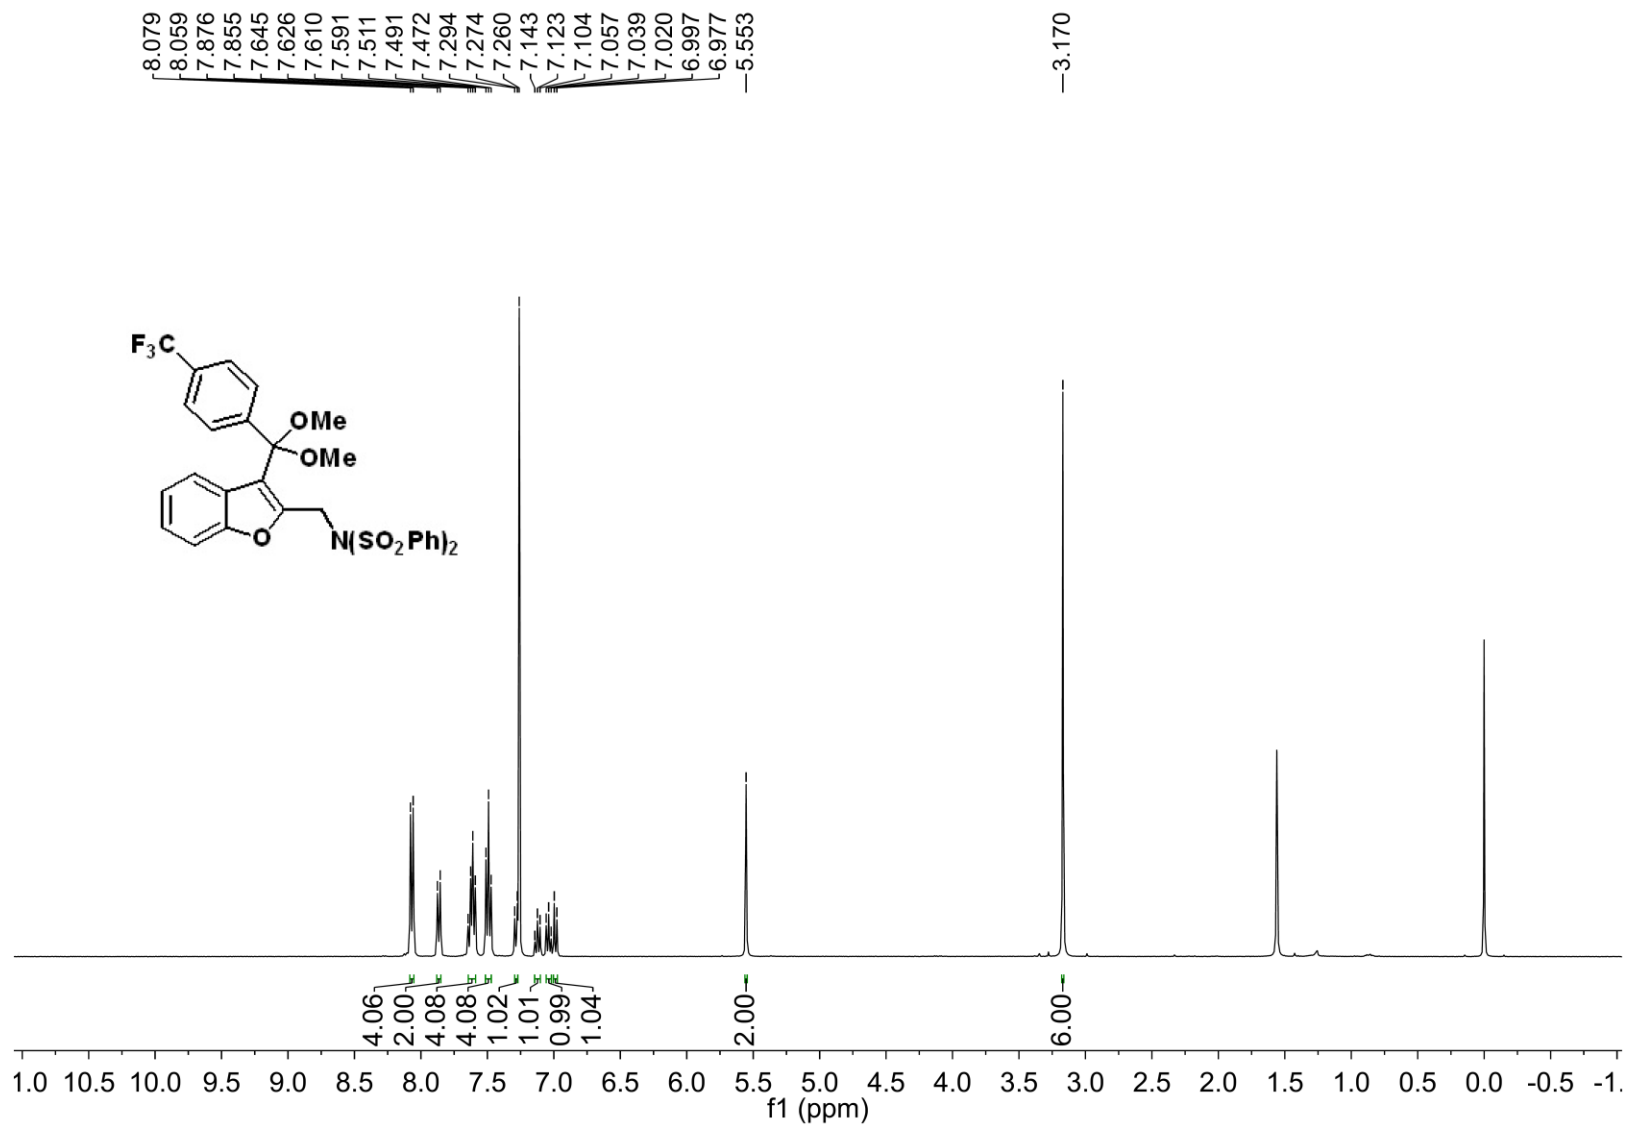

<sup>13</sup>C spectra of compound 3n:

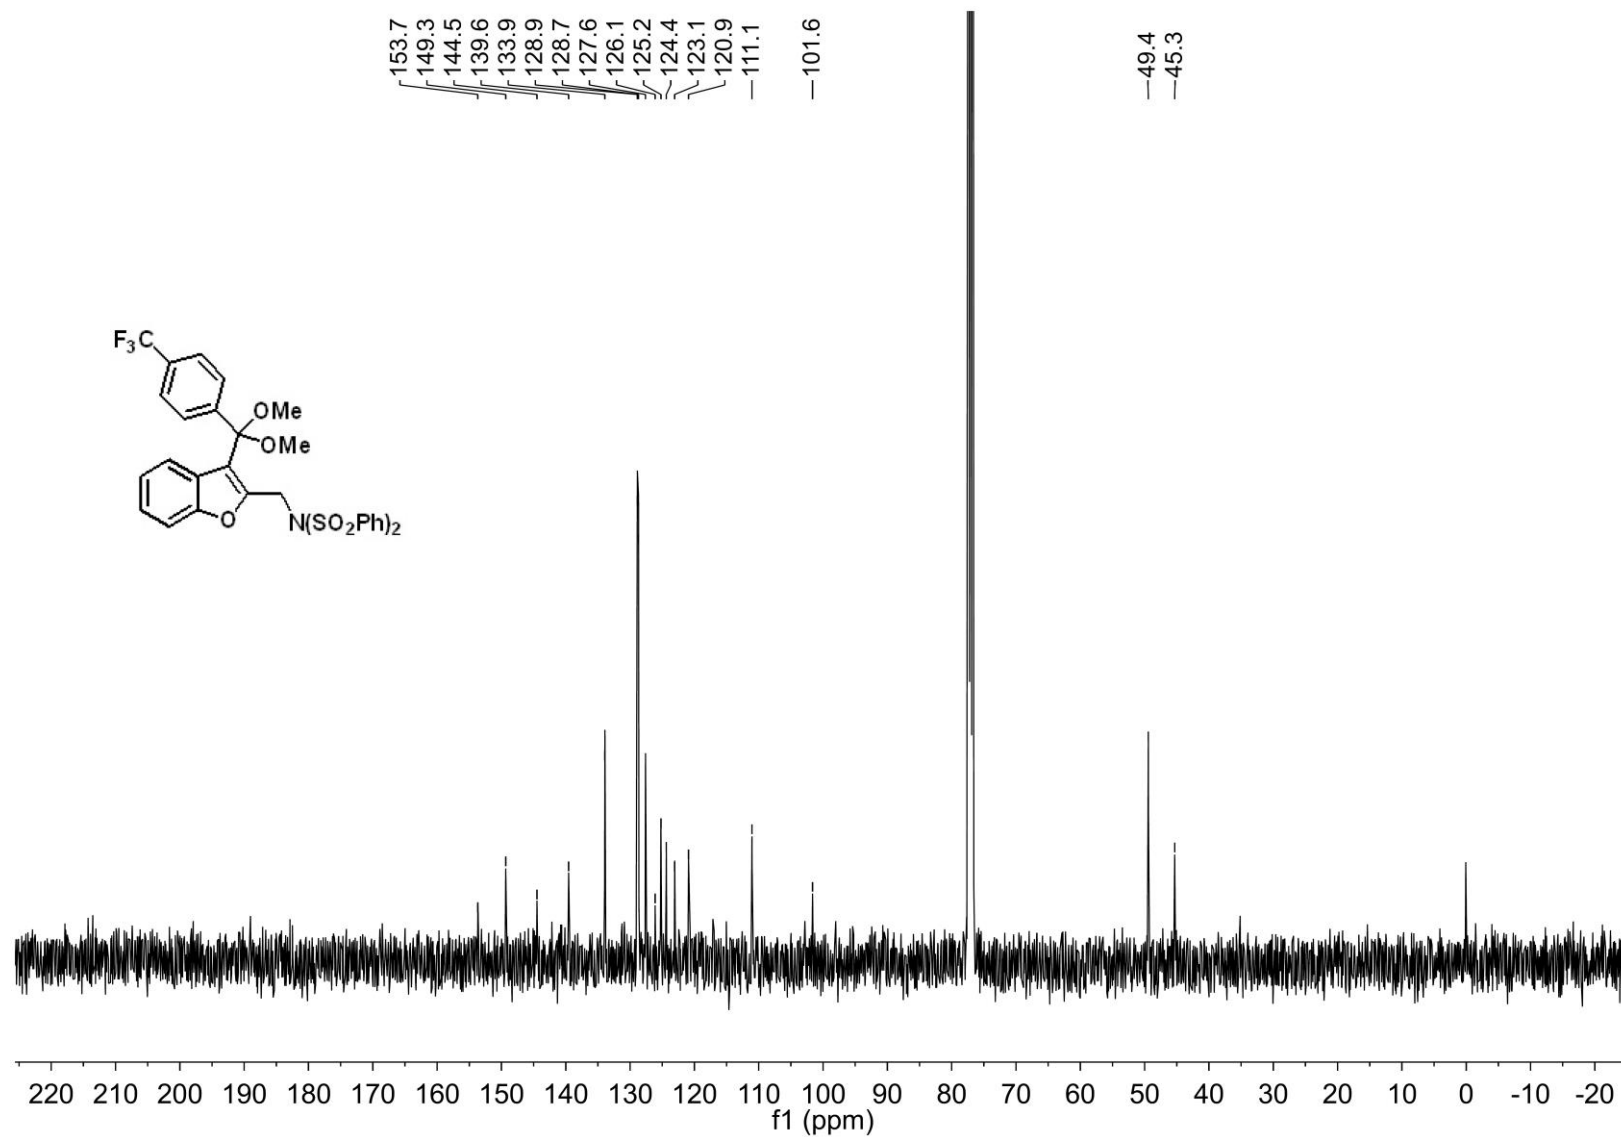

<sup>1</sup>H spectra of compound 3o:

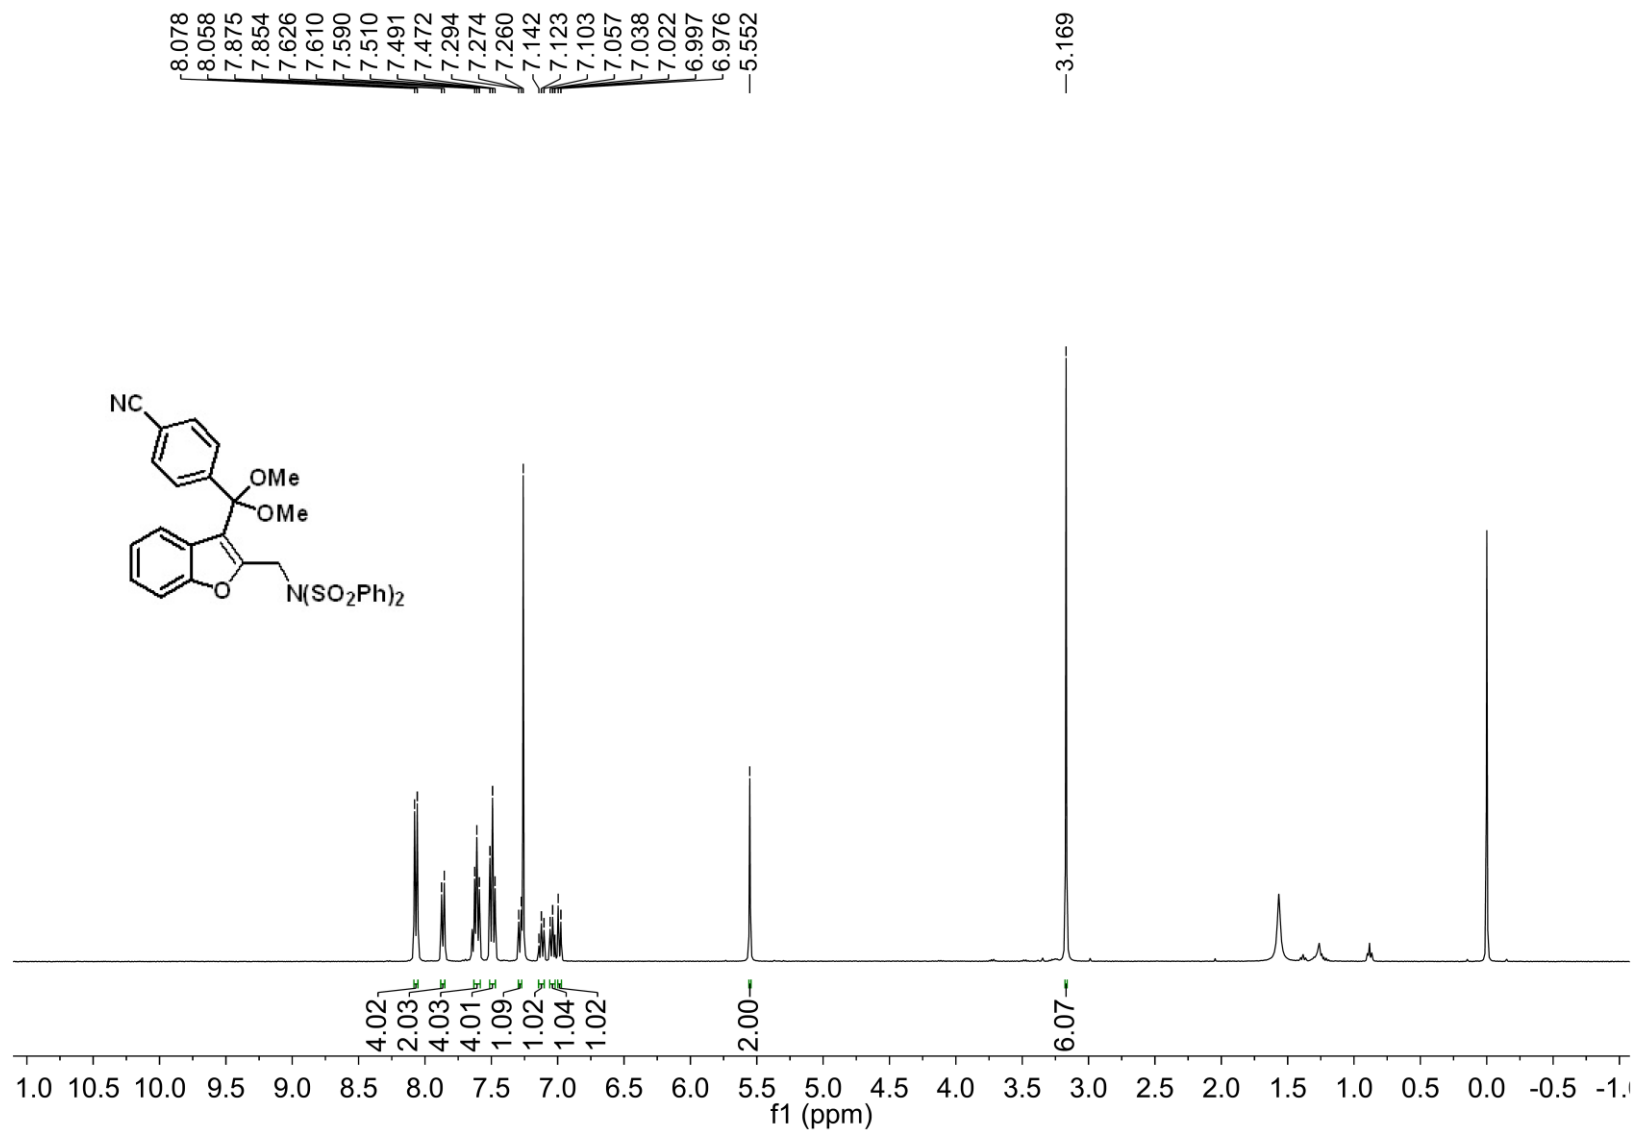

<sup>13</sup>C spectra of compound 3o:

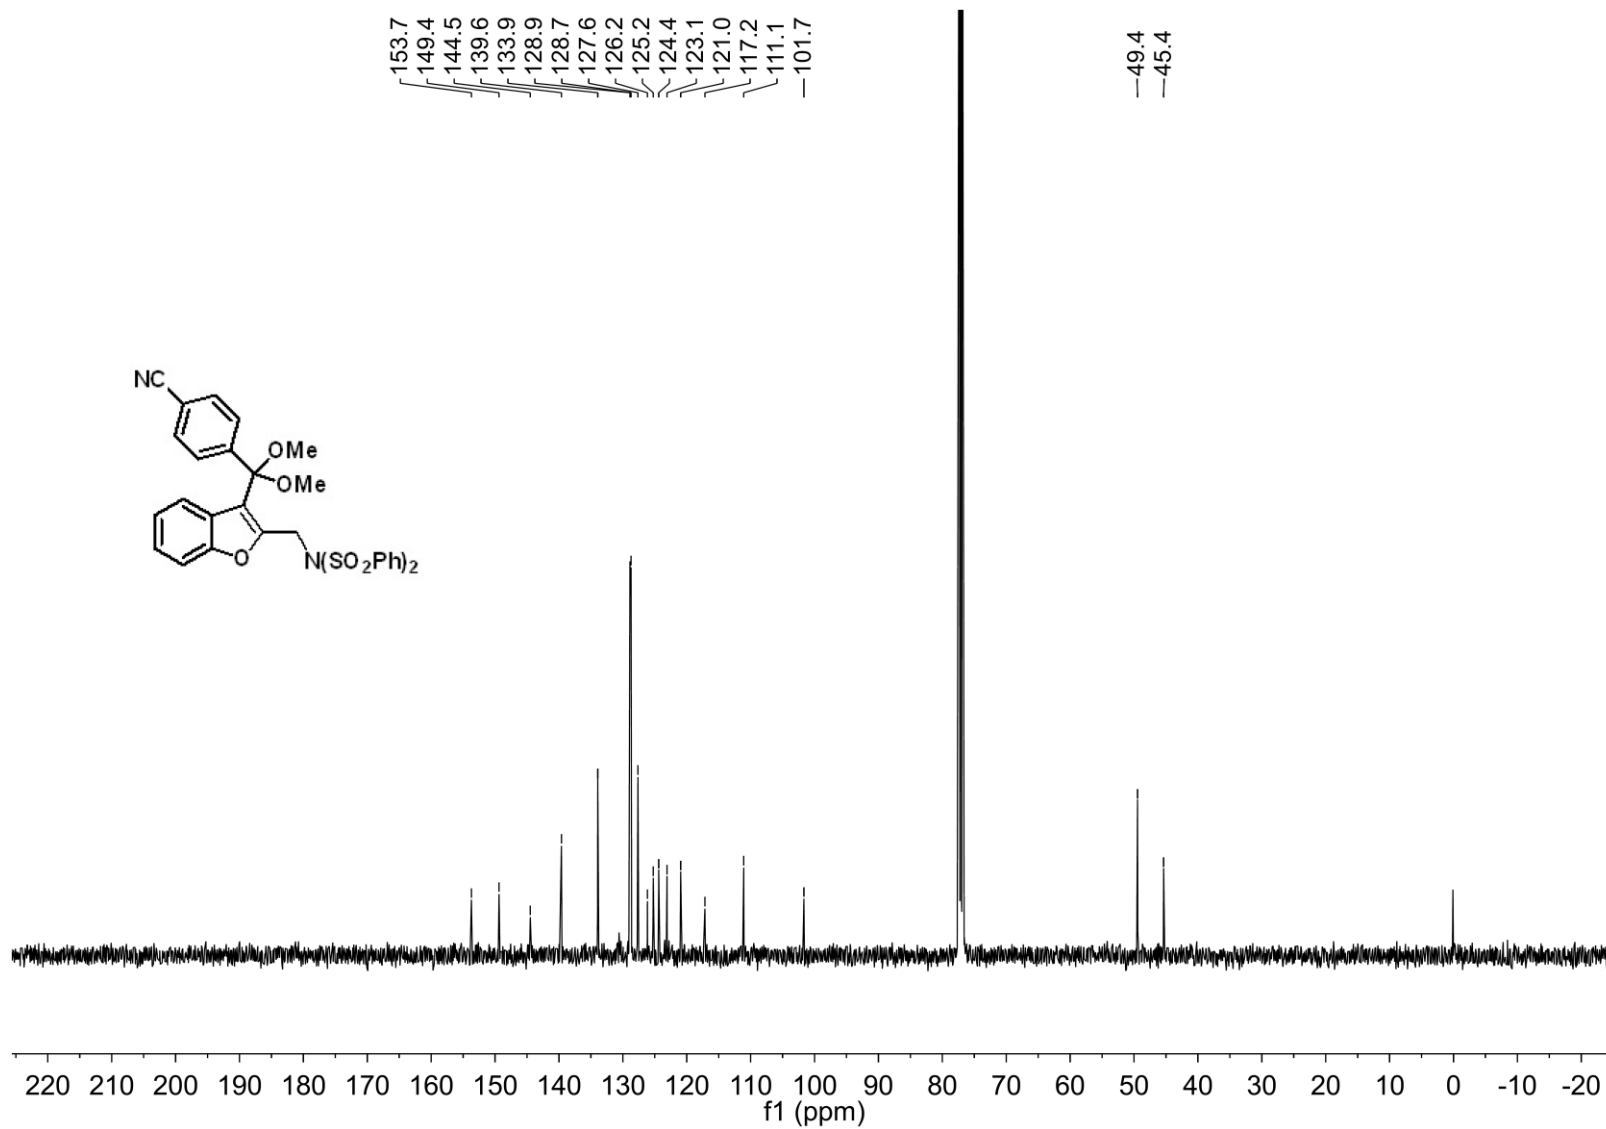



<sup>1</sup>H spectra of compound 3p:

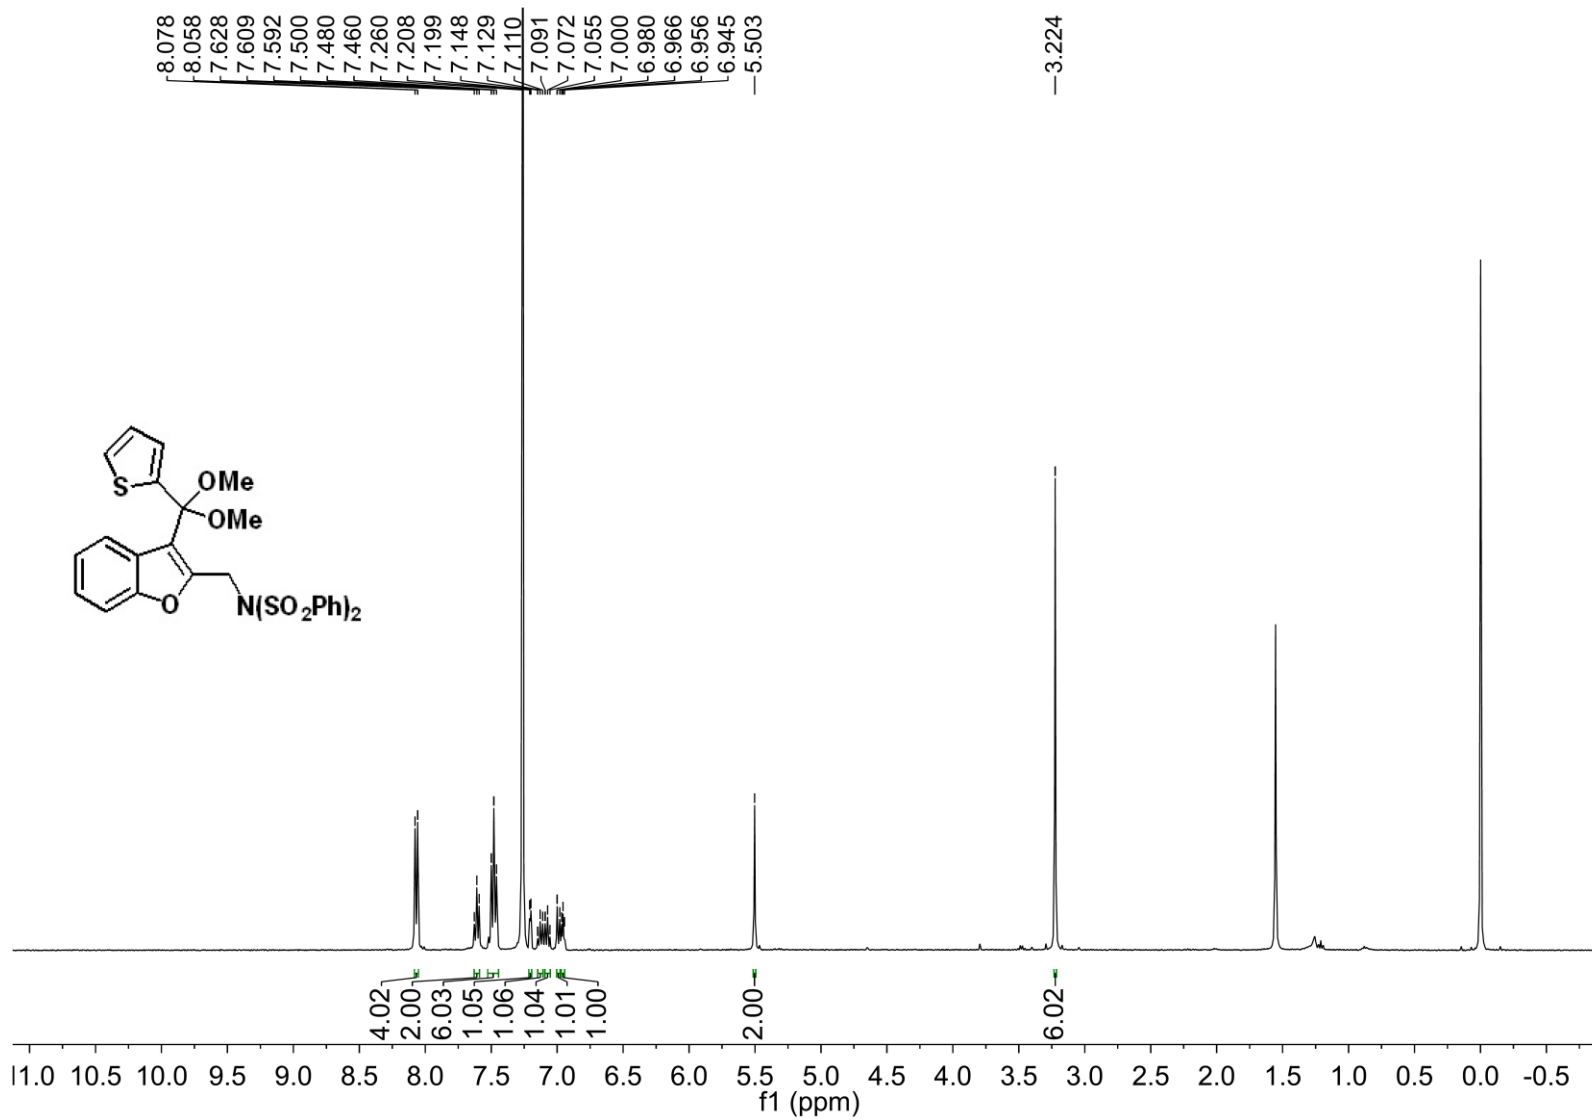

<sup>13</sup>C spectra of compound 3p:

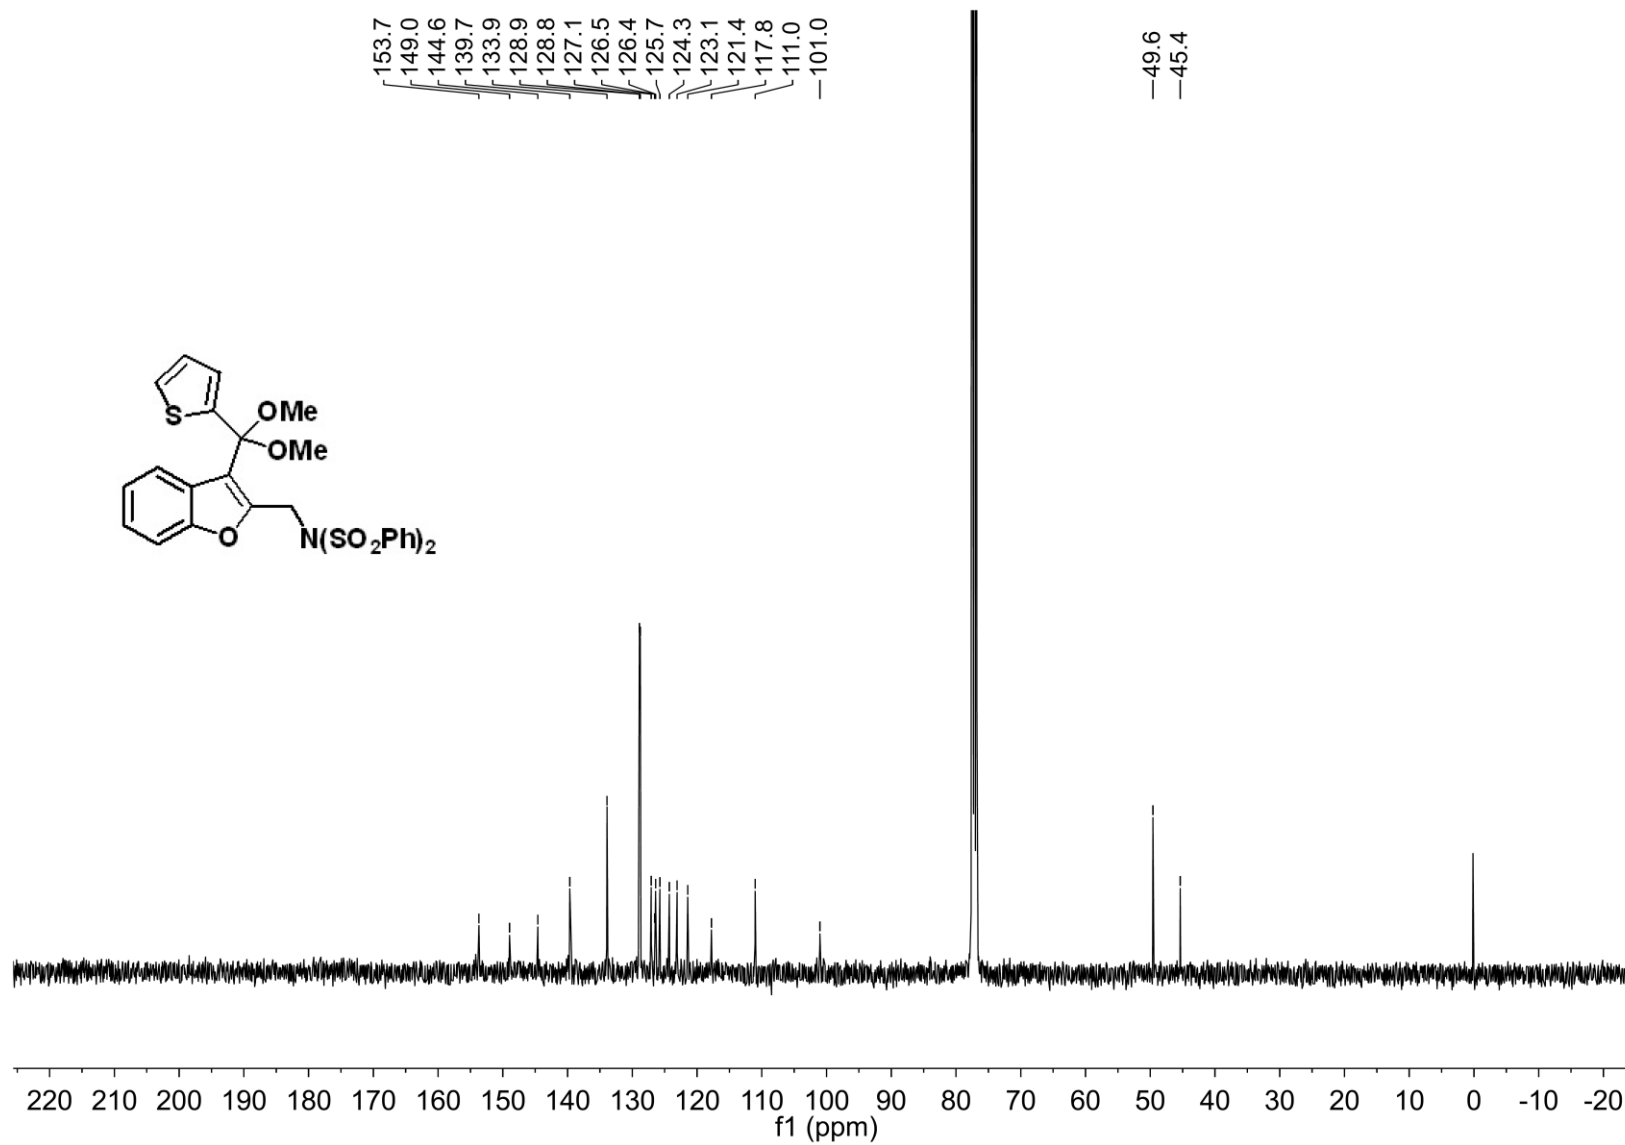

<sup>1</sup>H spectra of compound 3r:

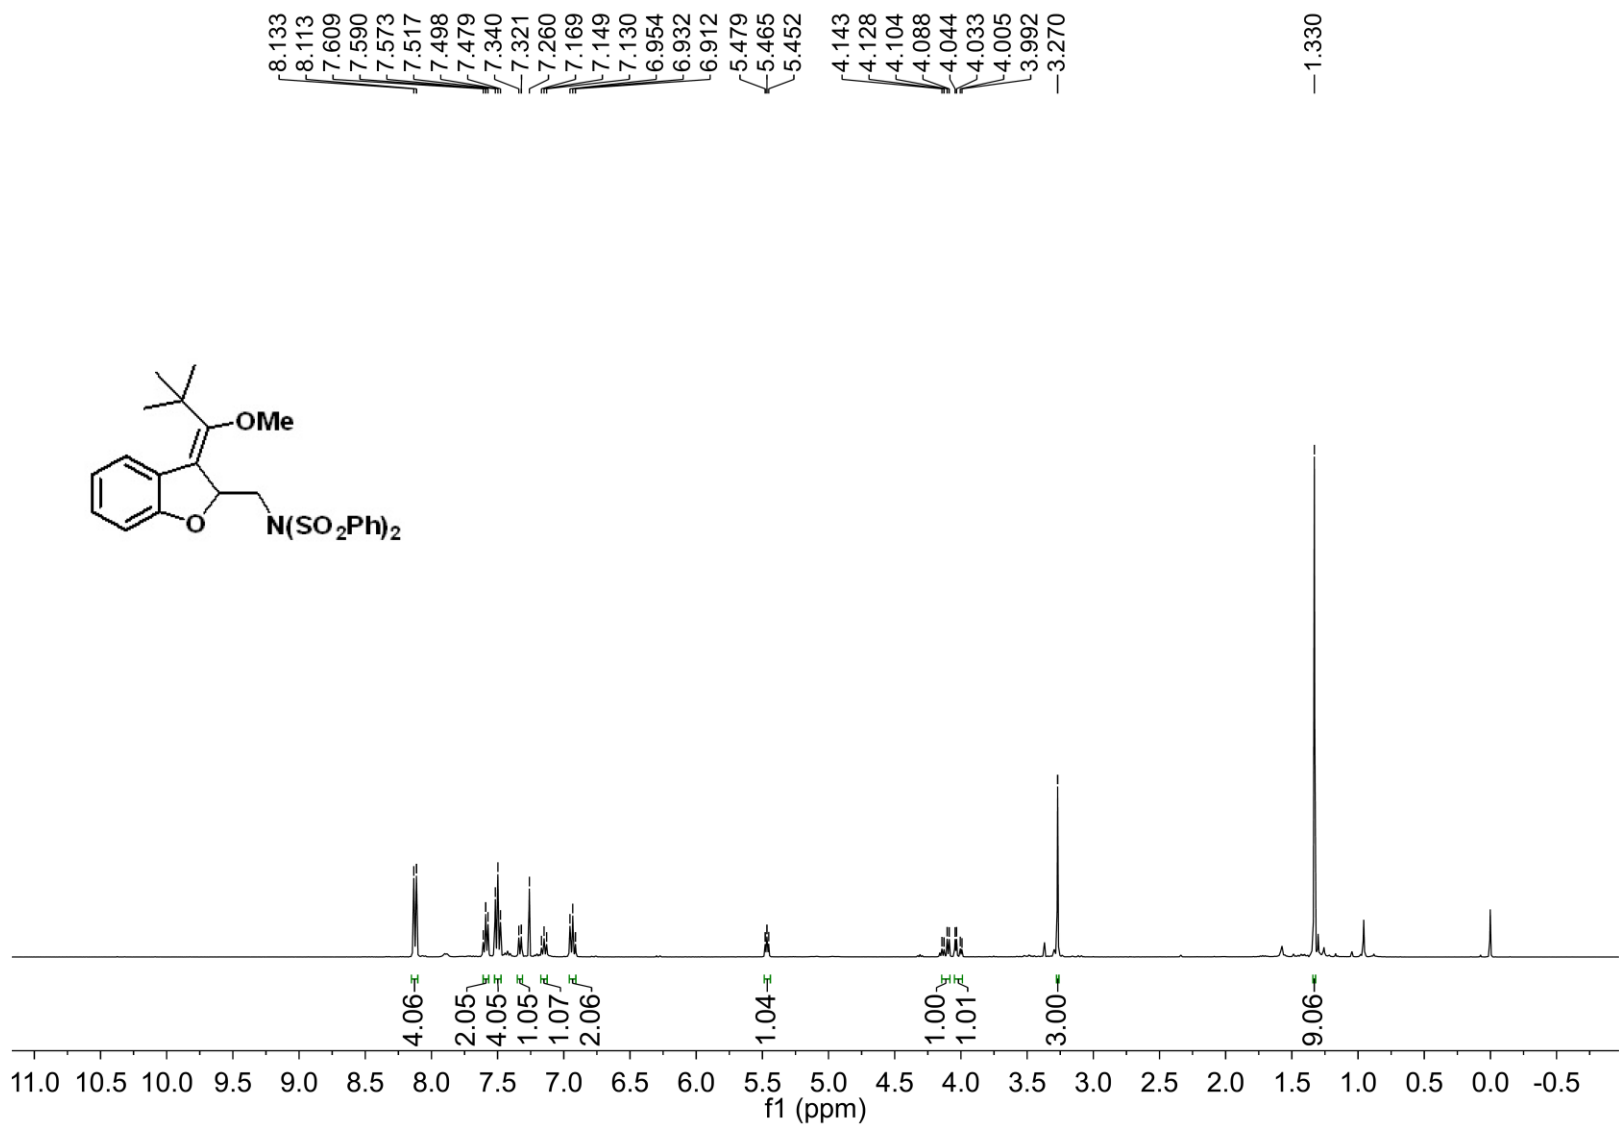

<sup>13</sup>C spectra of compound 3r:

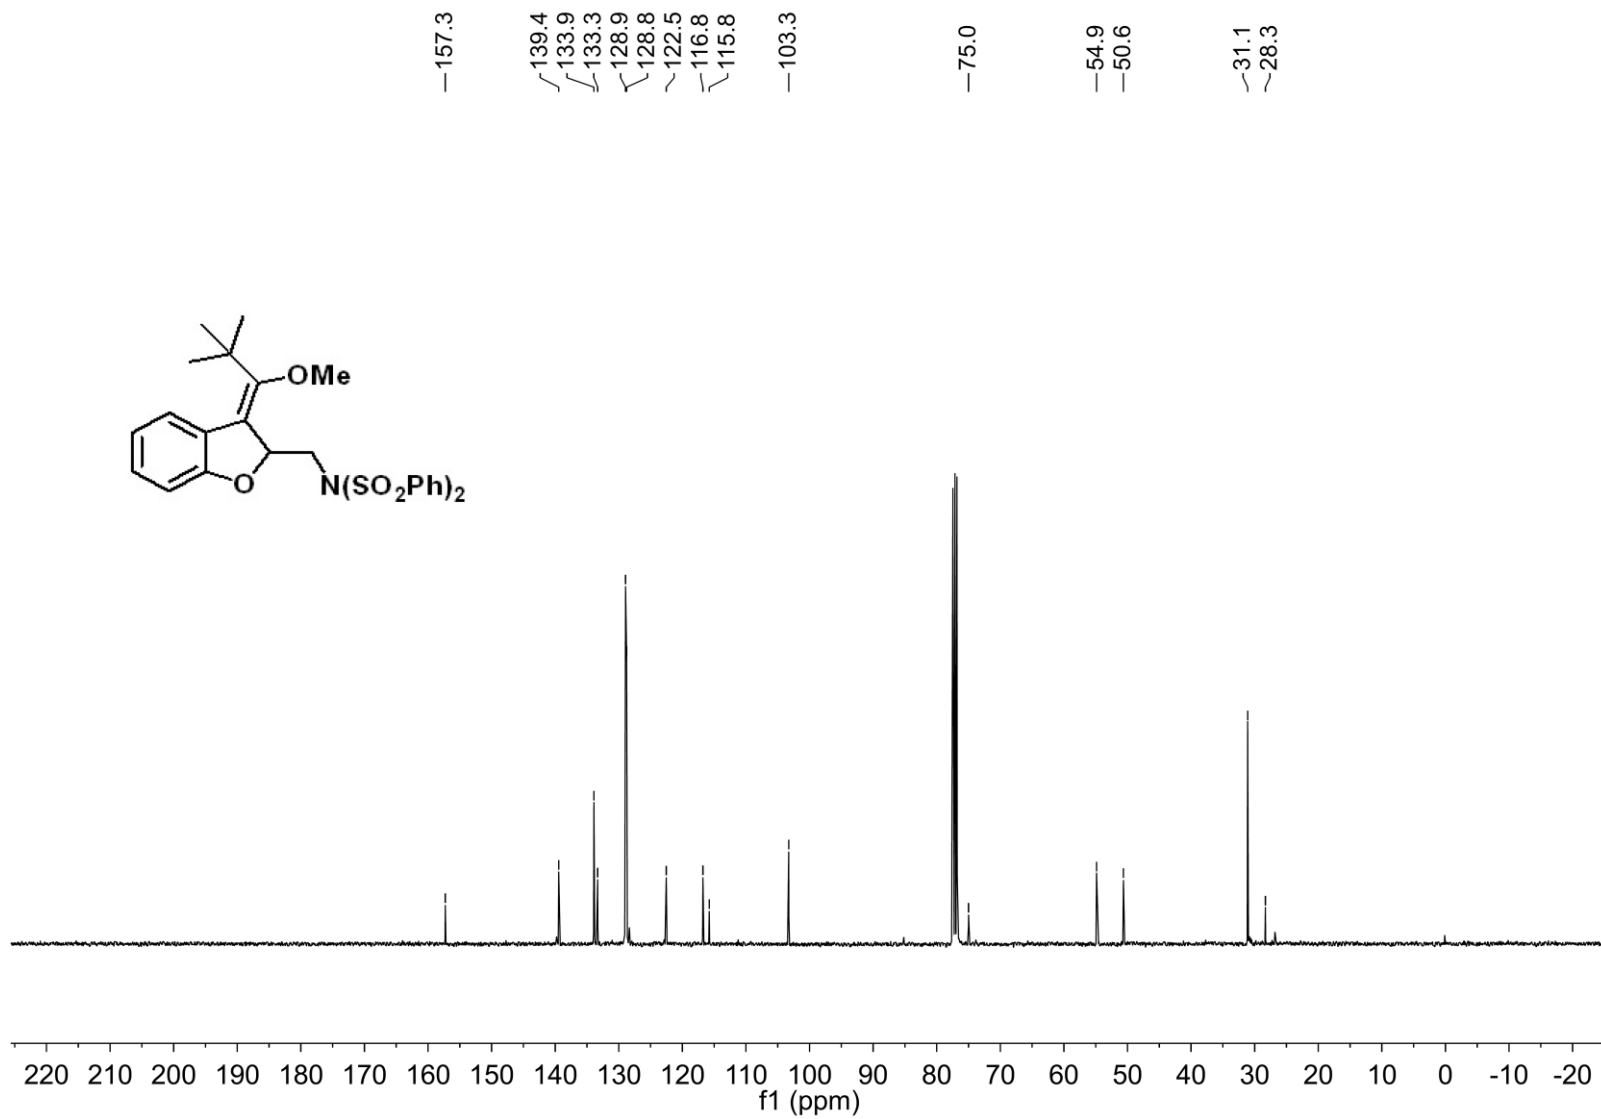

<sup>1</sup>H spectra of compound 3s:

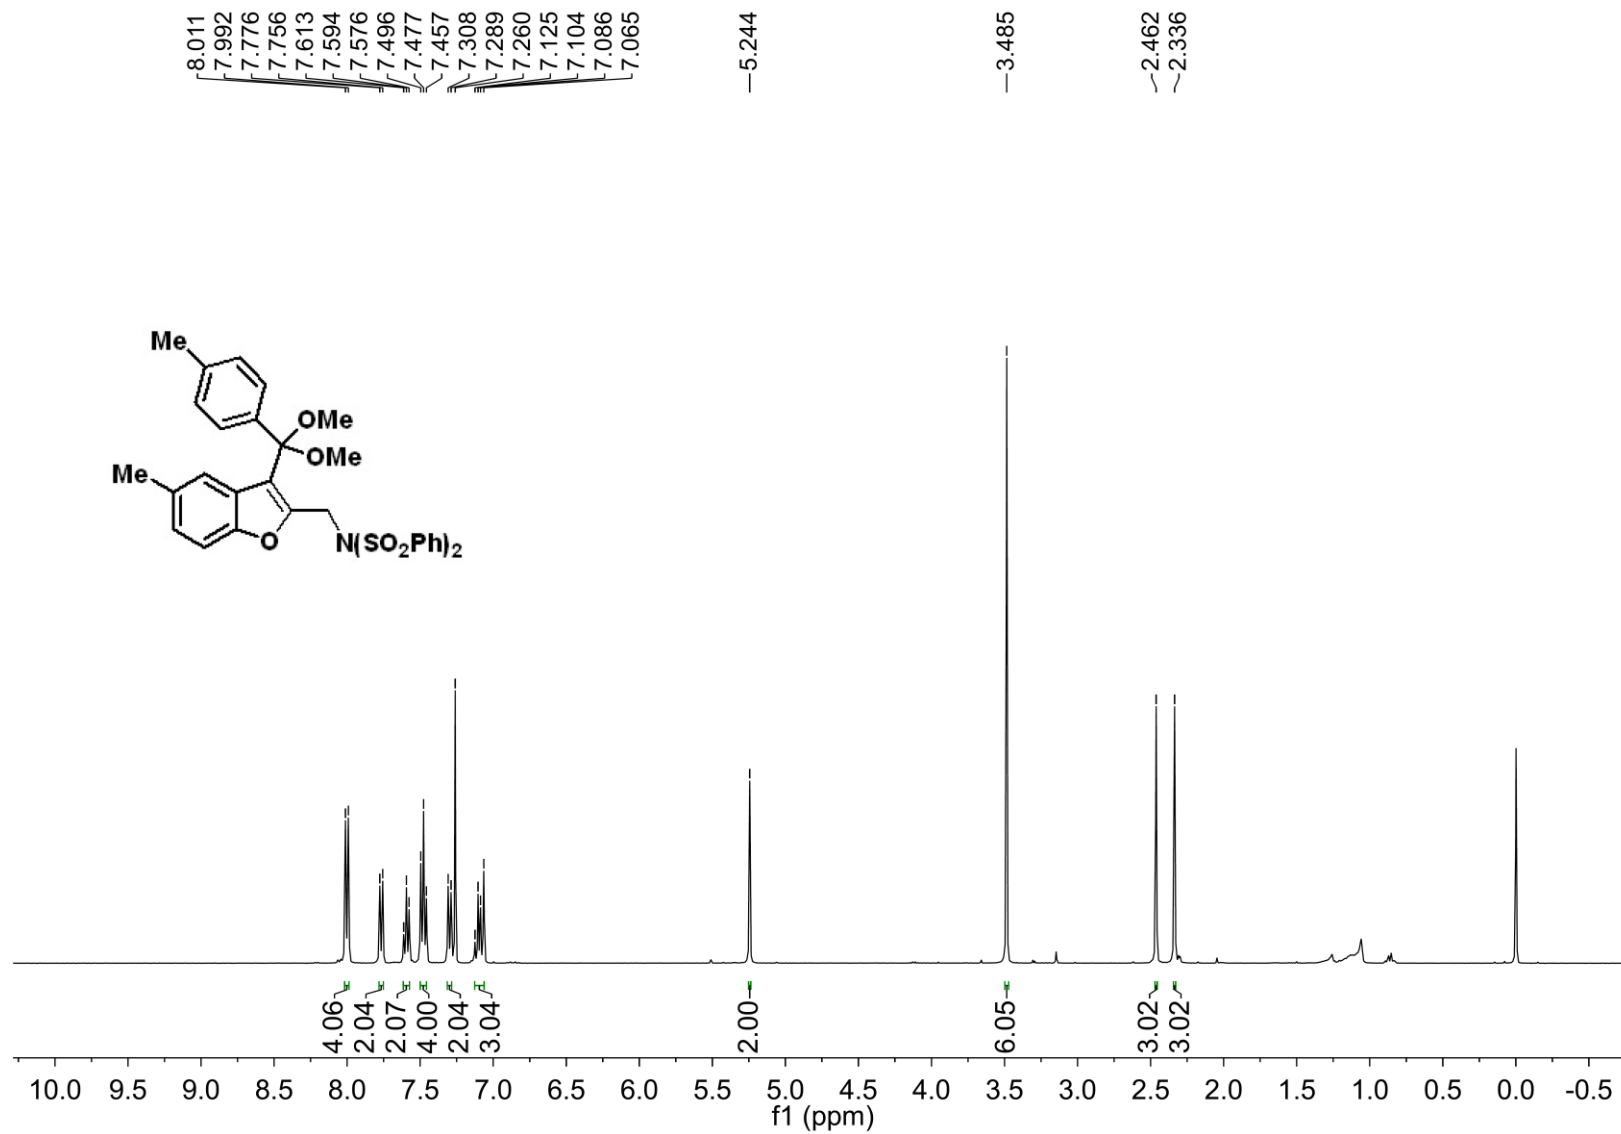

<sup>13</sup>C spectra of compound 3s:

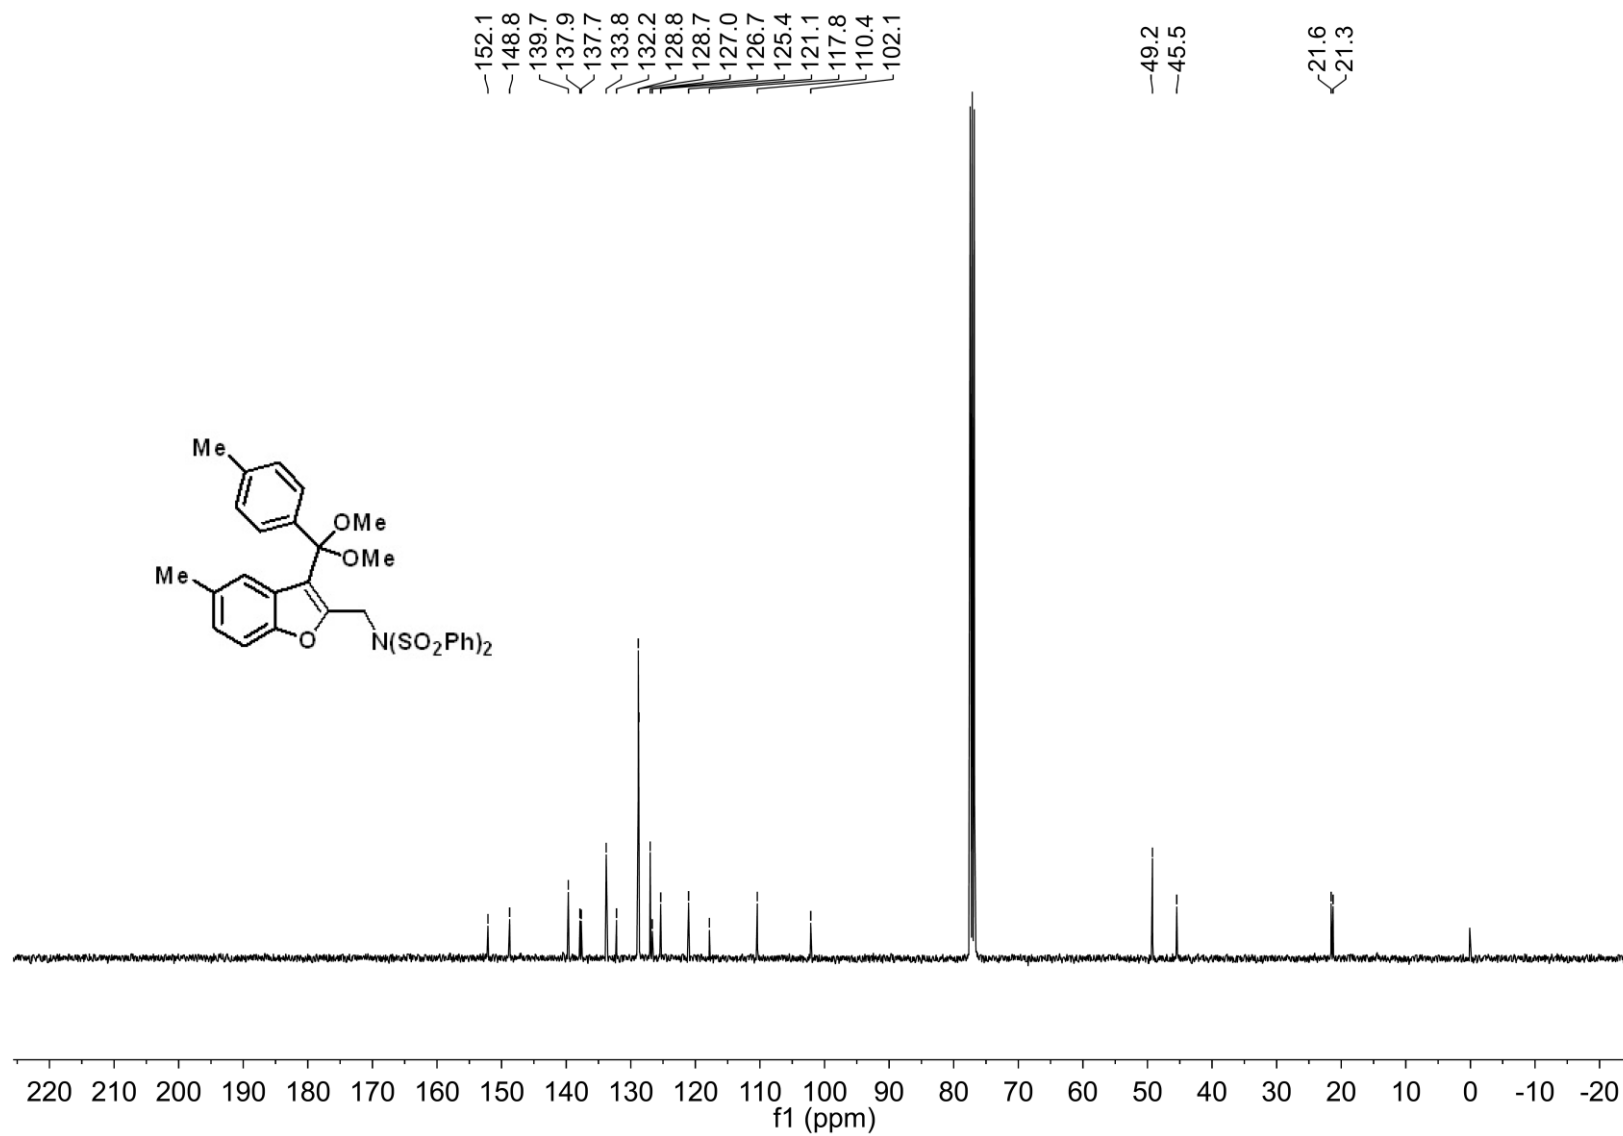

<sup>1</sup>H spectra of compound 3t:

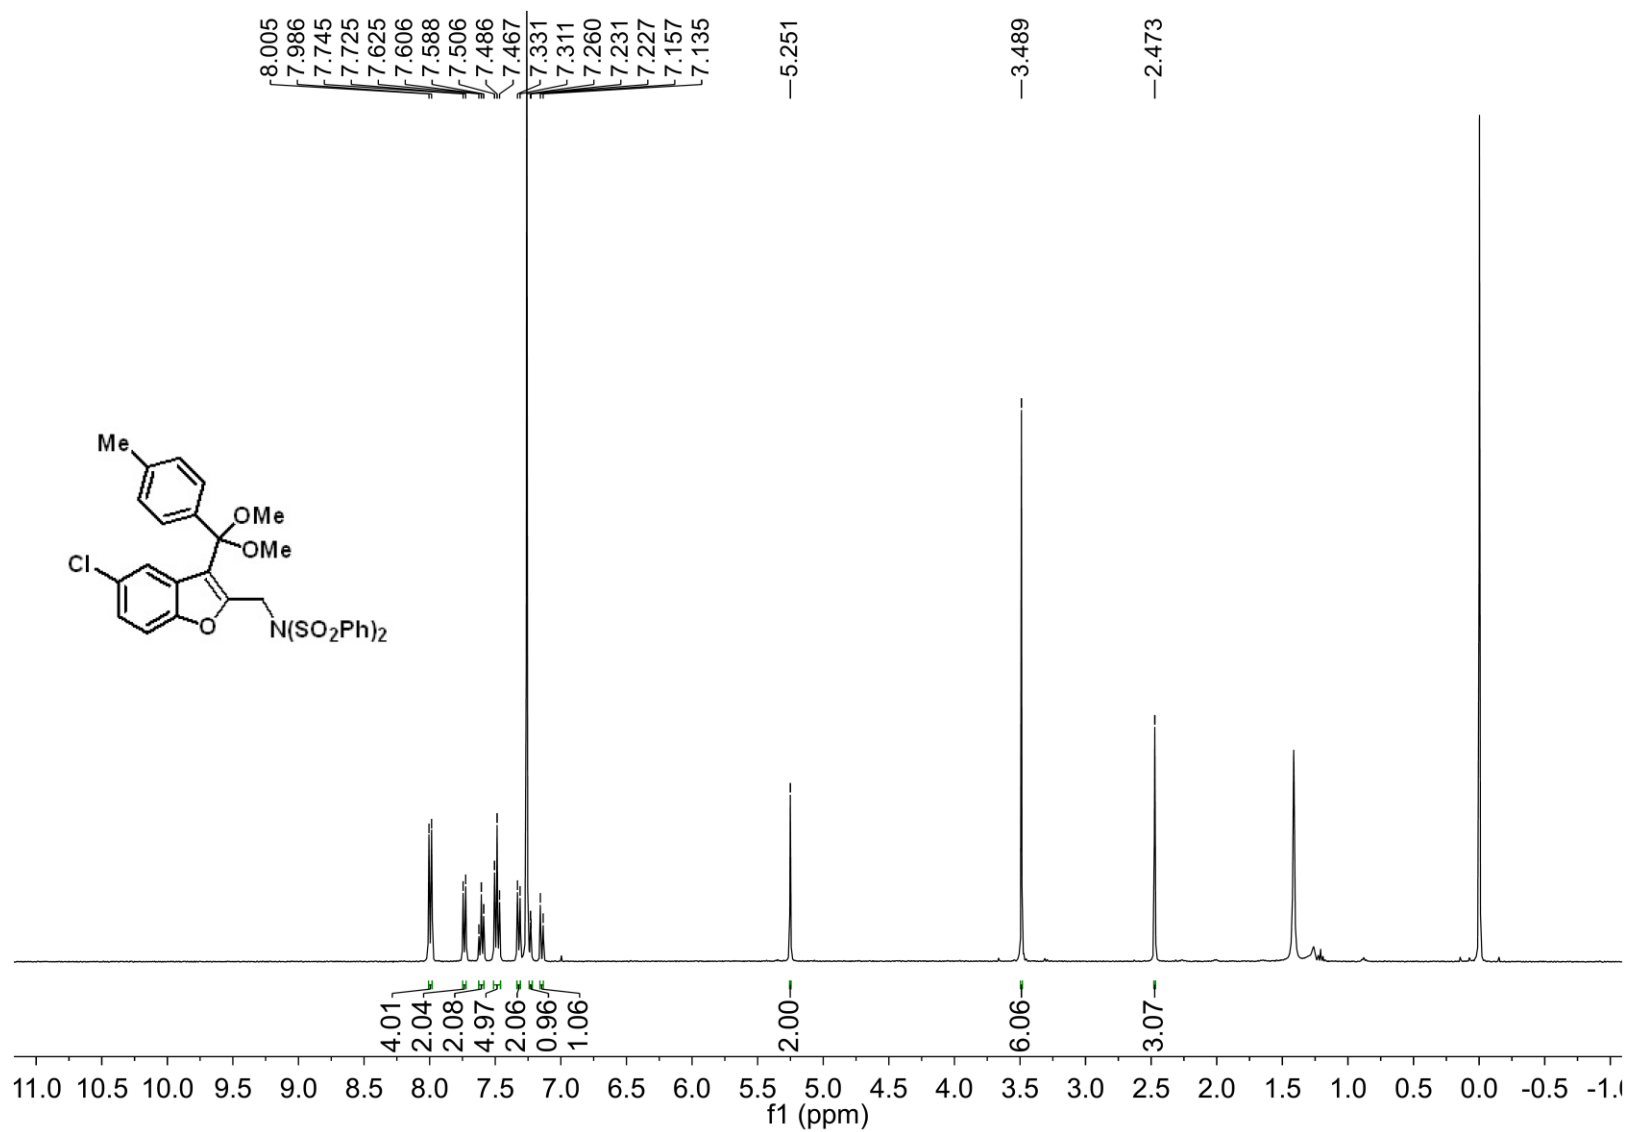

<sup>13</sup>C spectra of compound 3t:

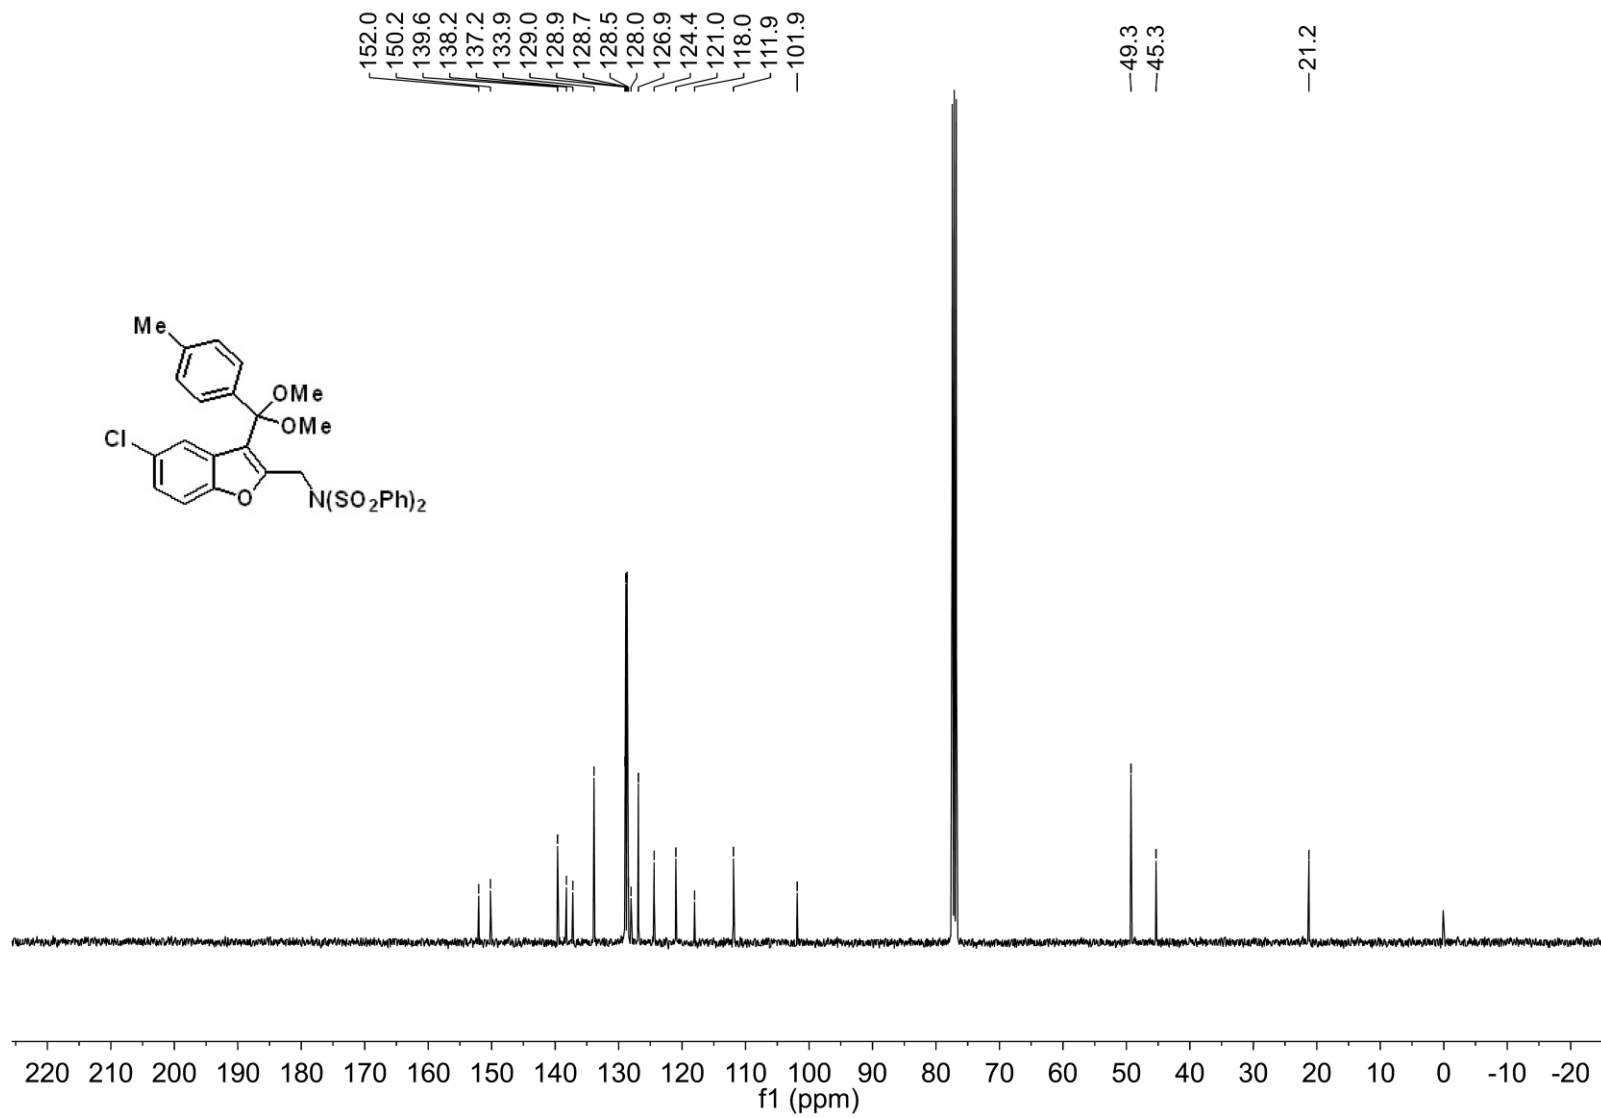



<sup>1</sup>H spectra of compound 3u:

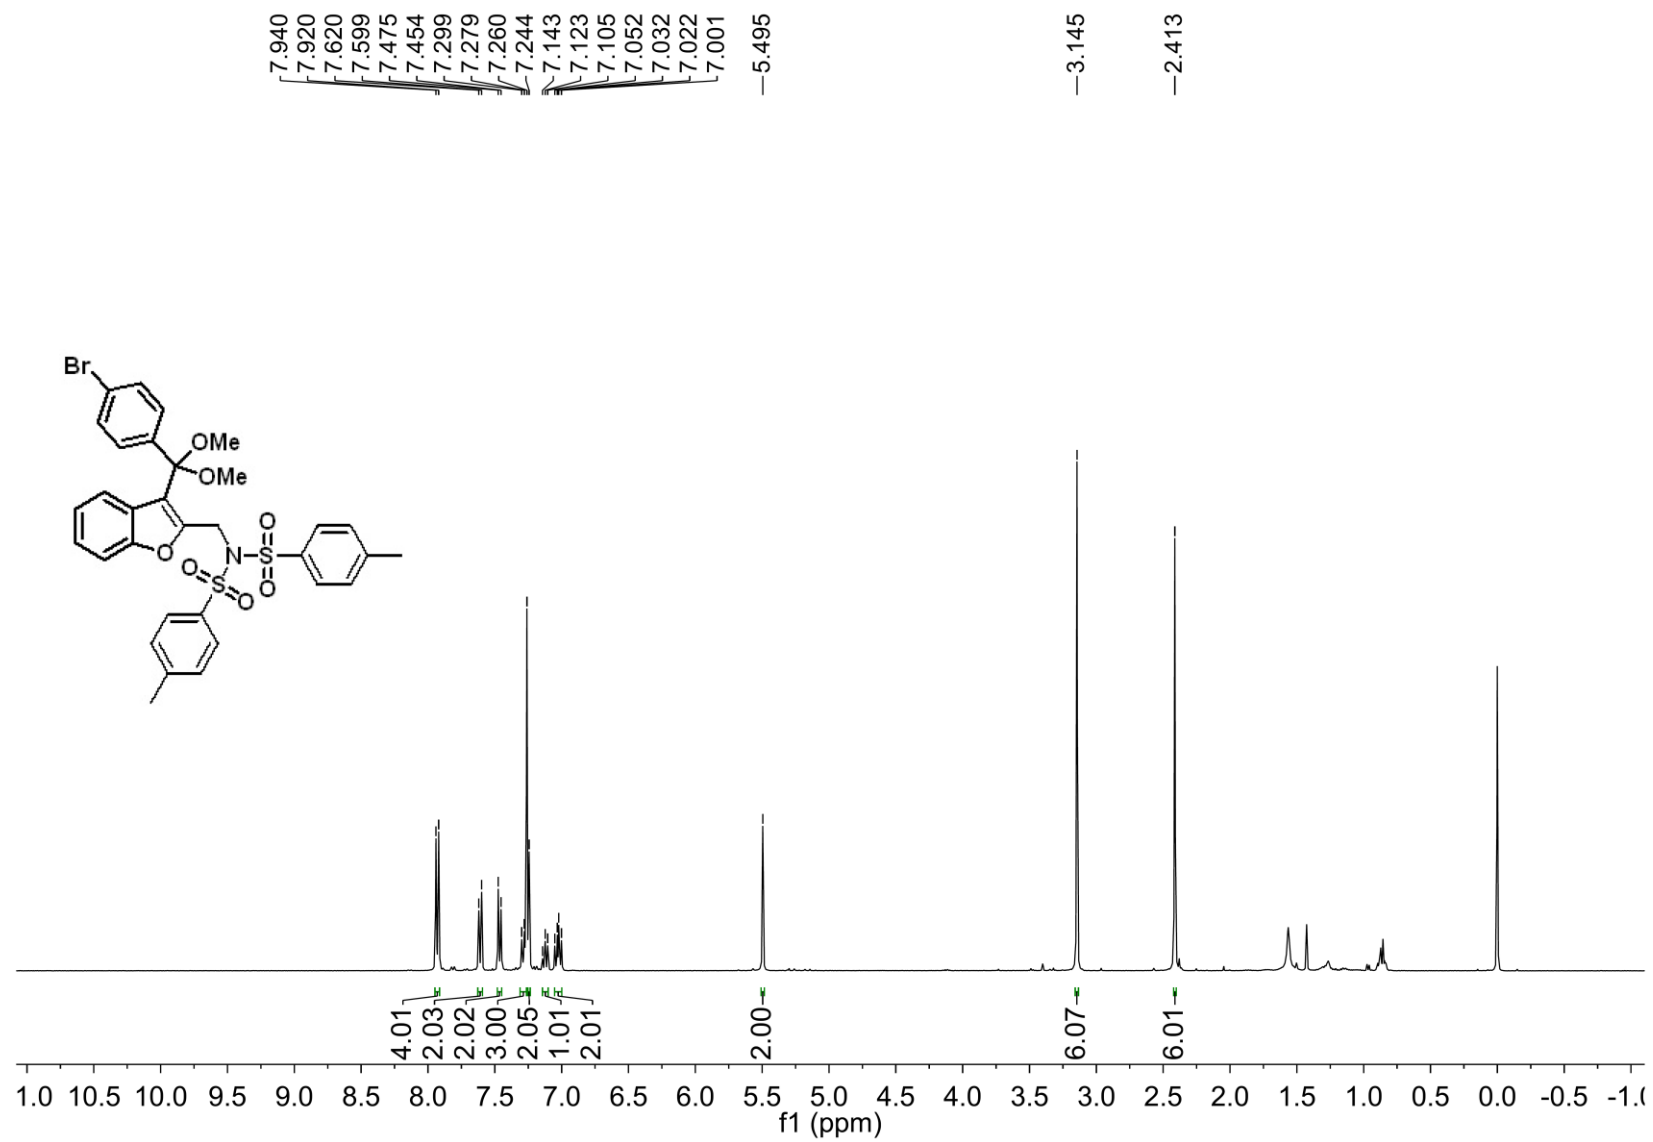

<sup>13</sup>C spectra of compound 3u:

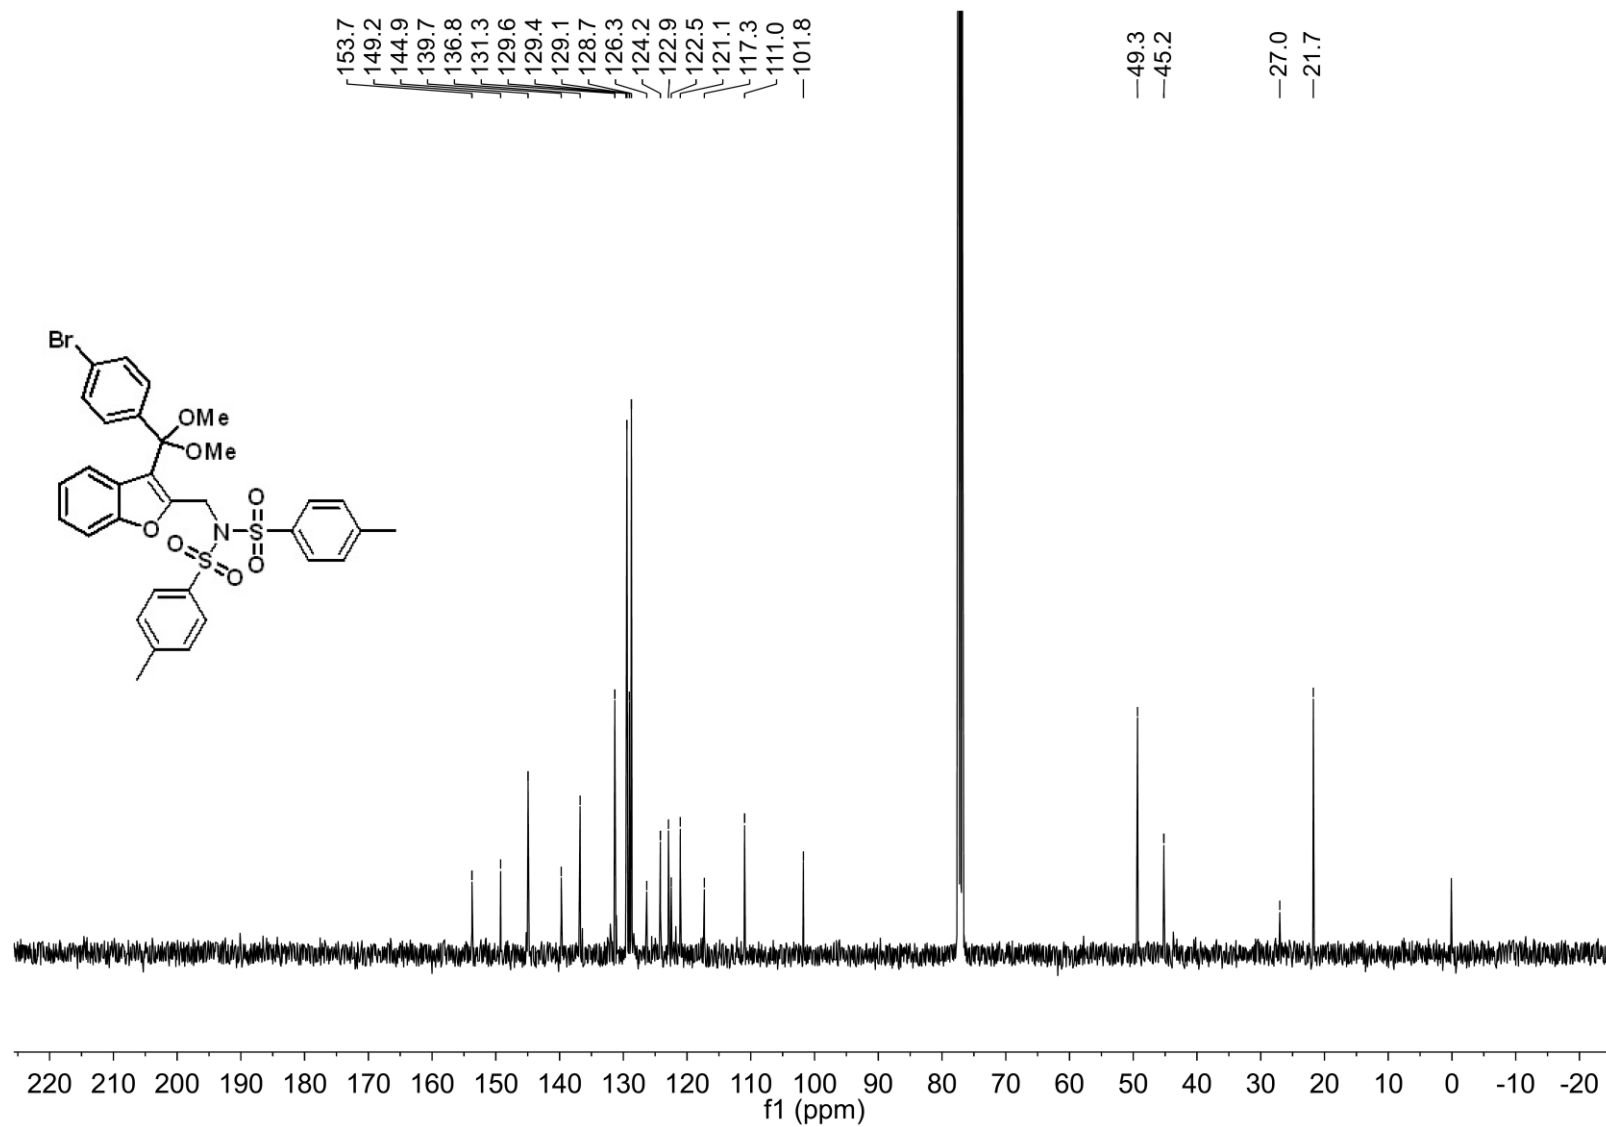

<sup>1</sup>H spectra of compound 3v:

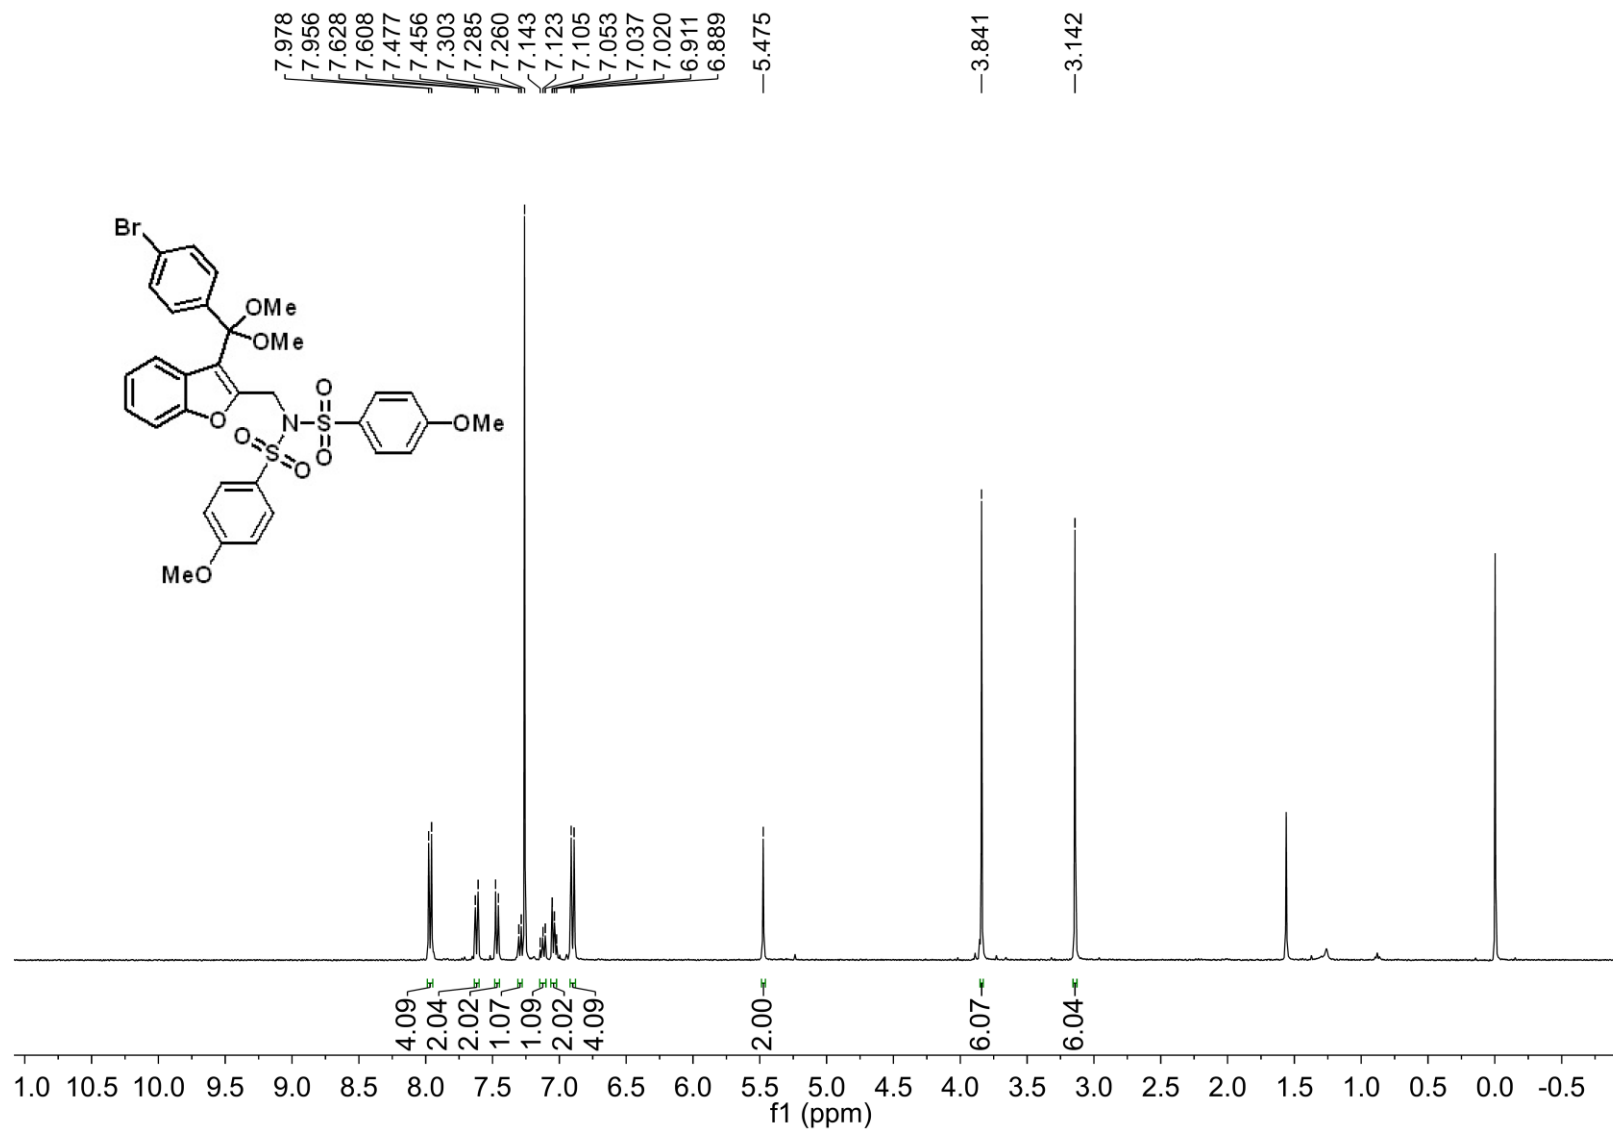

<sup>13</sup>C spectra of compound 3v:

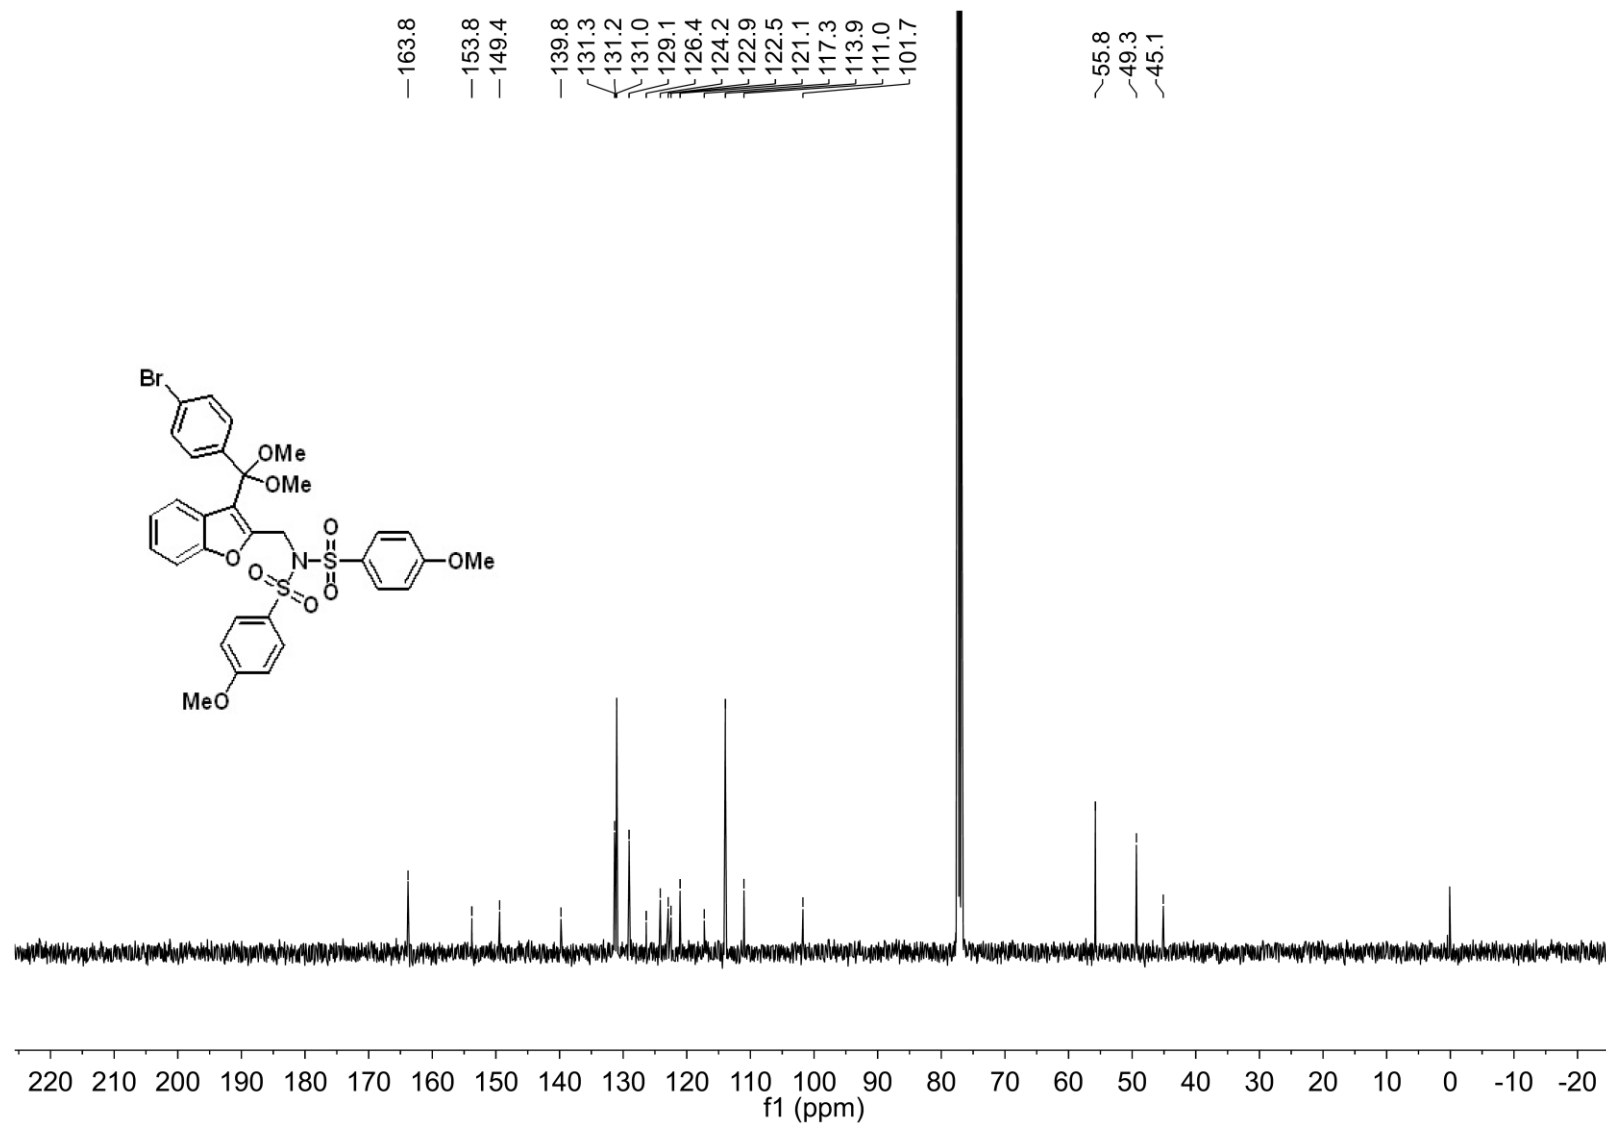

<sup>1</sup>H spectra of compound 3w:

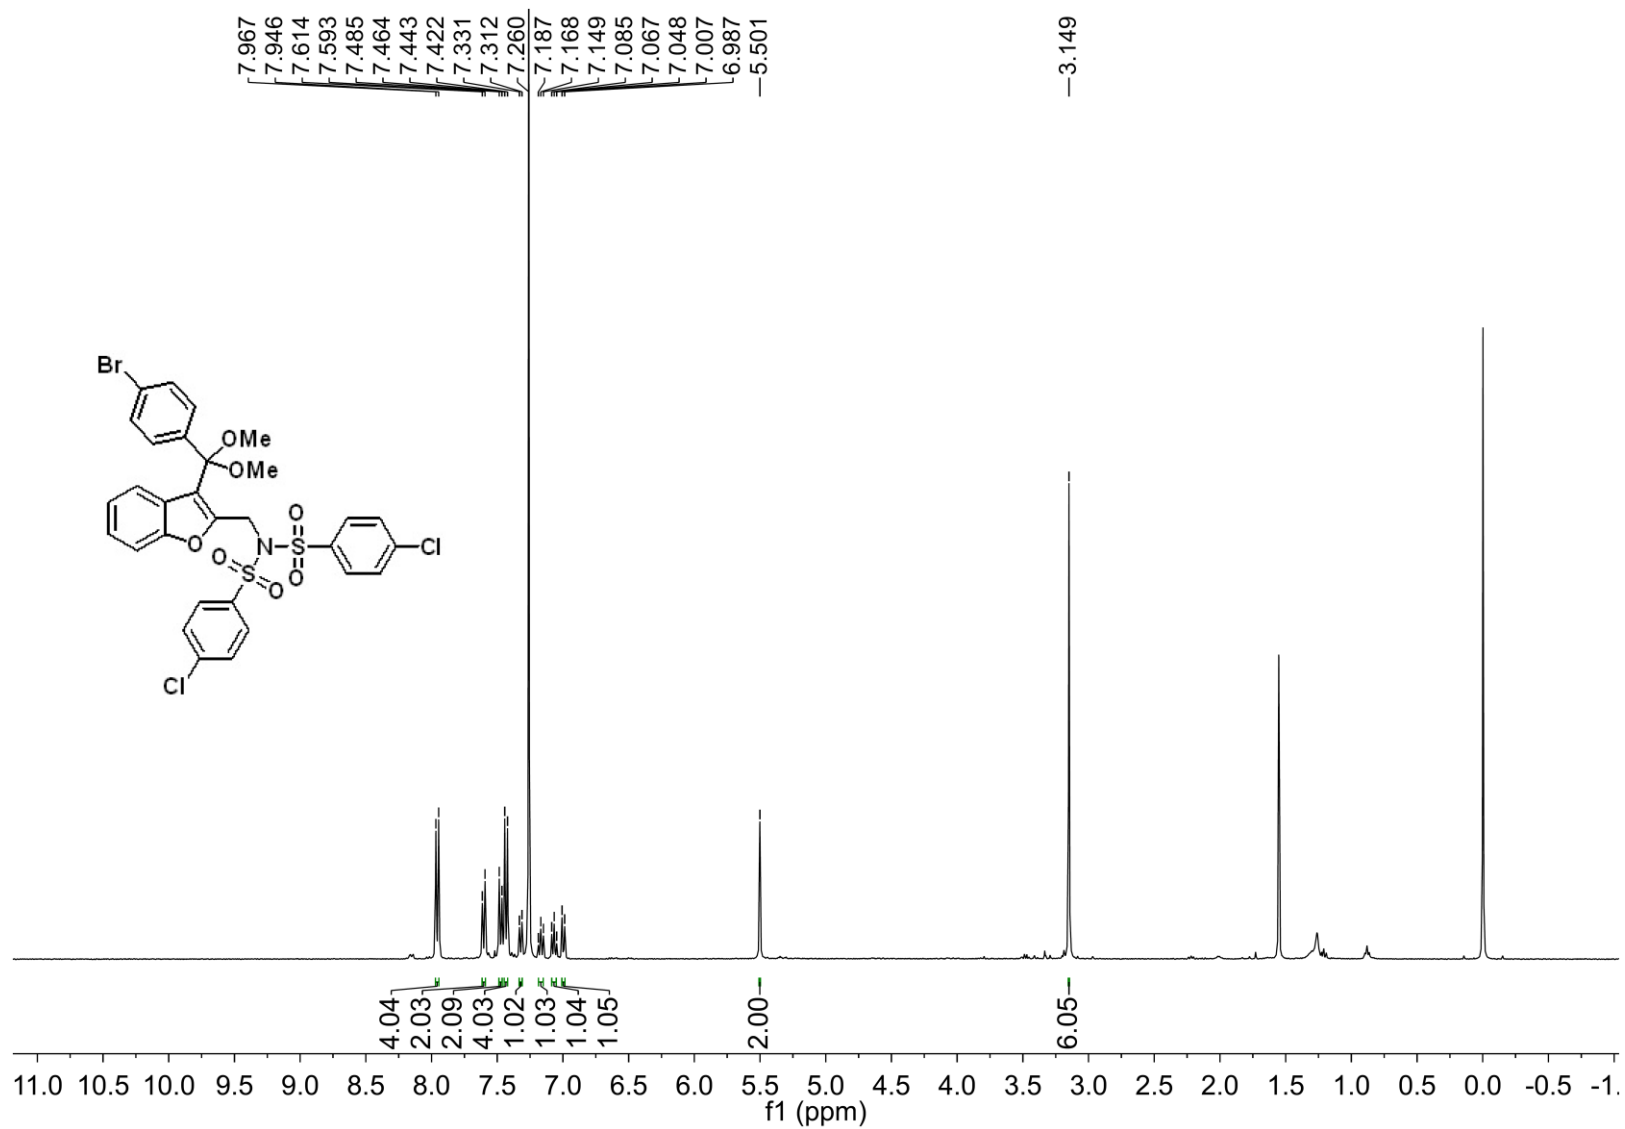

<sup>13</sup>C spectra of compound 3w:

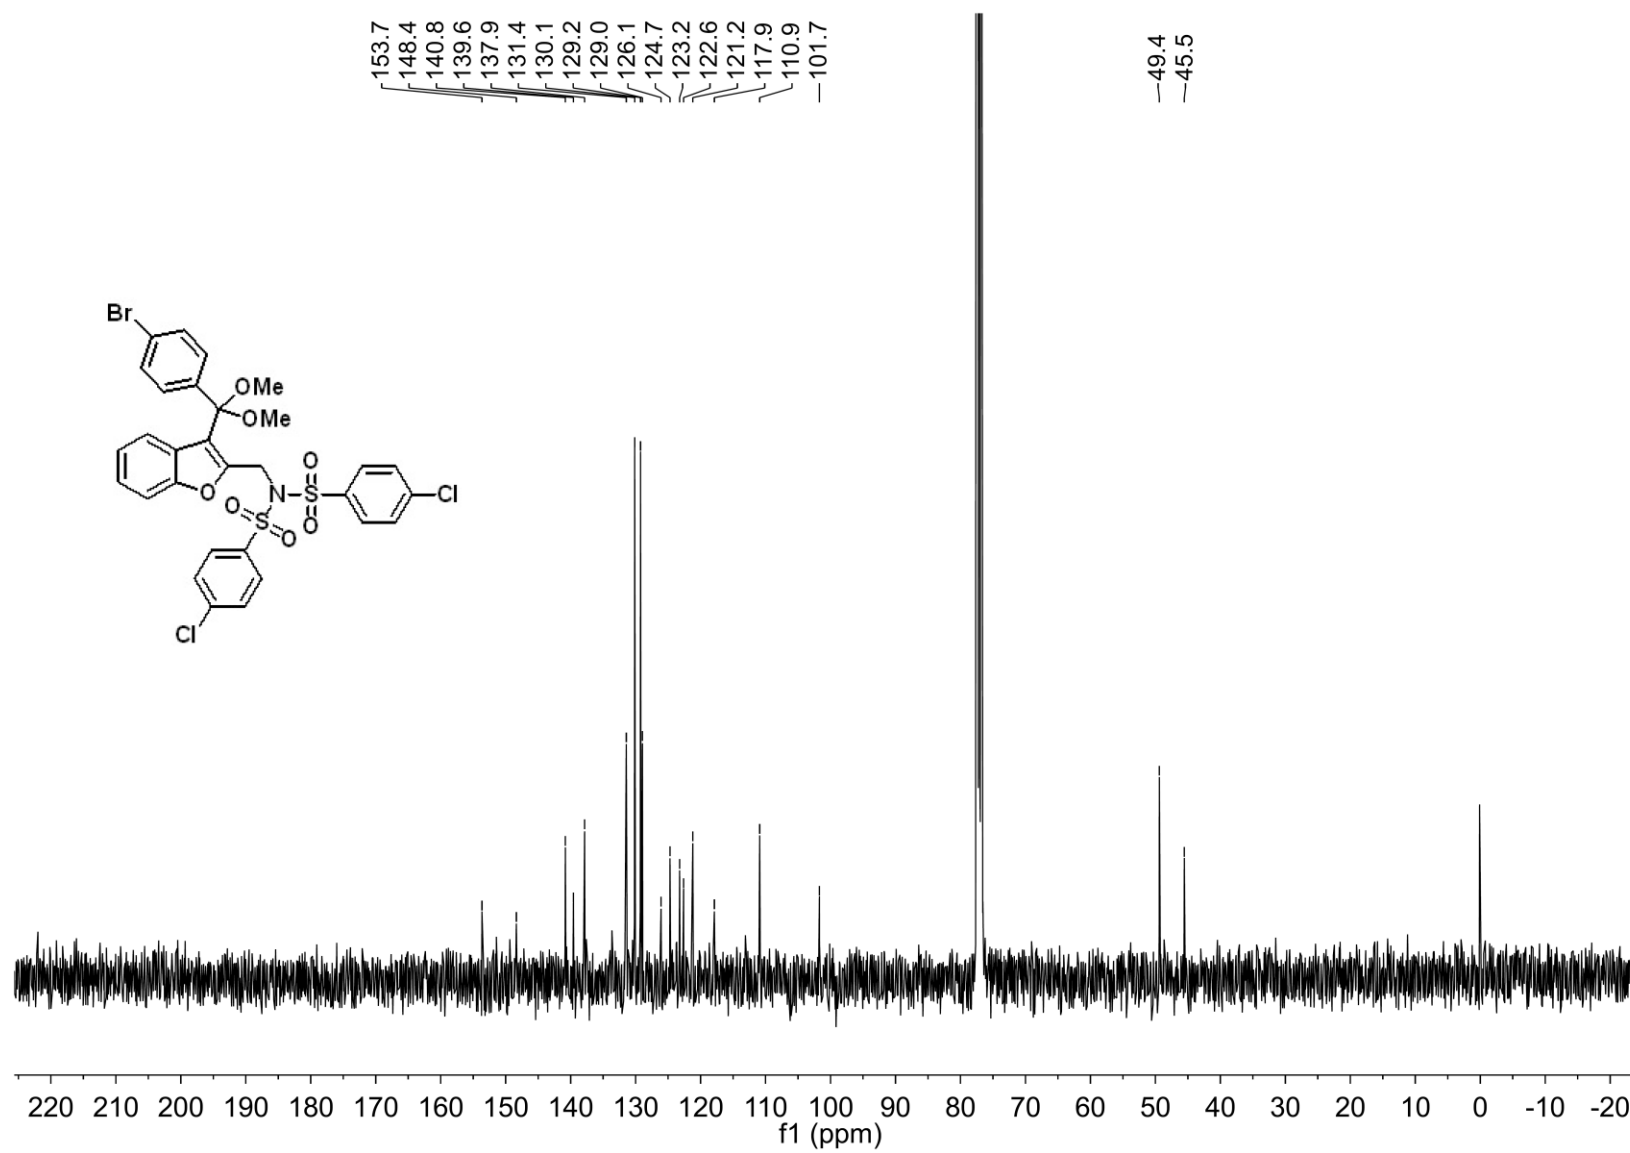

<sup>1</sup>H spectra of compound 3x:

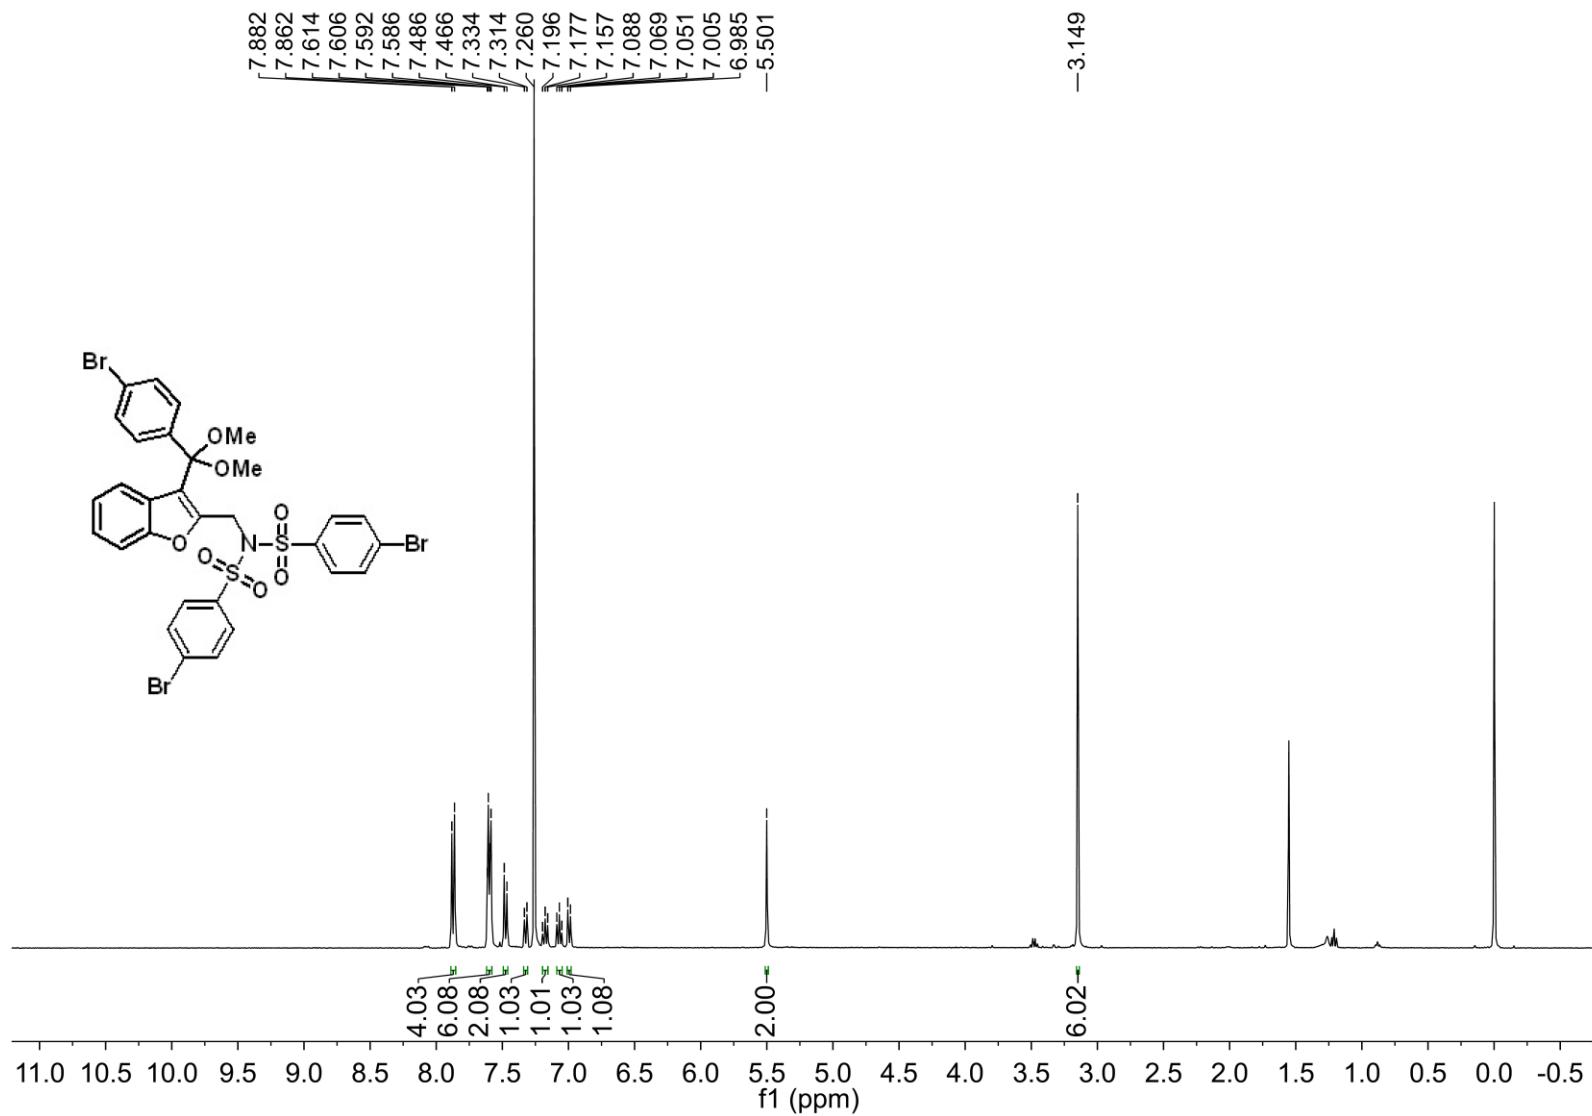

<sup>13</sup>C spectra of compound 3x:

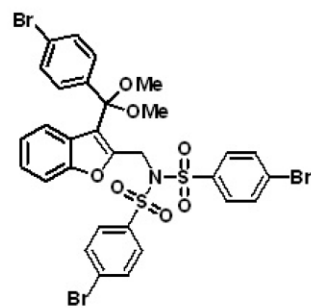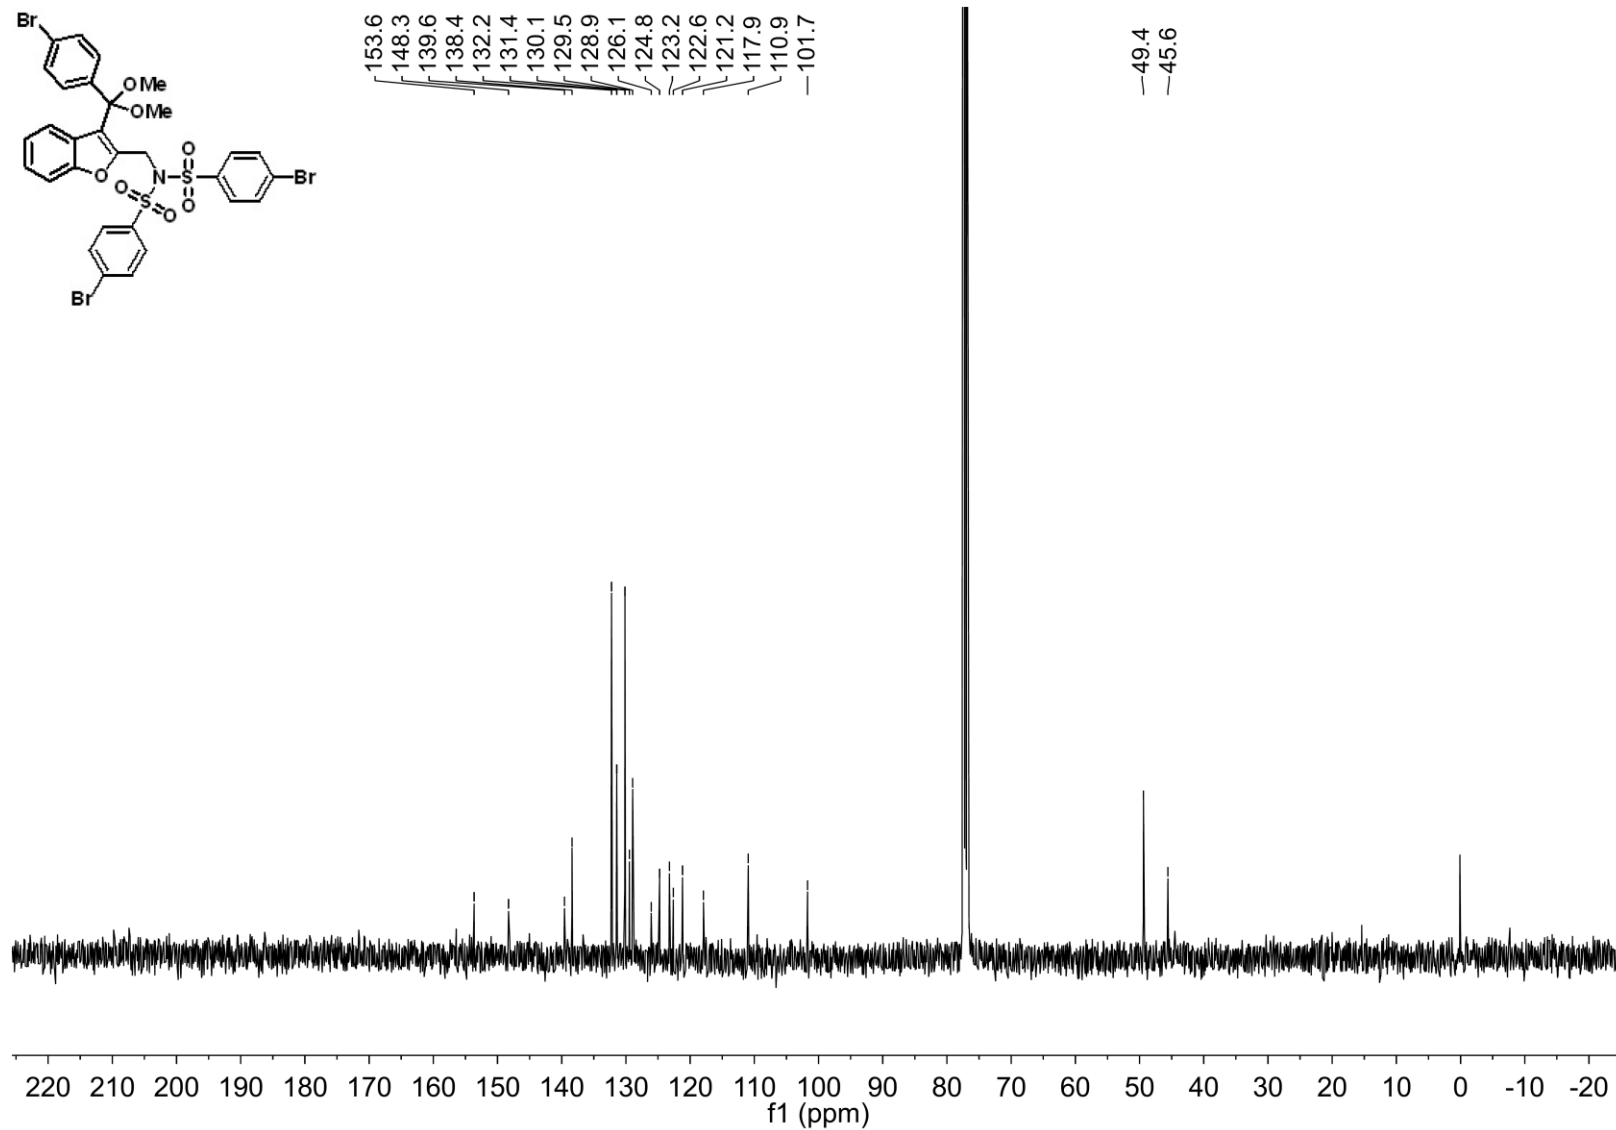



<sup>1</sup>H spectra of compound 3y:

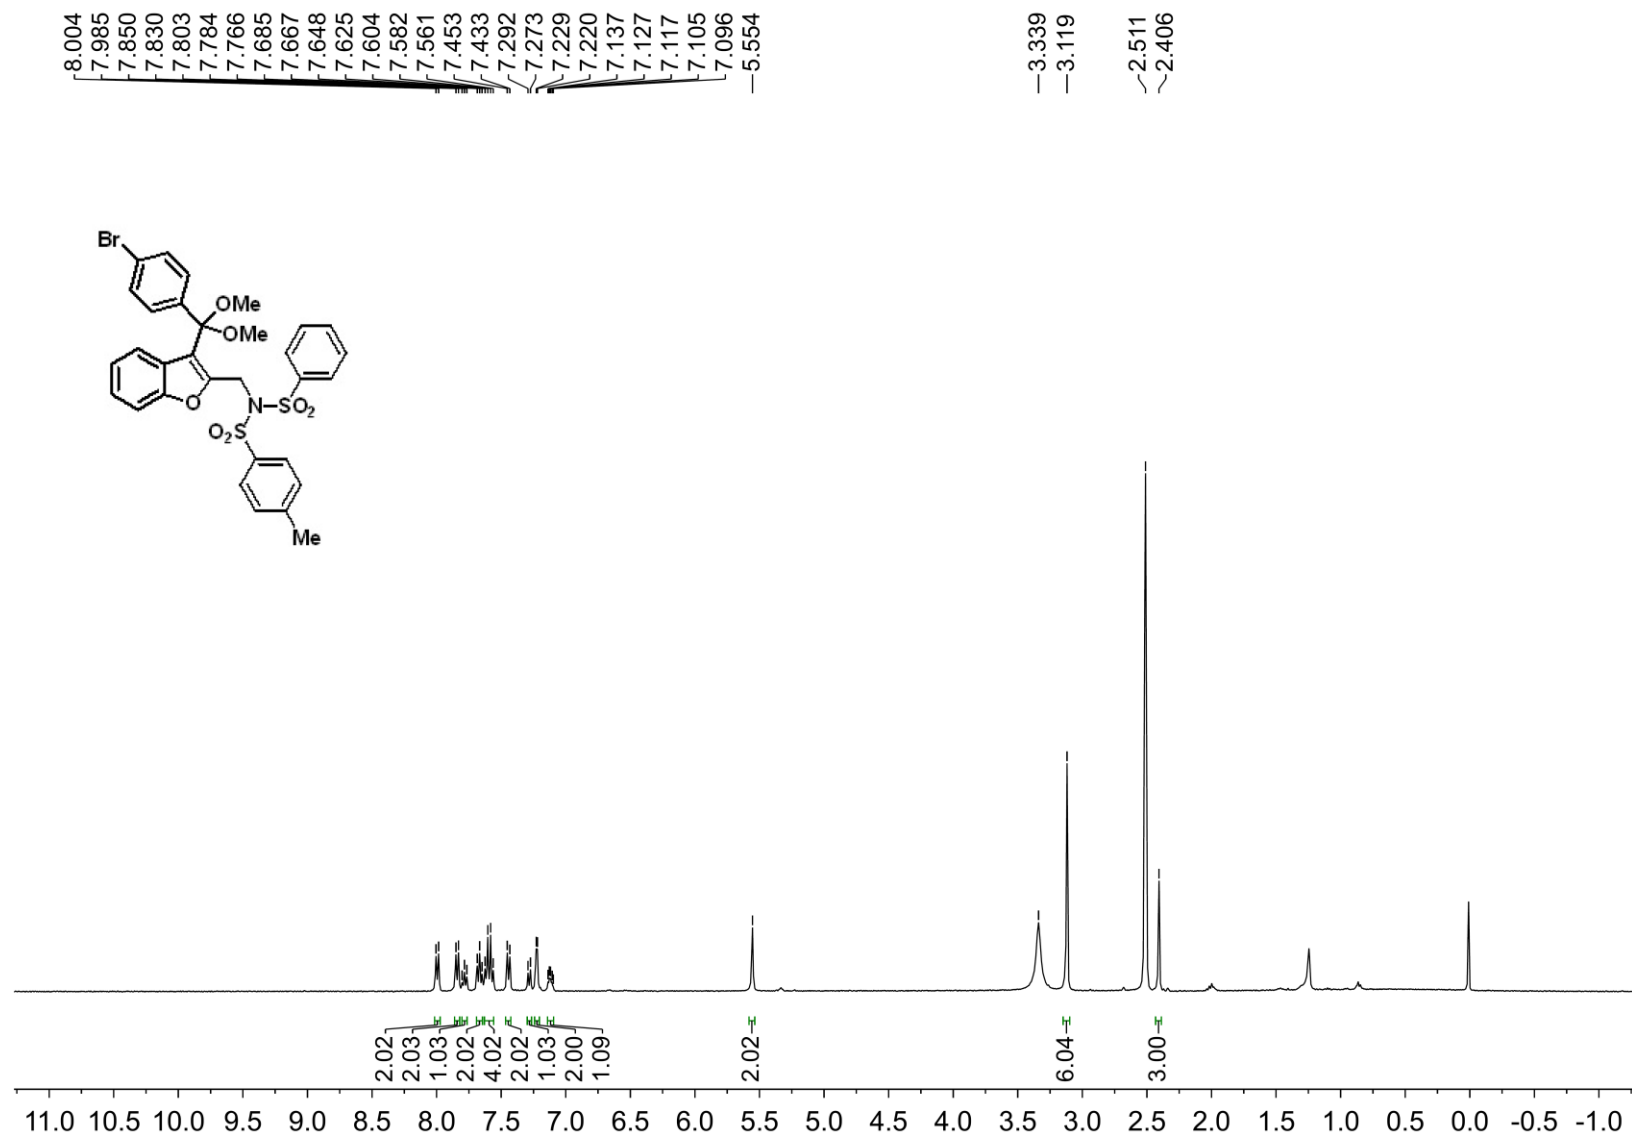

<sup>13</sup>C spectra of compound 3y:

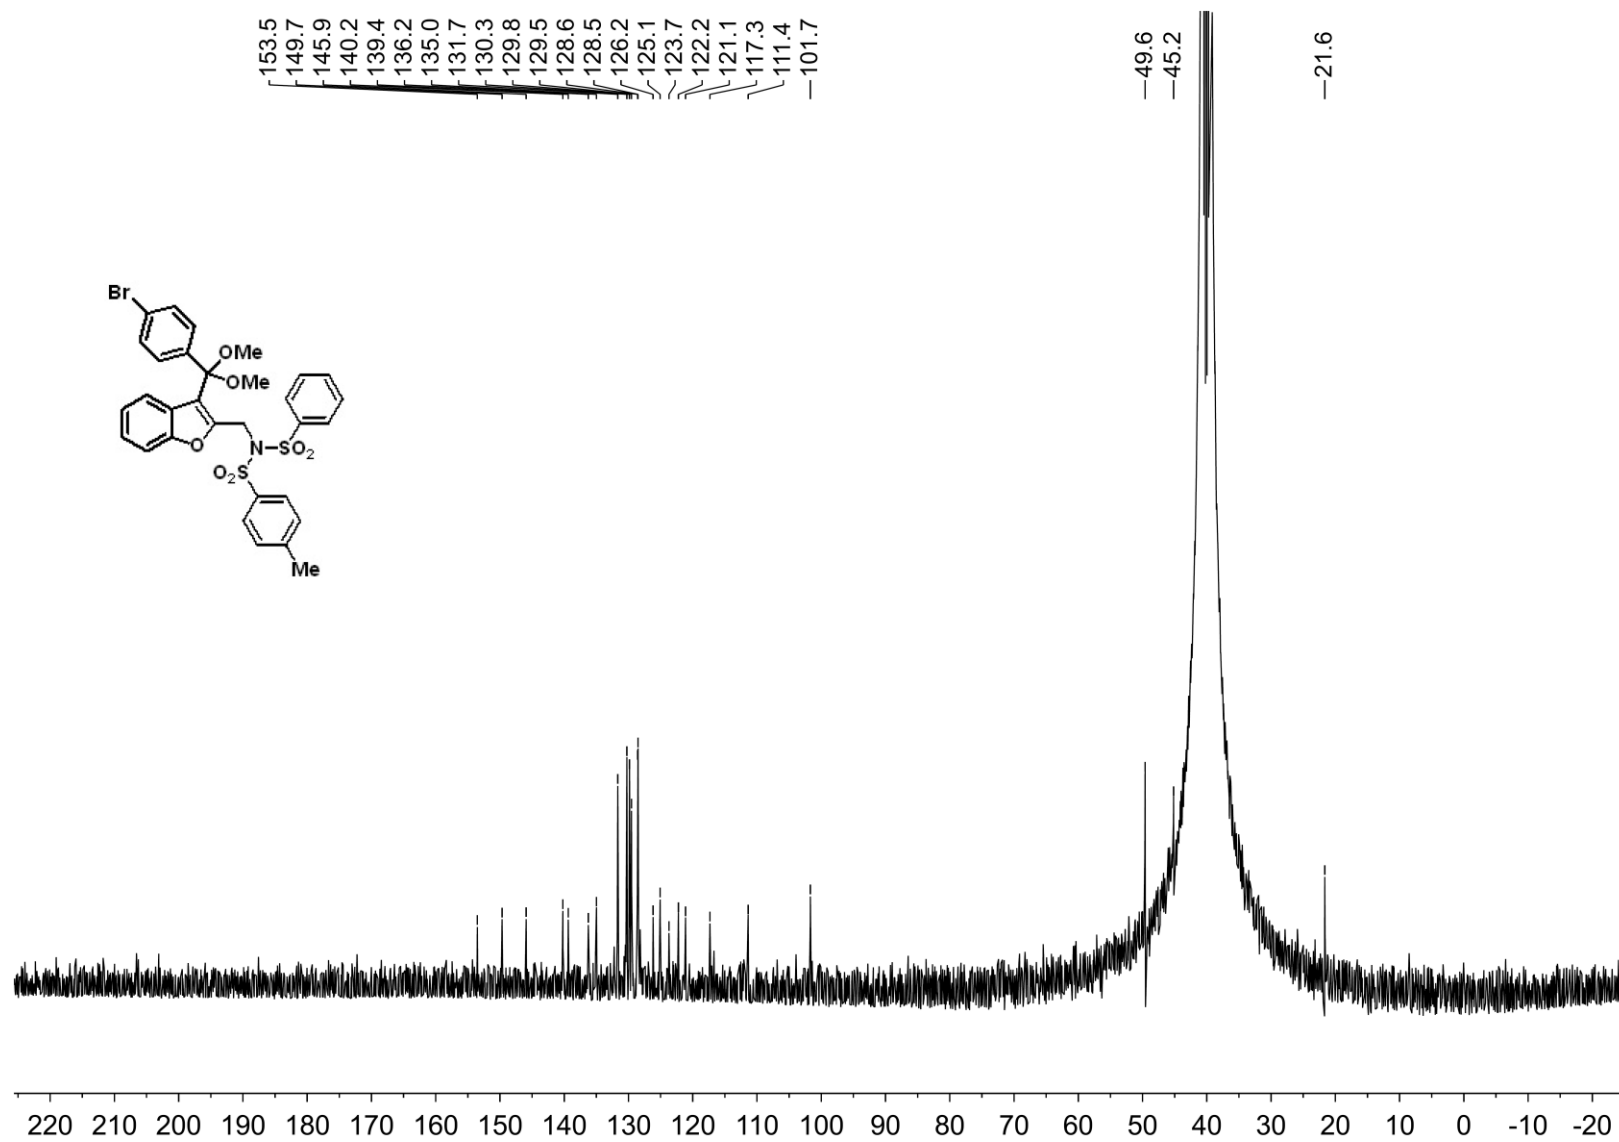

<sup>1</sup>H spectra of compound 3z:

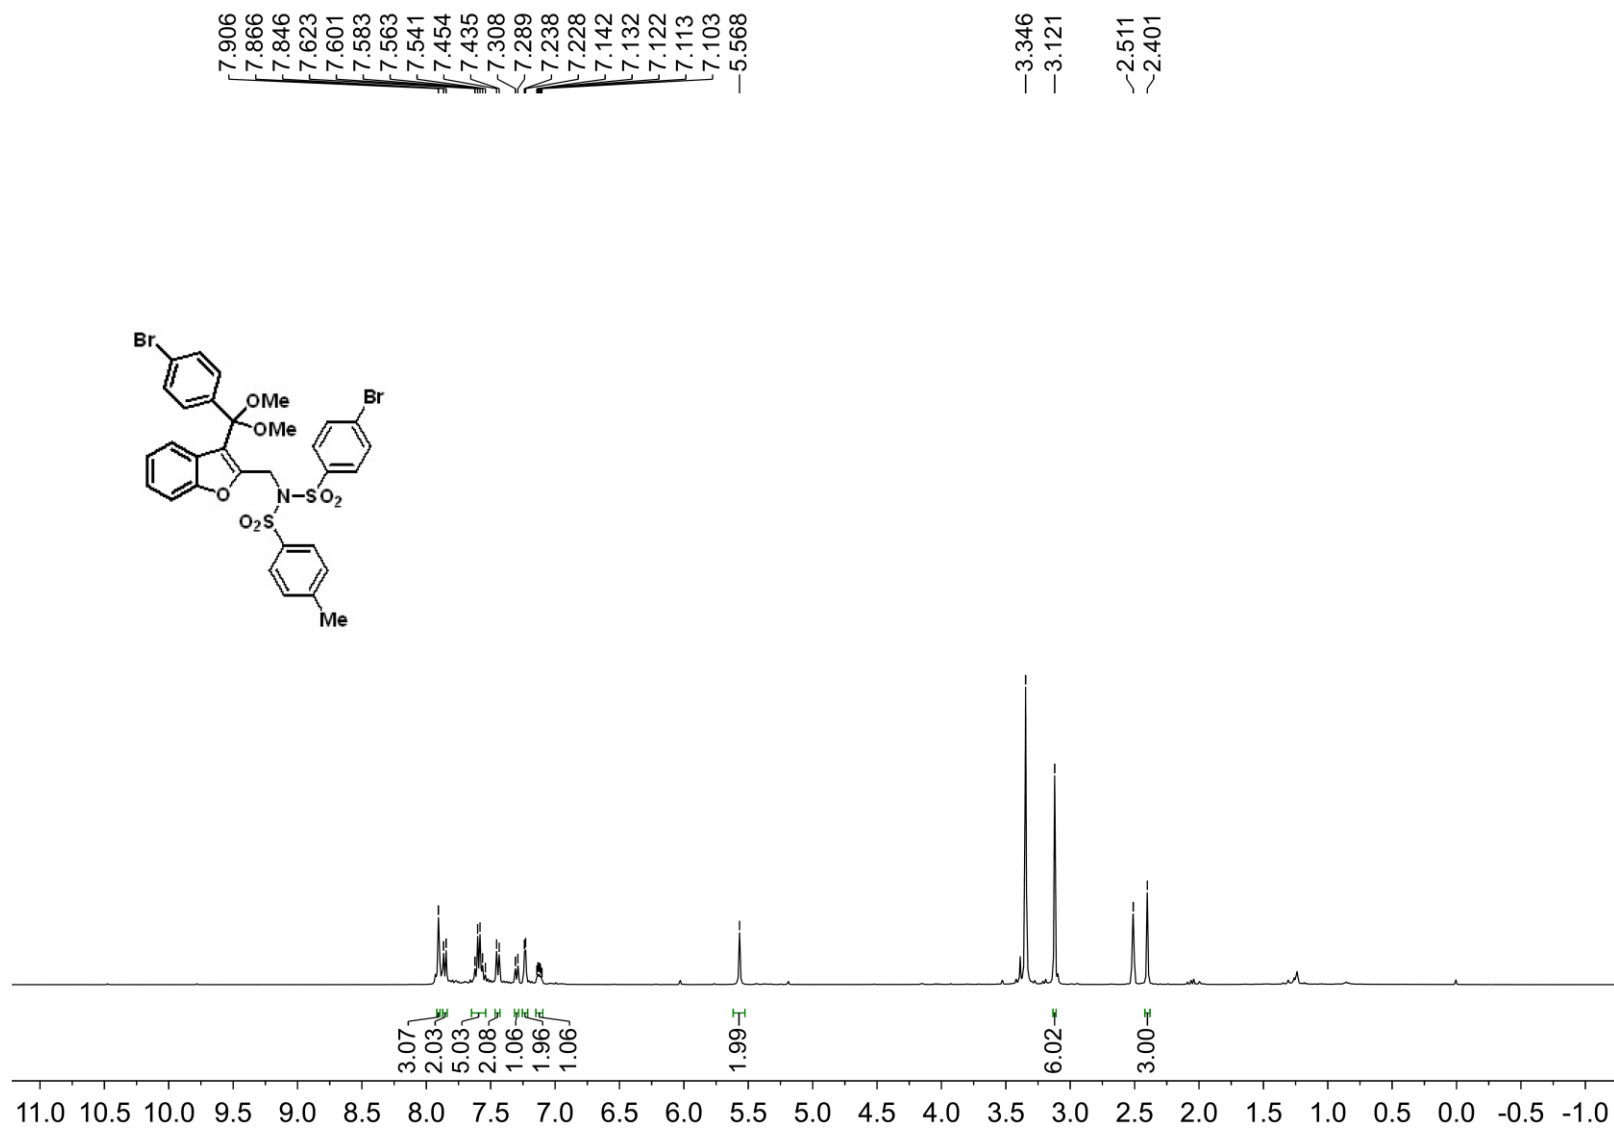

<sup>13</sup>C spectra of compound 3z:

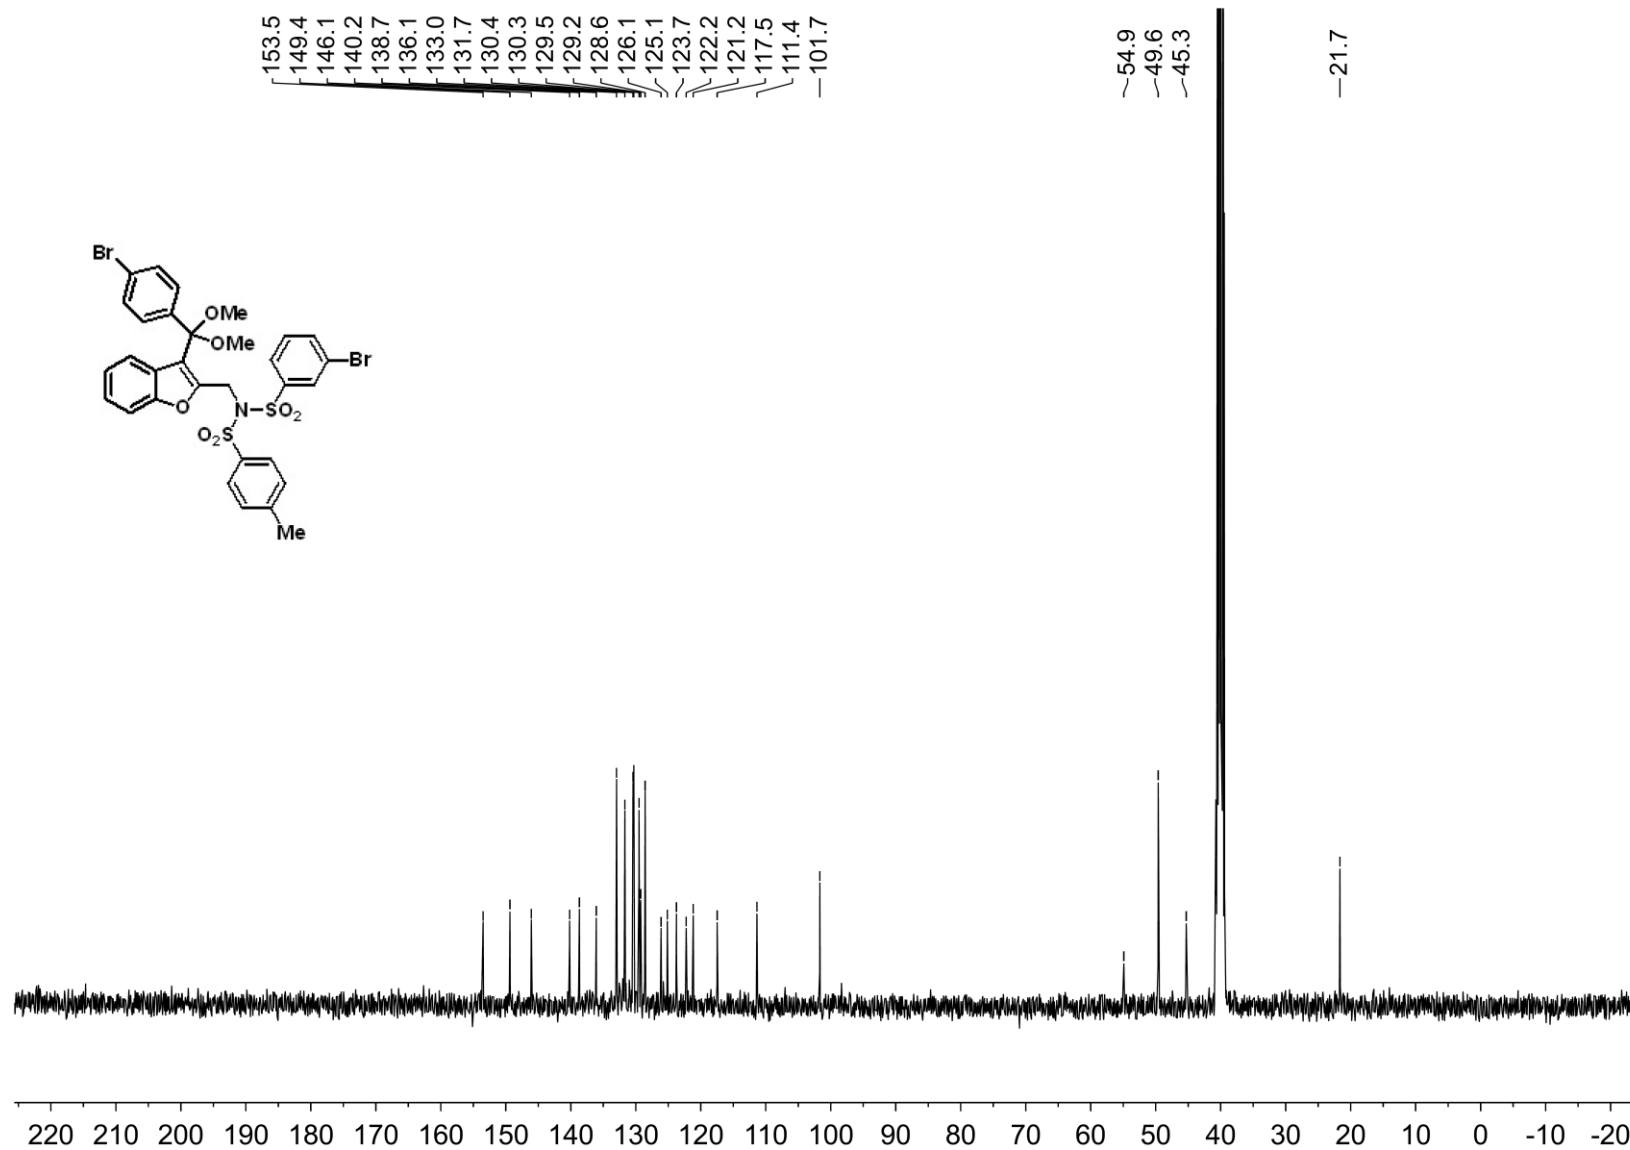

<sup>1</sup>H spectra of compound 3aa:

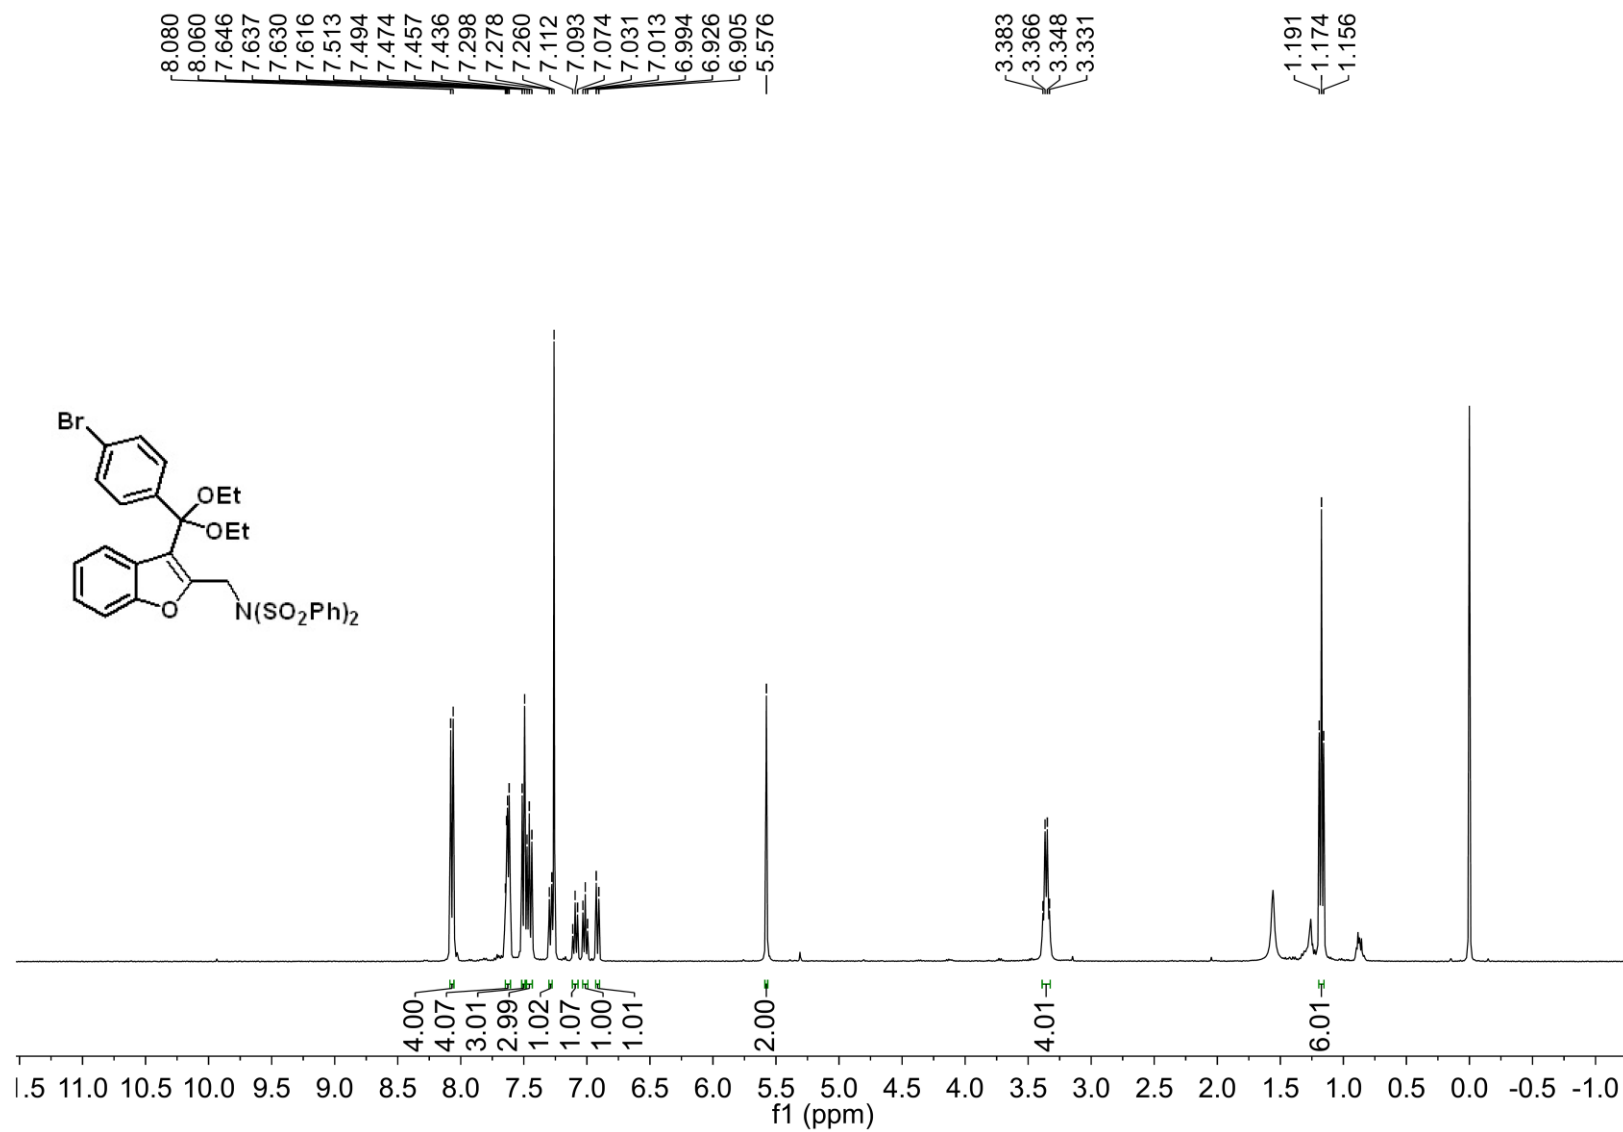

<sup>13</sup>C spectra of compound 3aa:

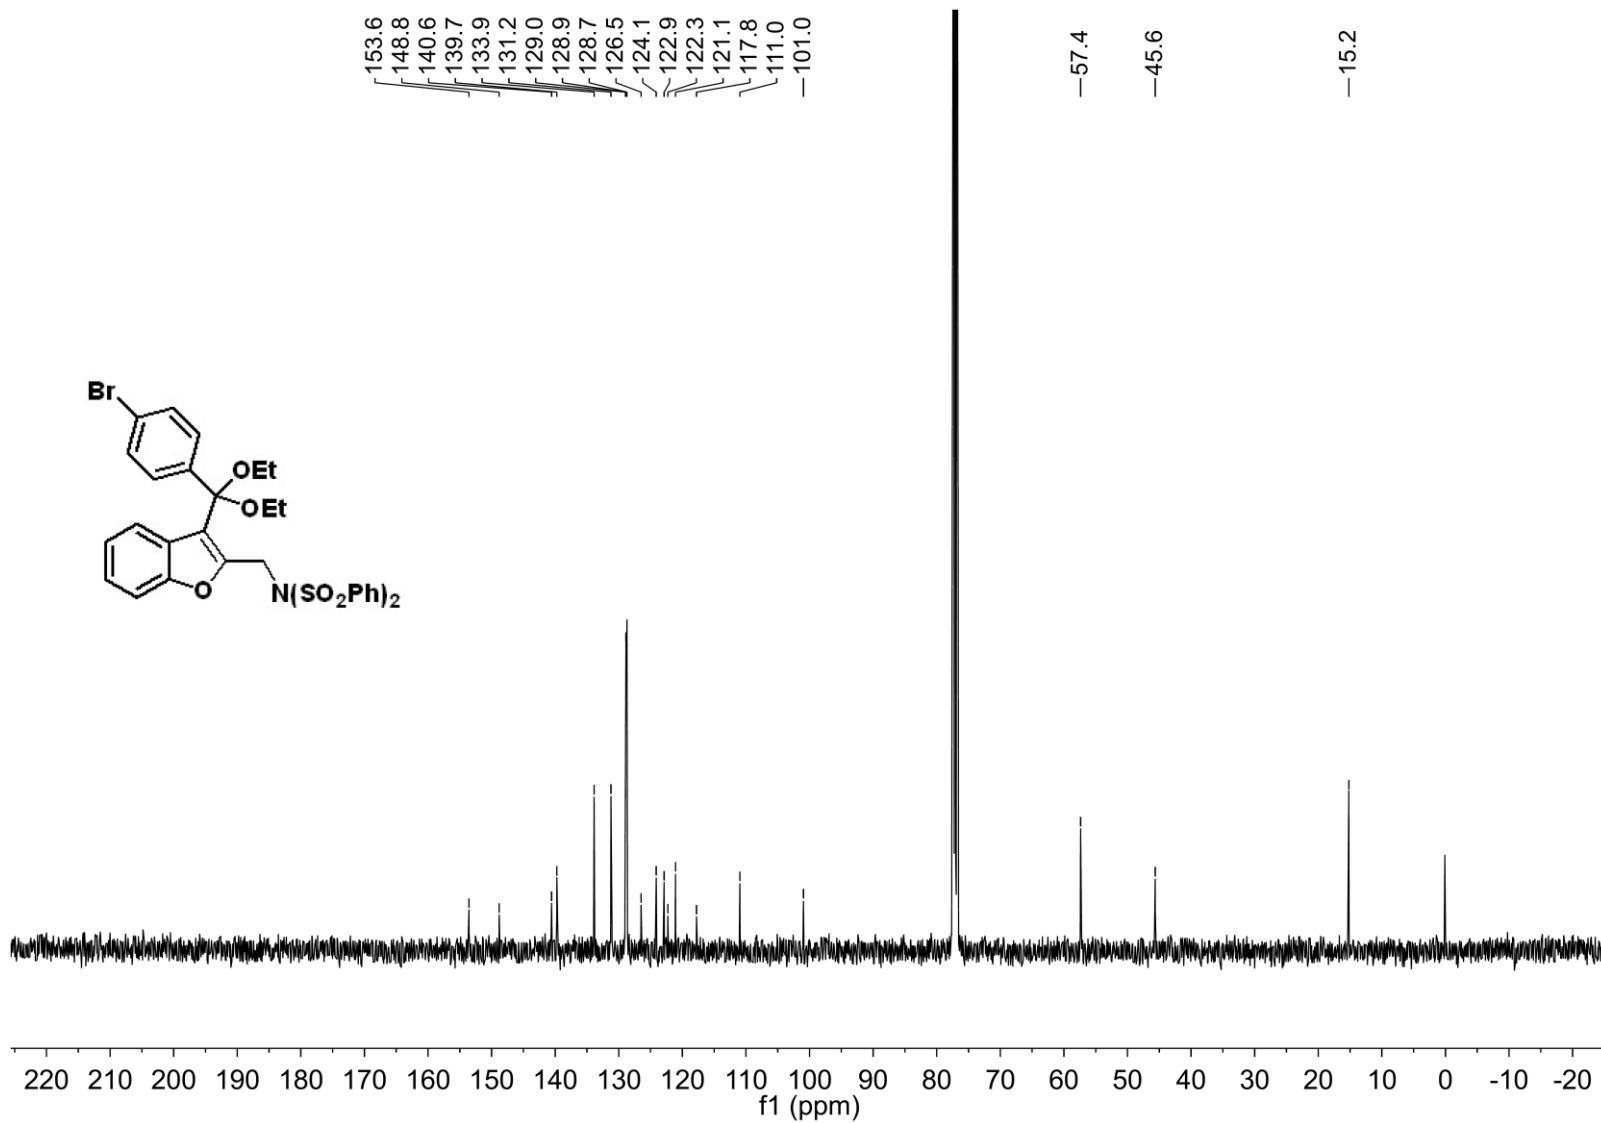

<sup>1</sup>H spectra of compound 3ab:

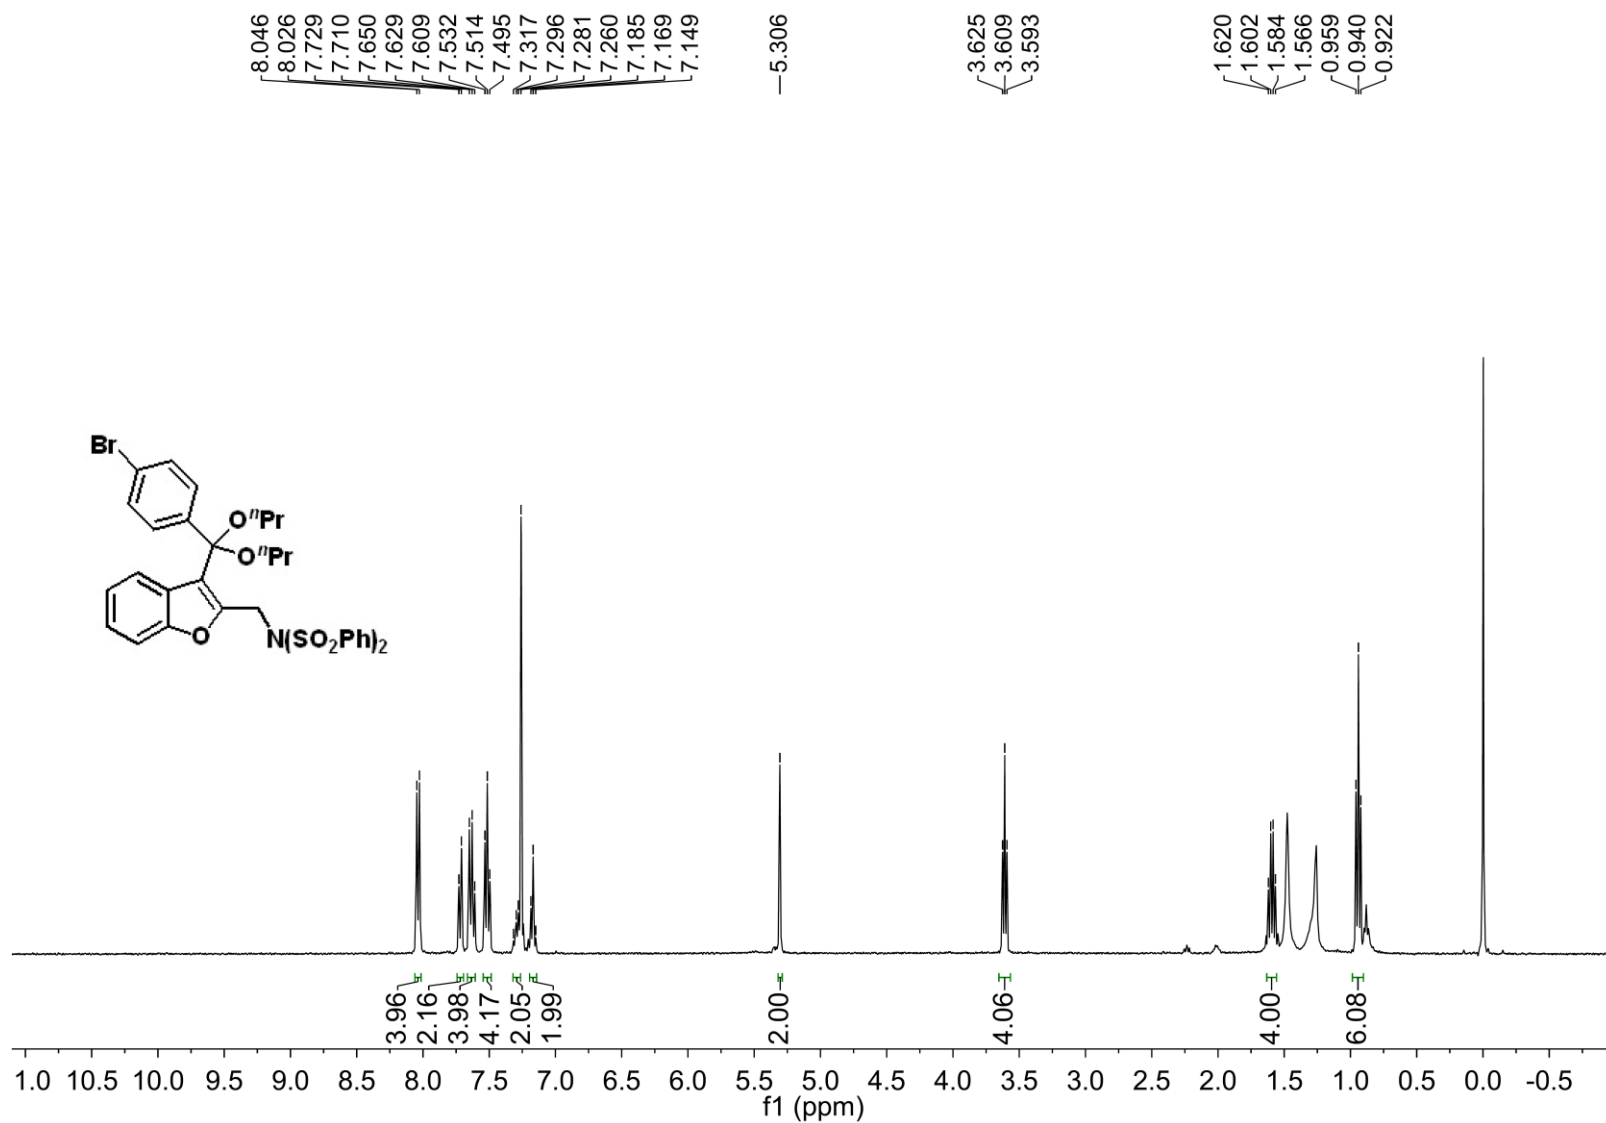

<sup>13</sup>C spectra of compound 3ab:

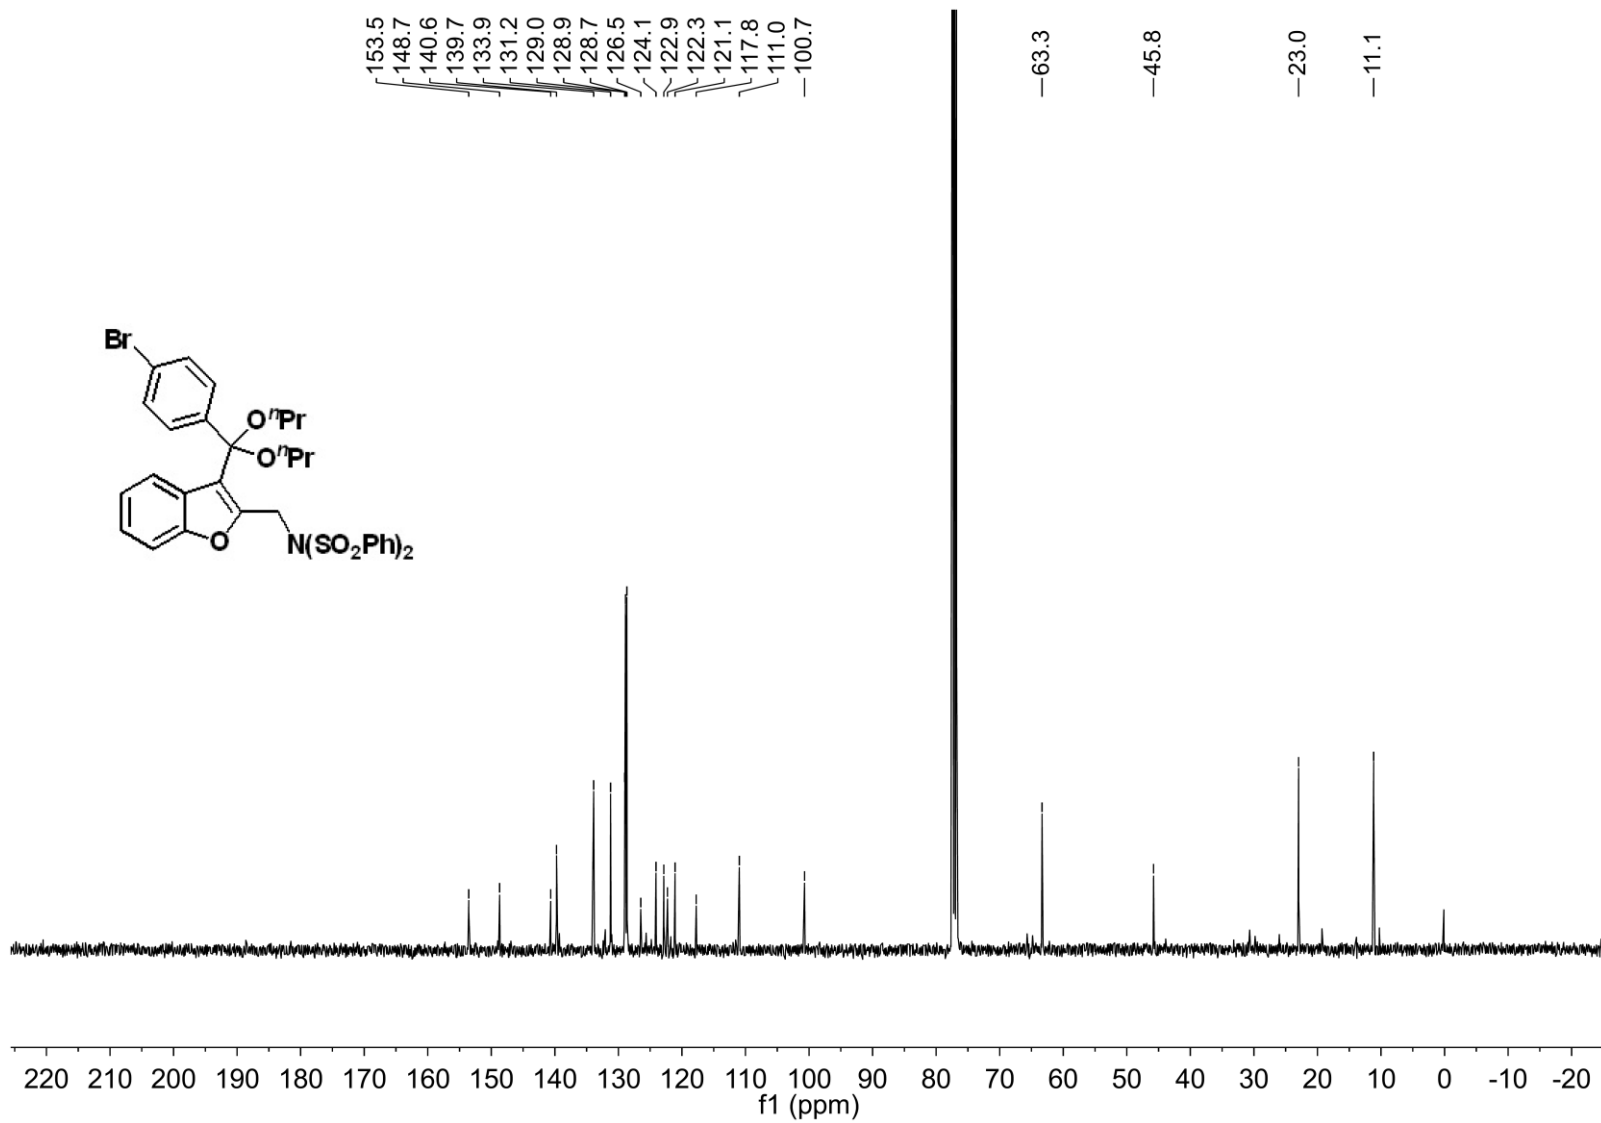



<sup>1</sup>H spectra of compound 4a:

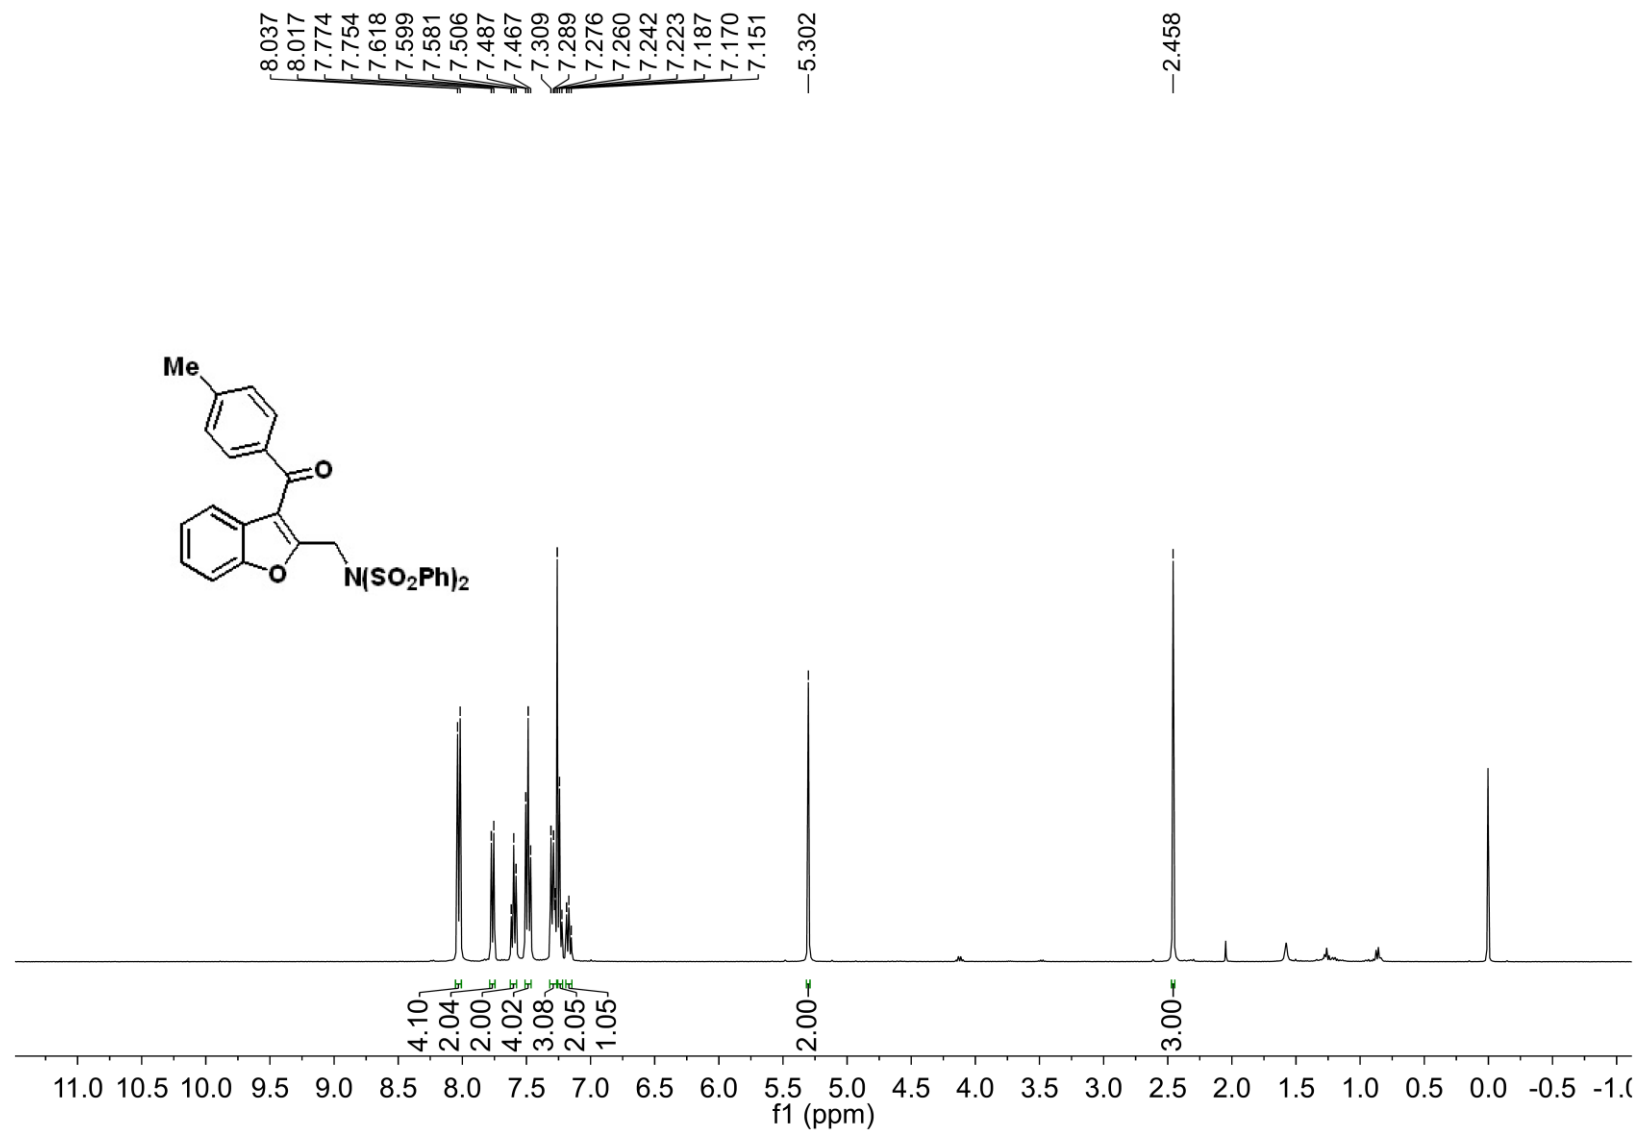

<sup>13</sup>C spectra of compound 4a:

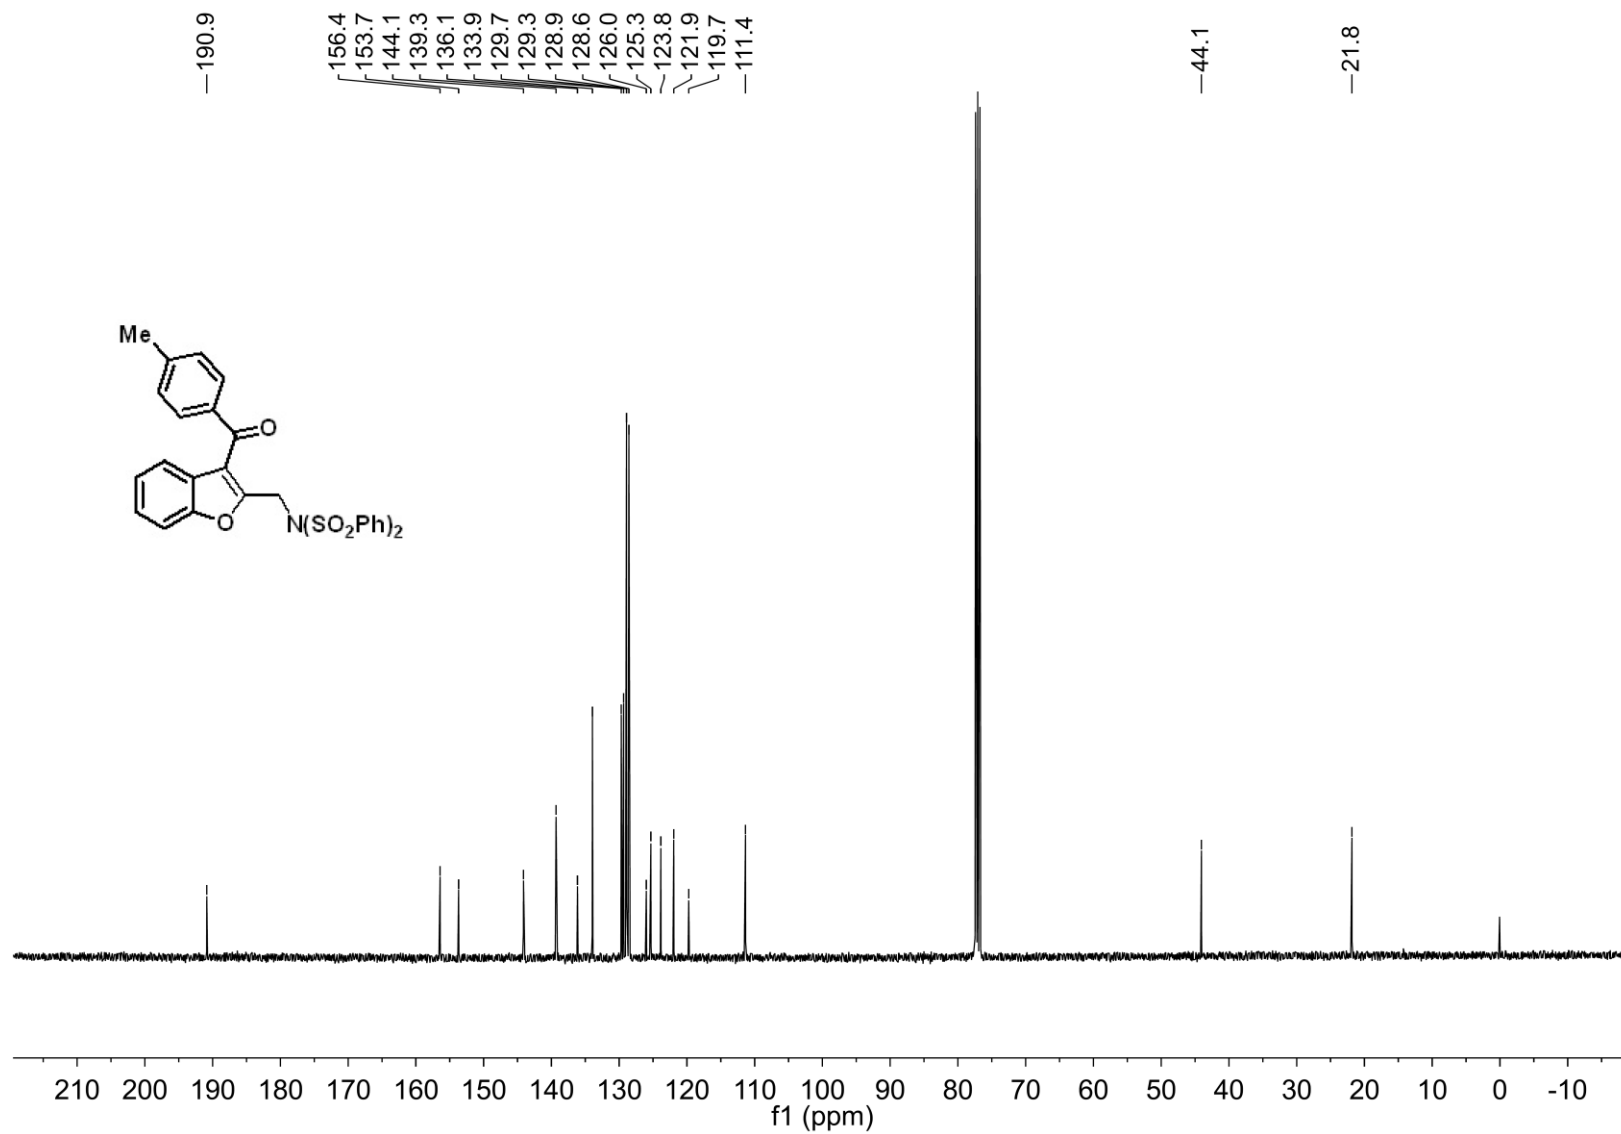

<sup>1</sup>H spectra of compound 4b:

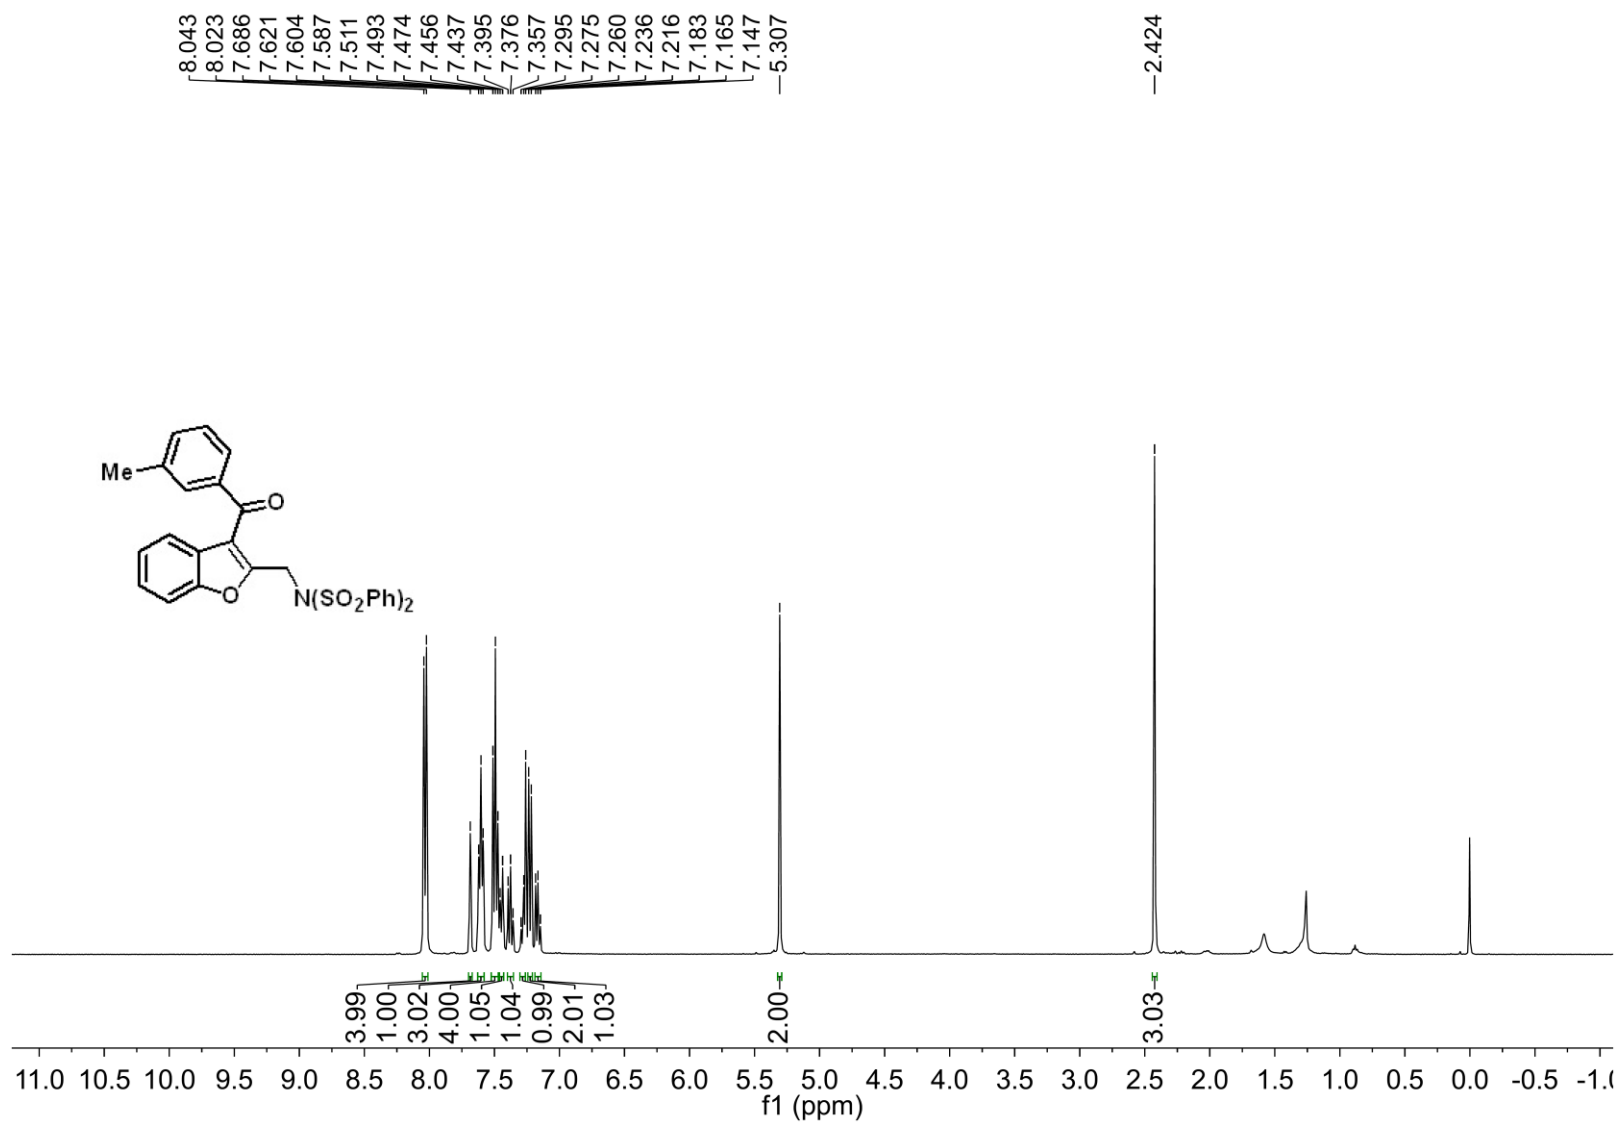

<sup>13</sup>C spectra of compound 4b:

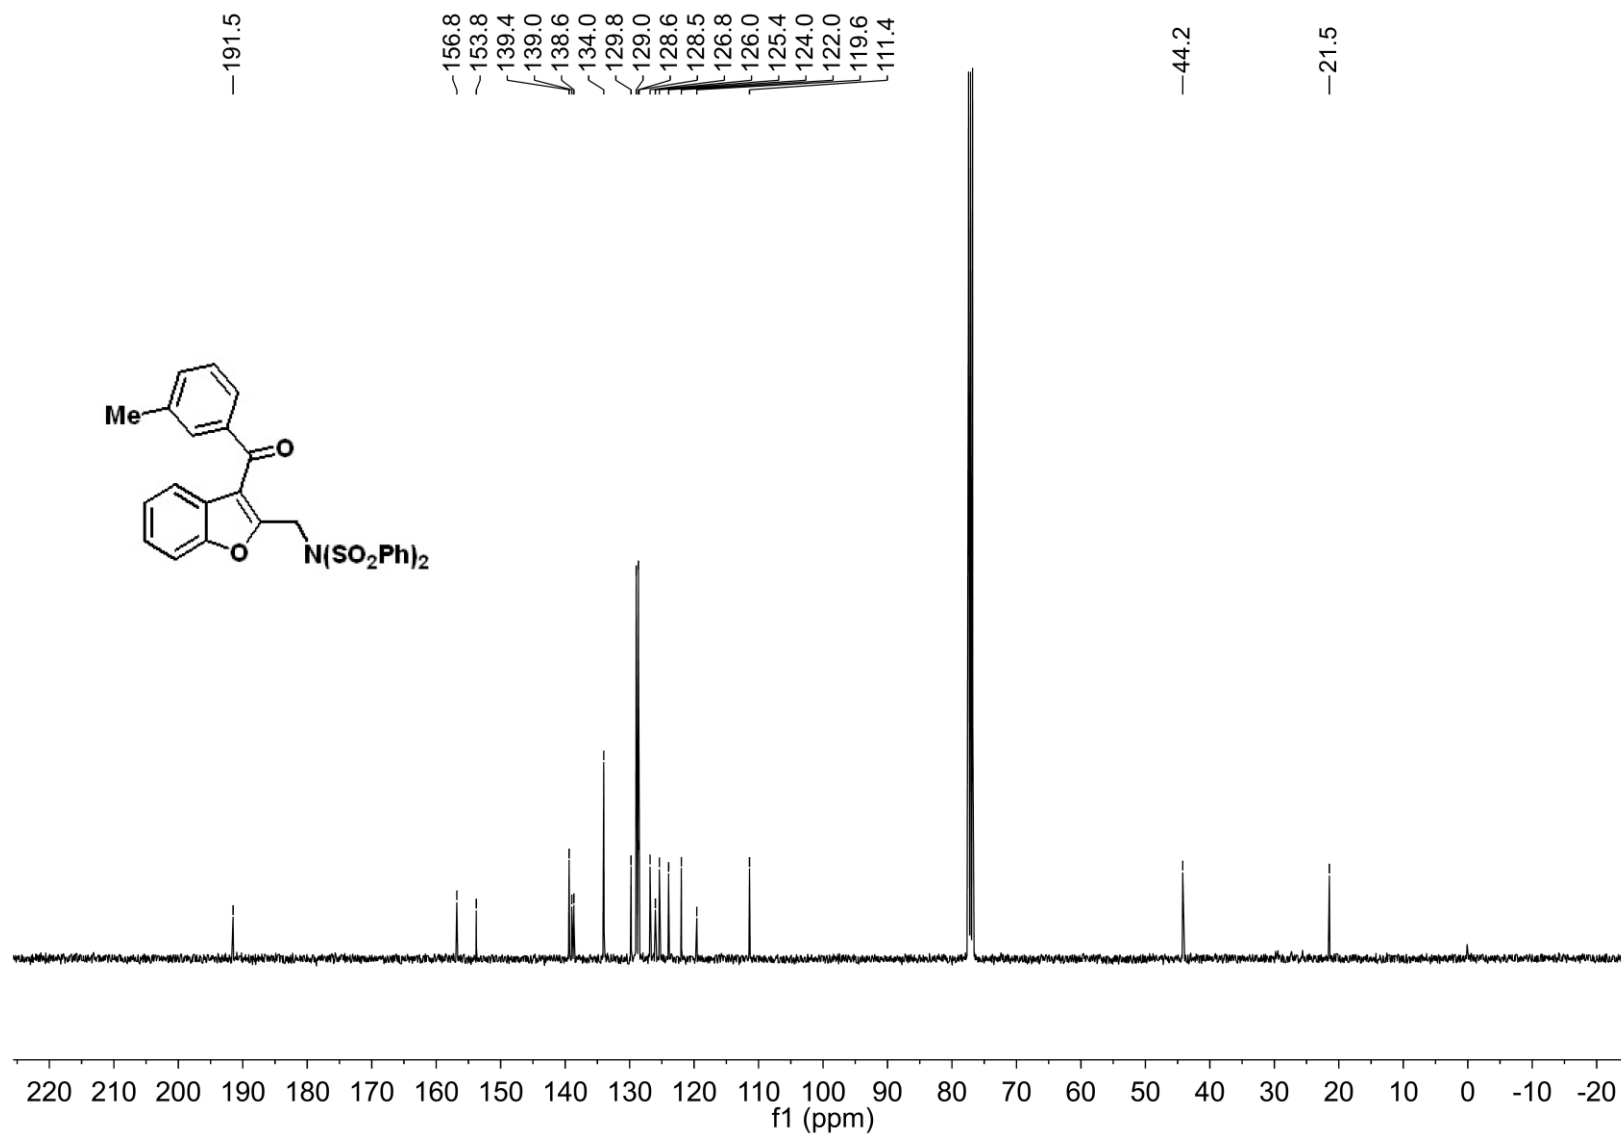

<sup>1</sup>H spectra of compound 4c:

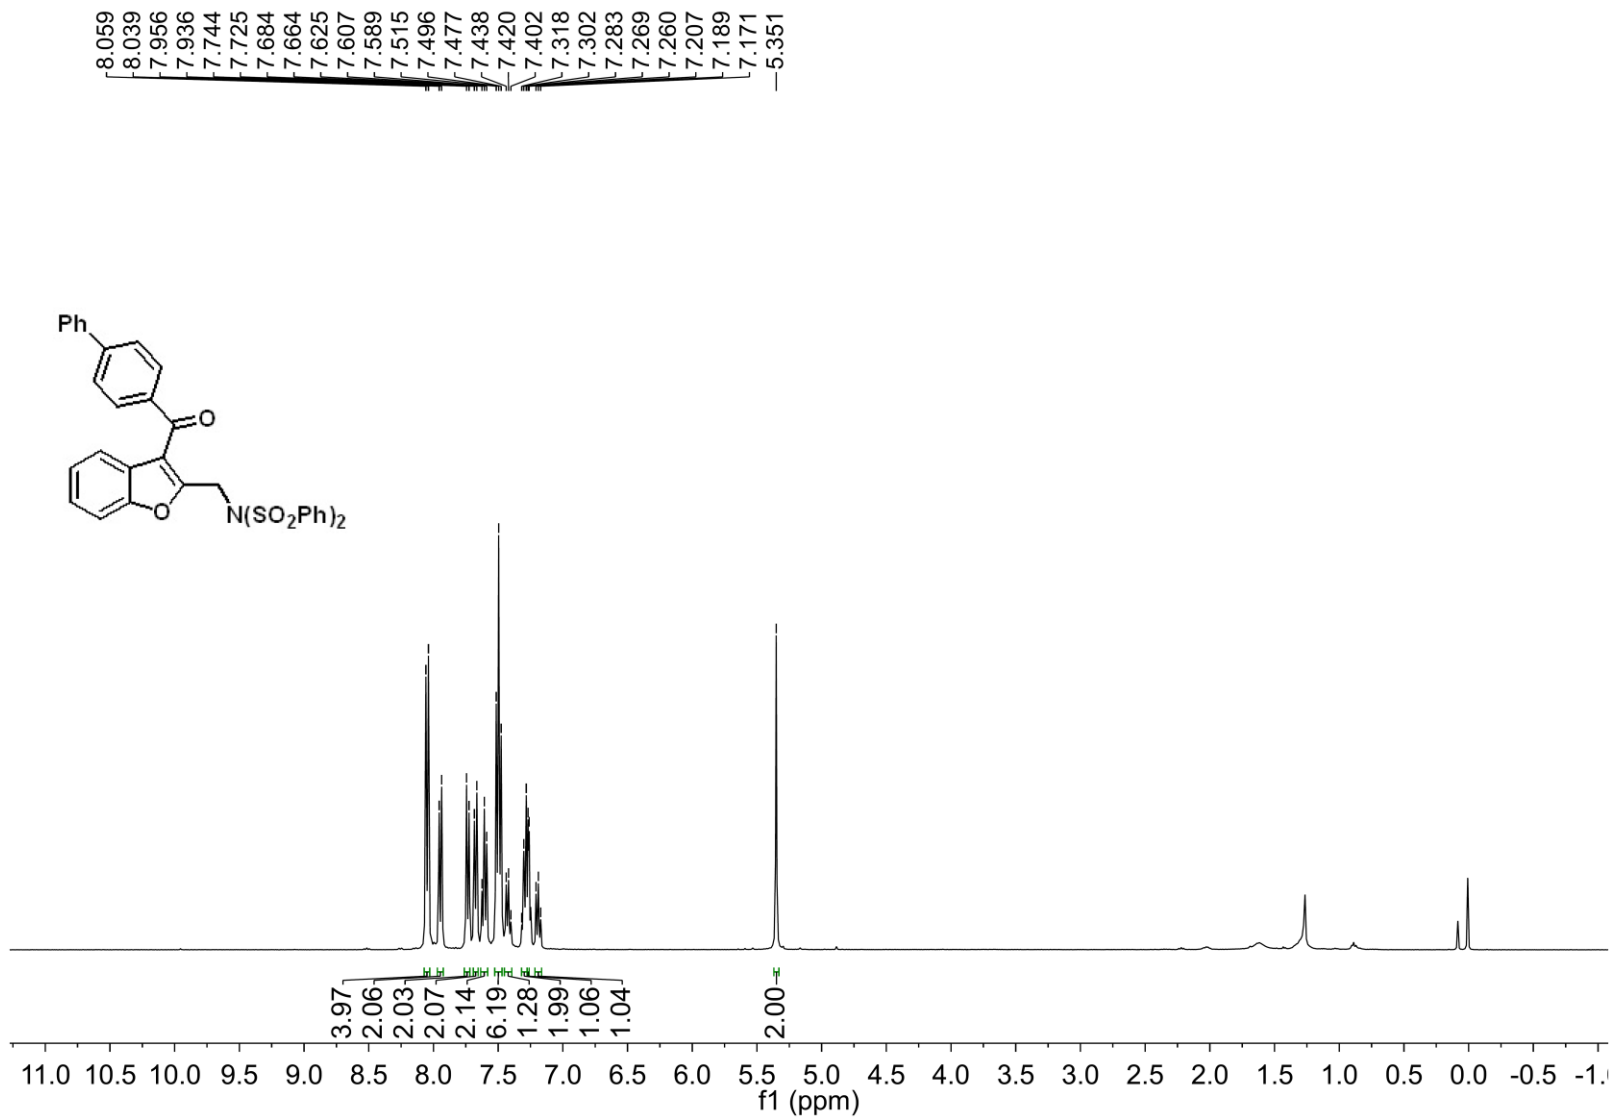

<sup>13</sup>C spectra of compound 4c:

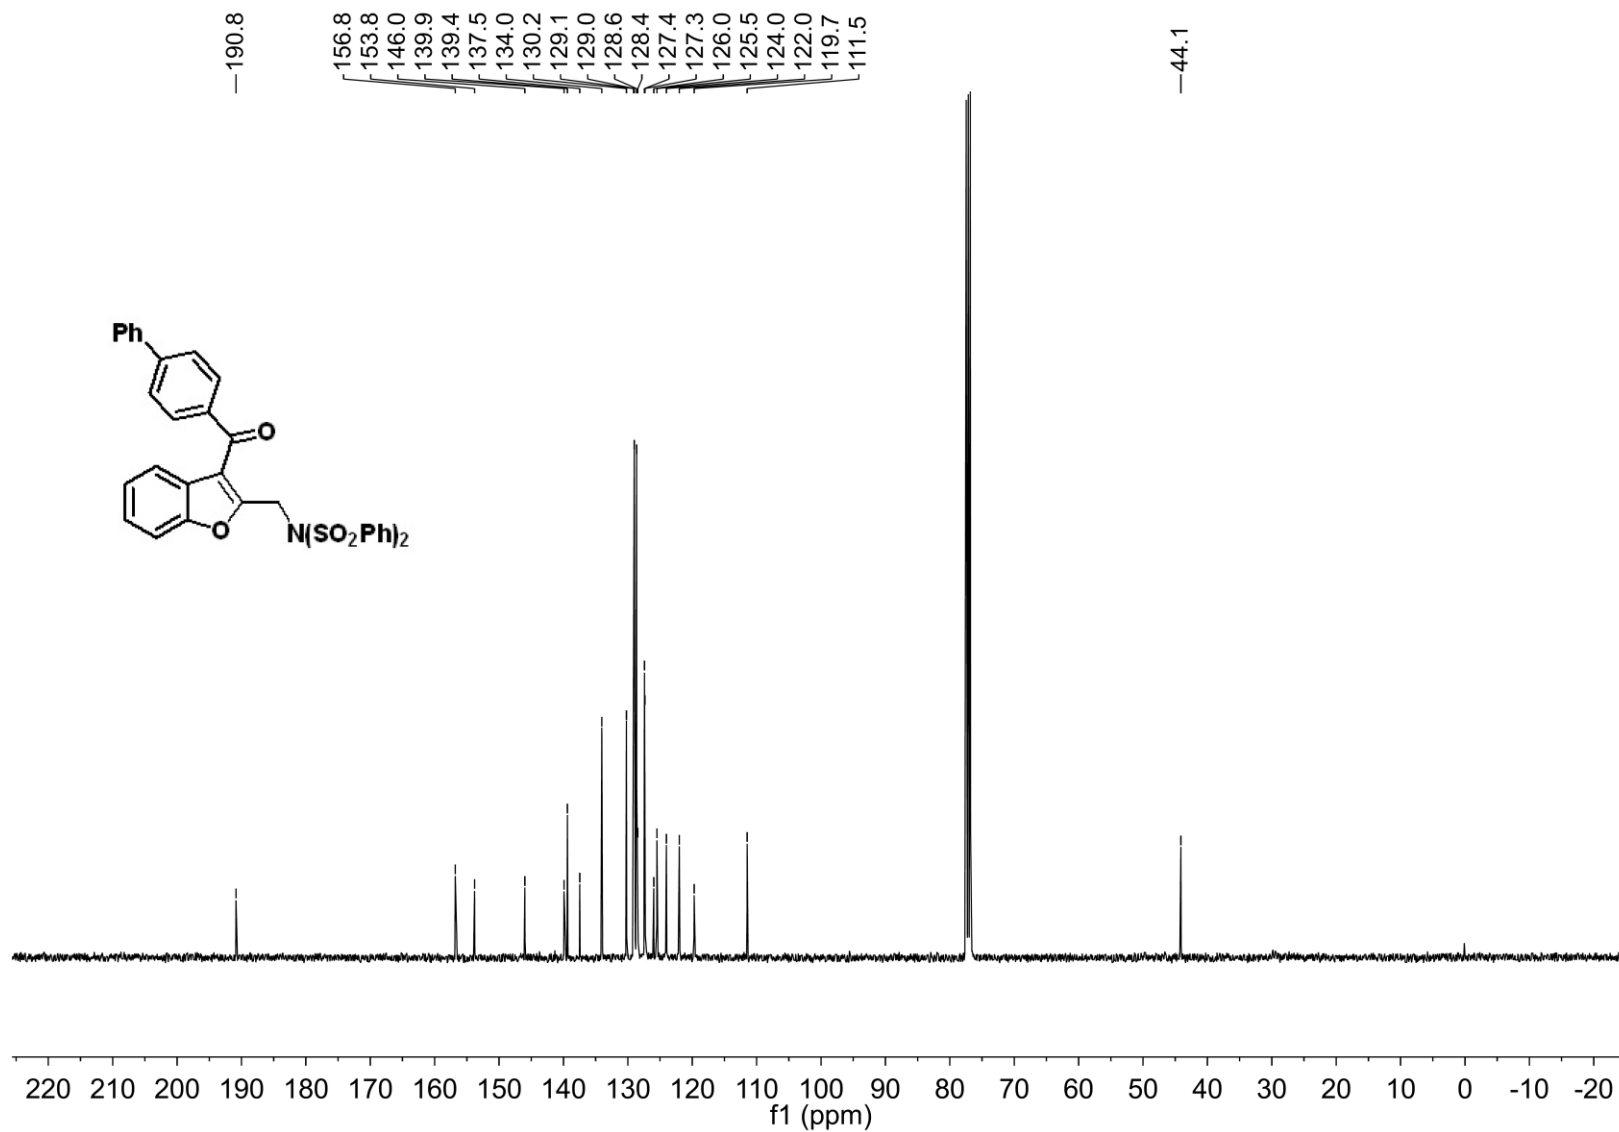

<sup>1</sup>H spectra of compound 4d:

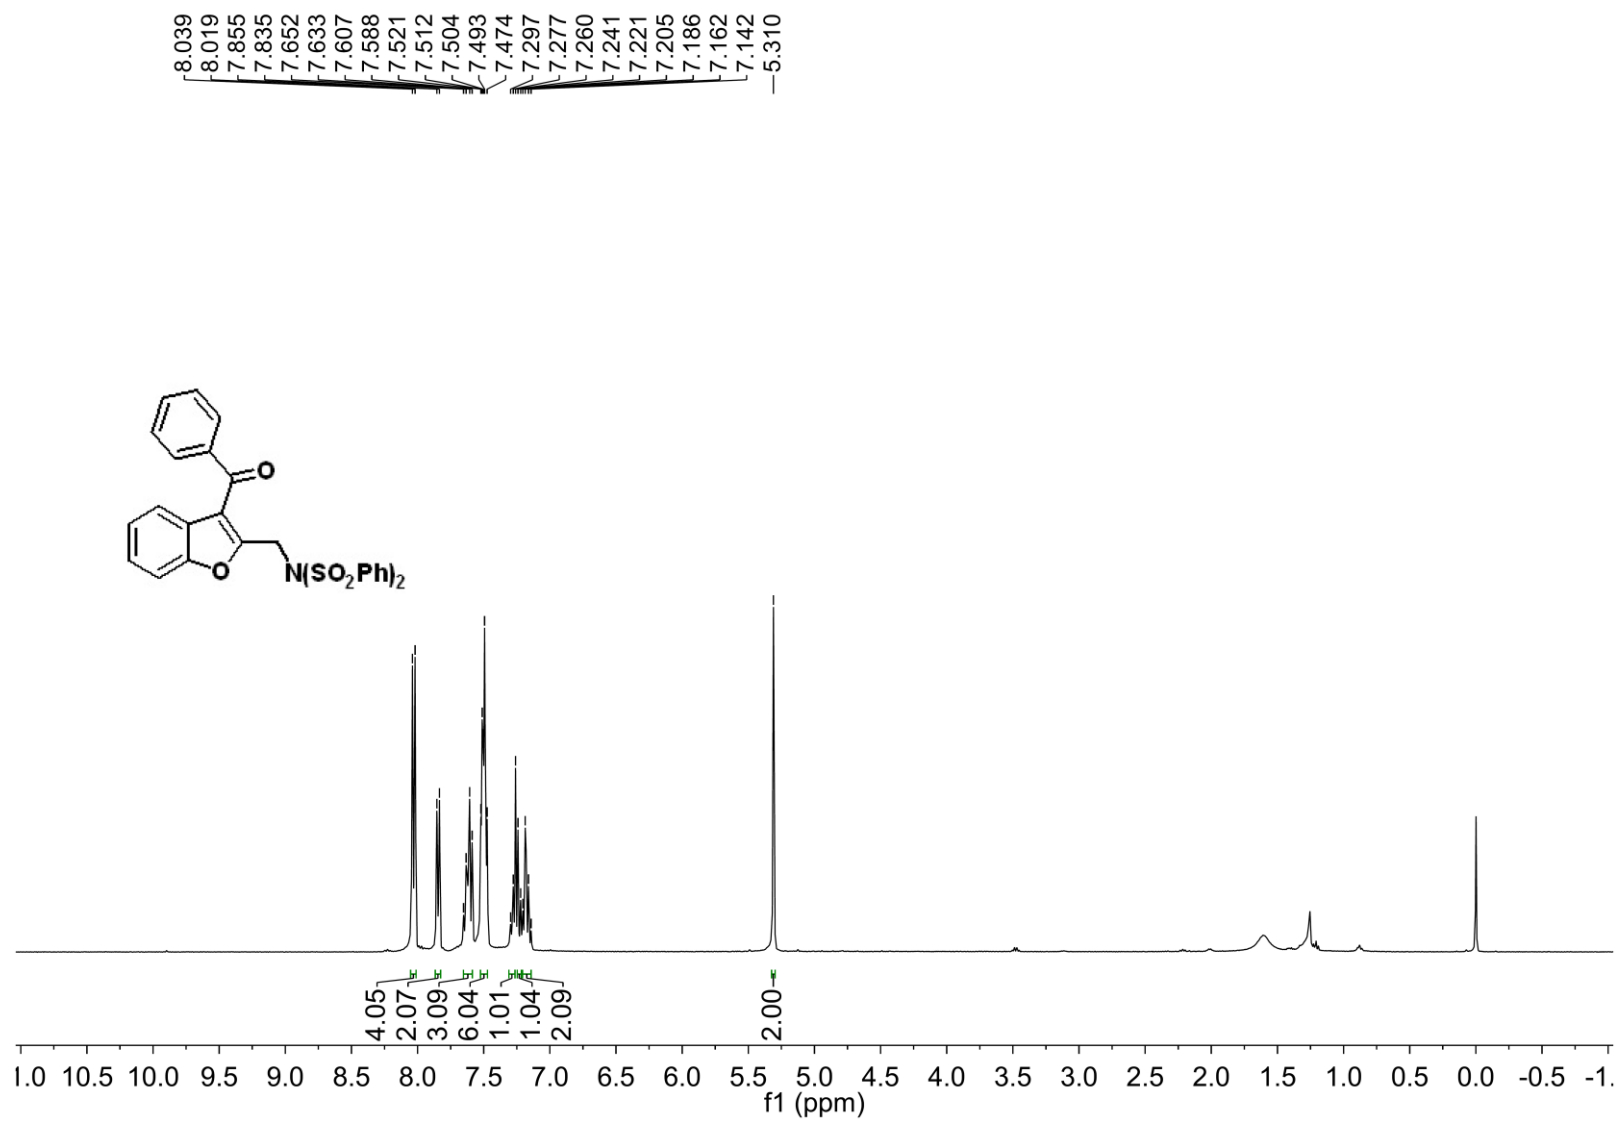

<sup>13</sup>C spectra of compound 4d:

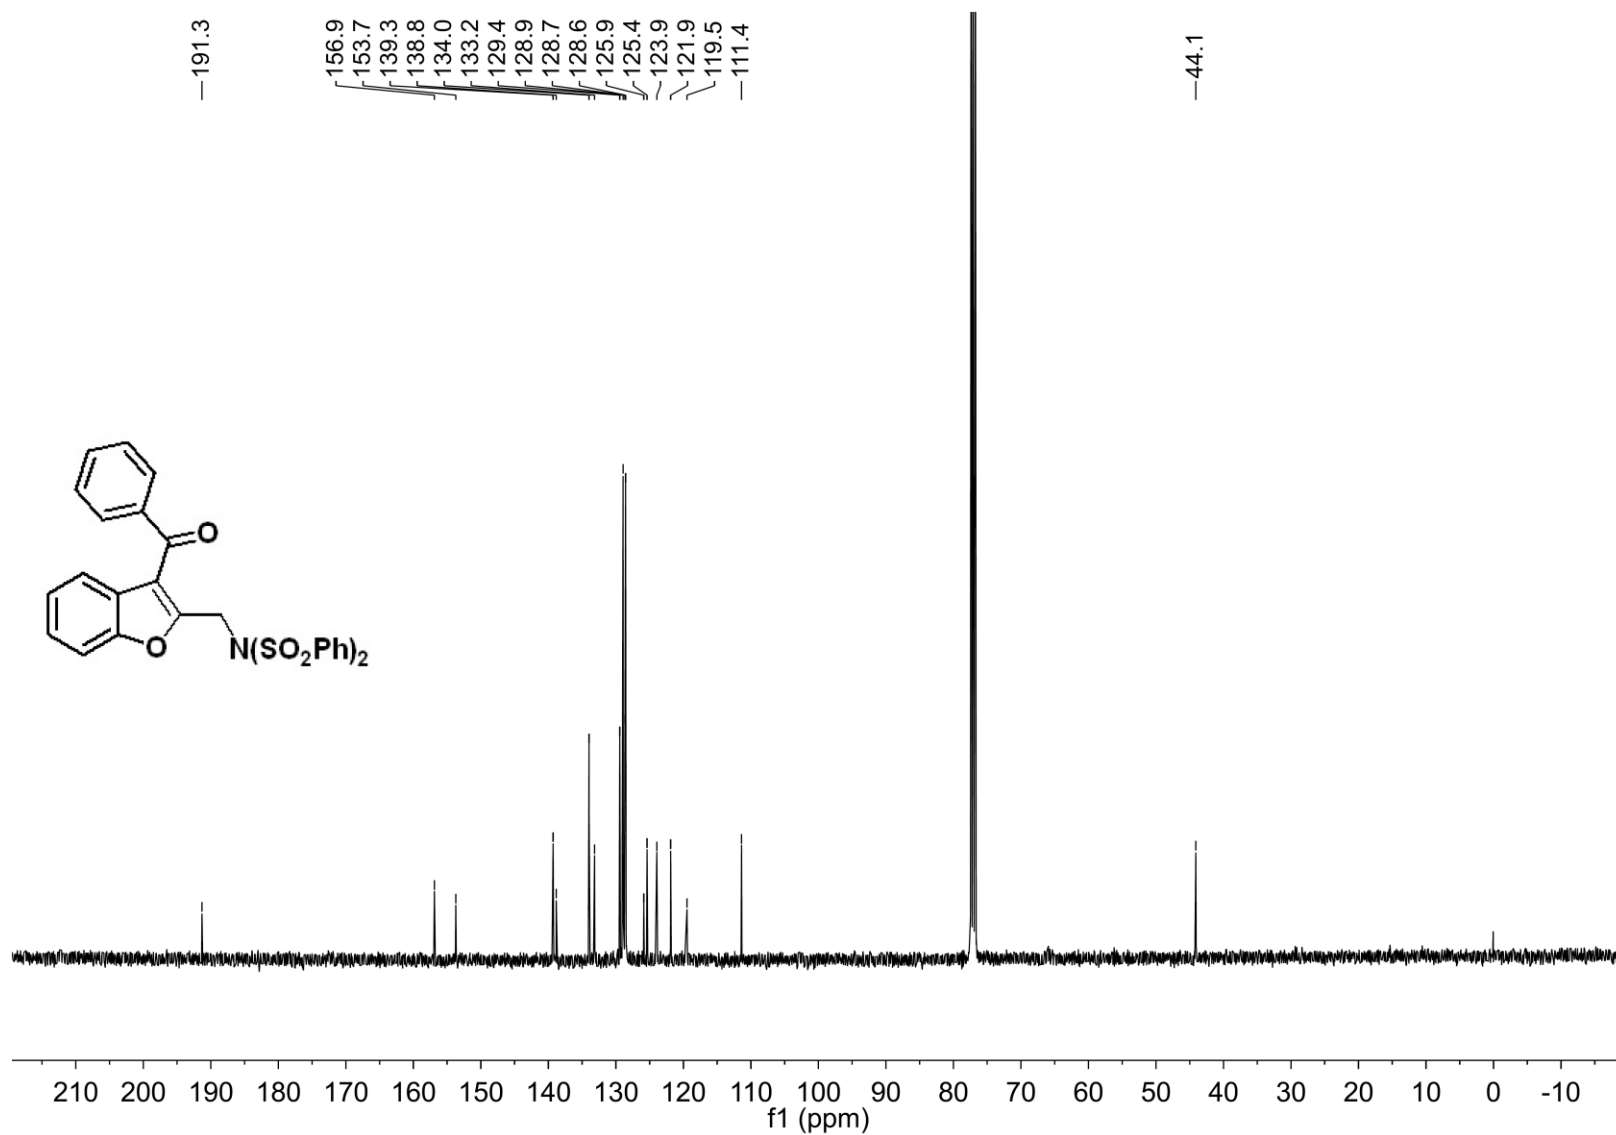



<sup>1</sup>H spectra of compound 4e:

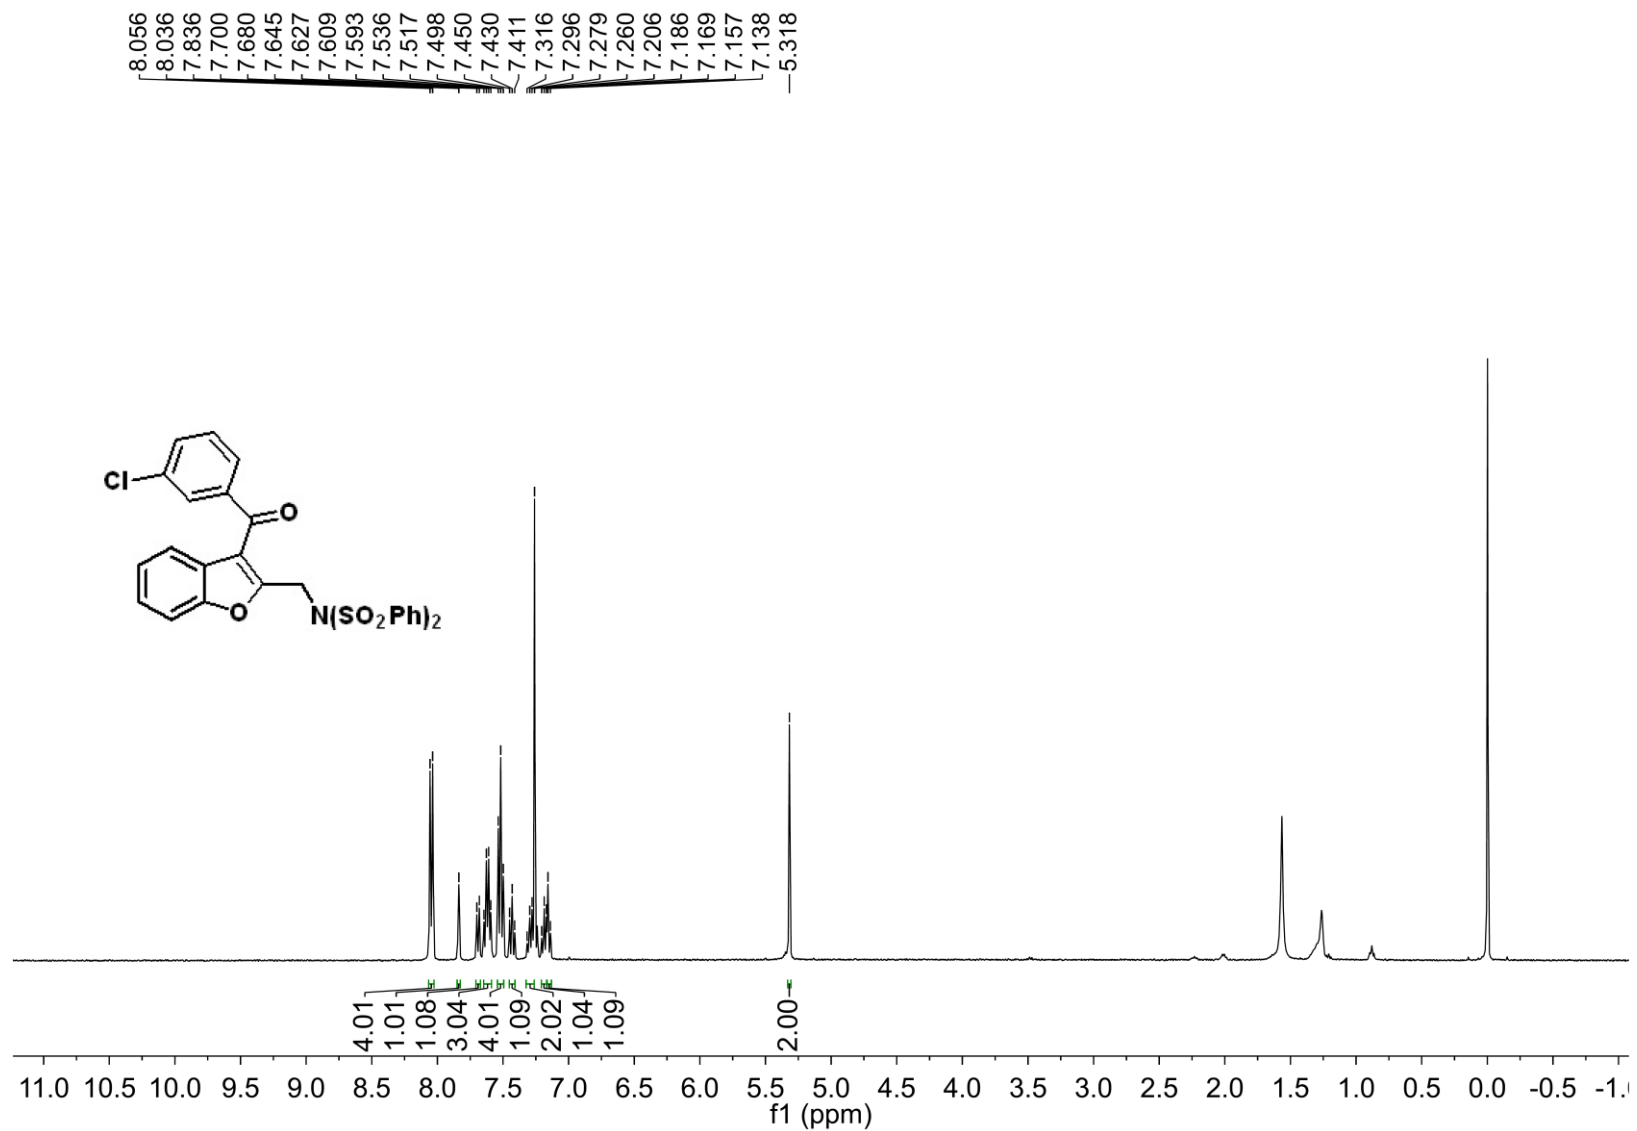

<sup>13</sup>C spectra of compound 4e:

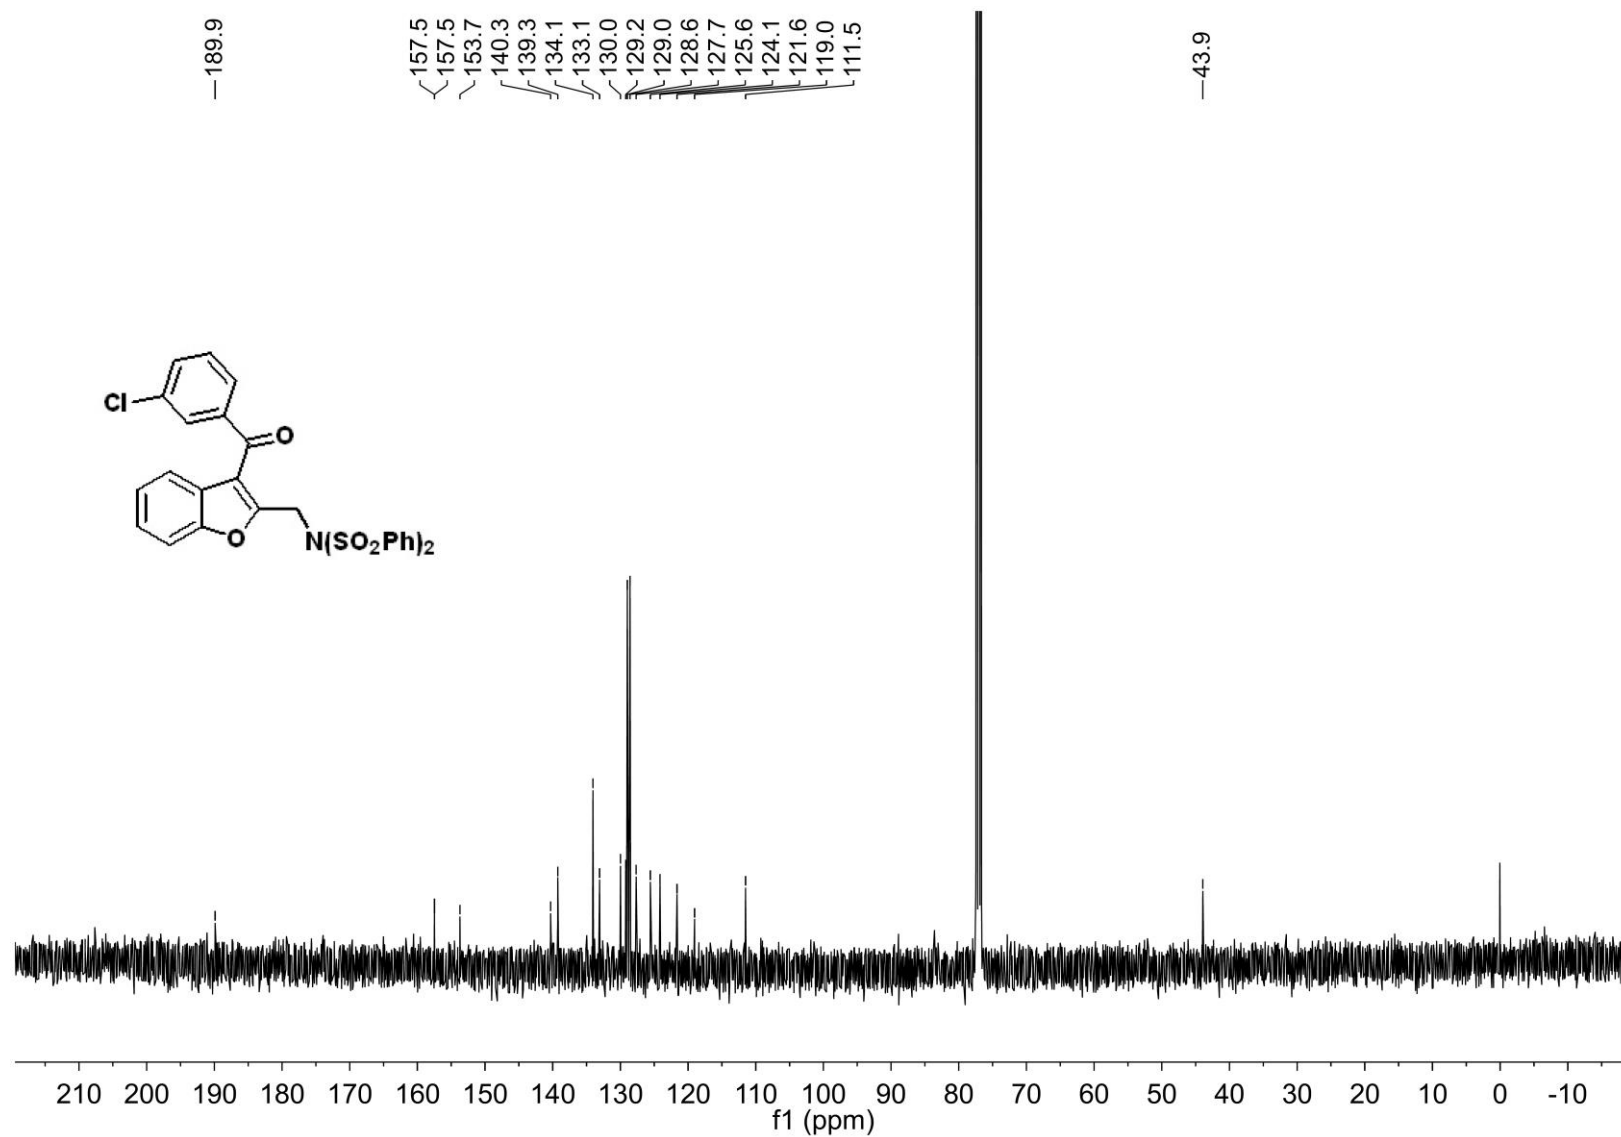

<sup>1</sup>H spectra of compound 4f:

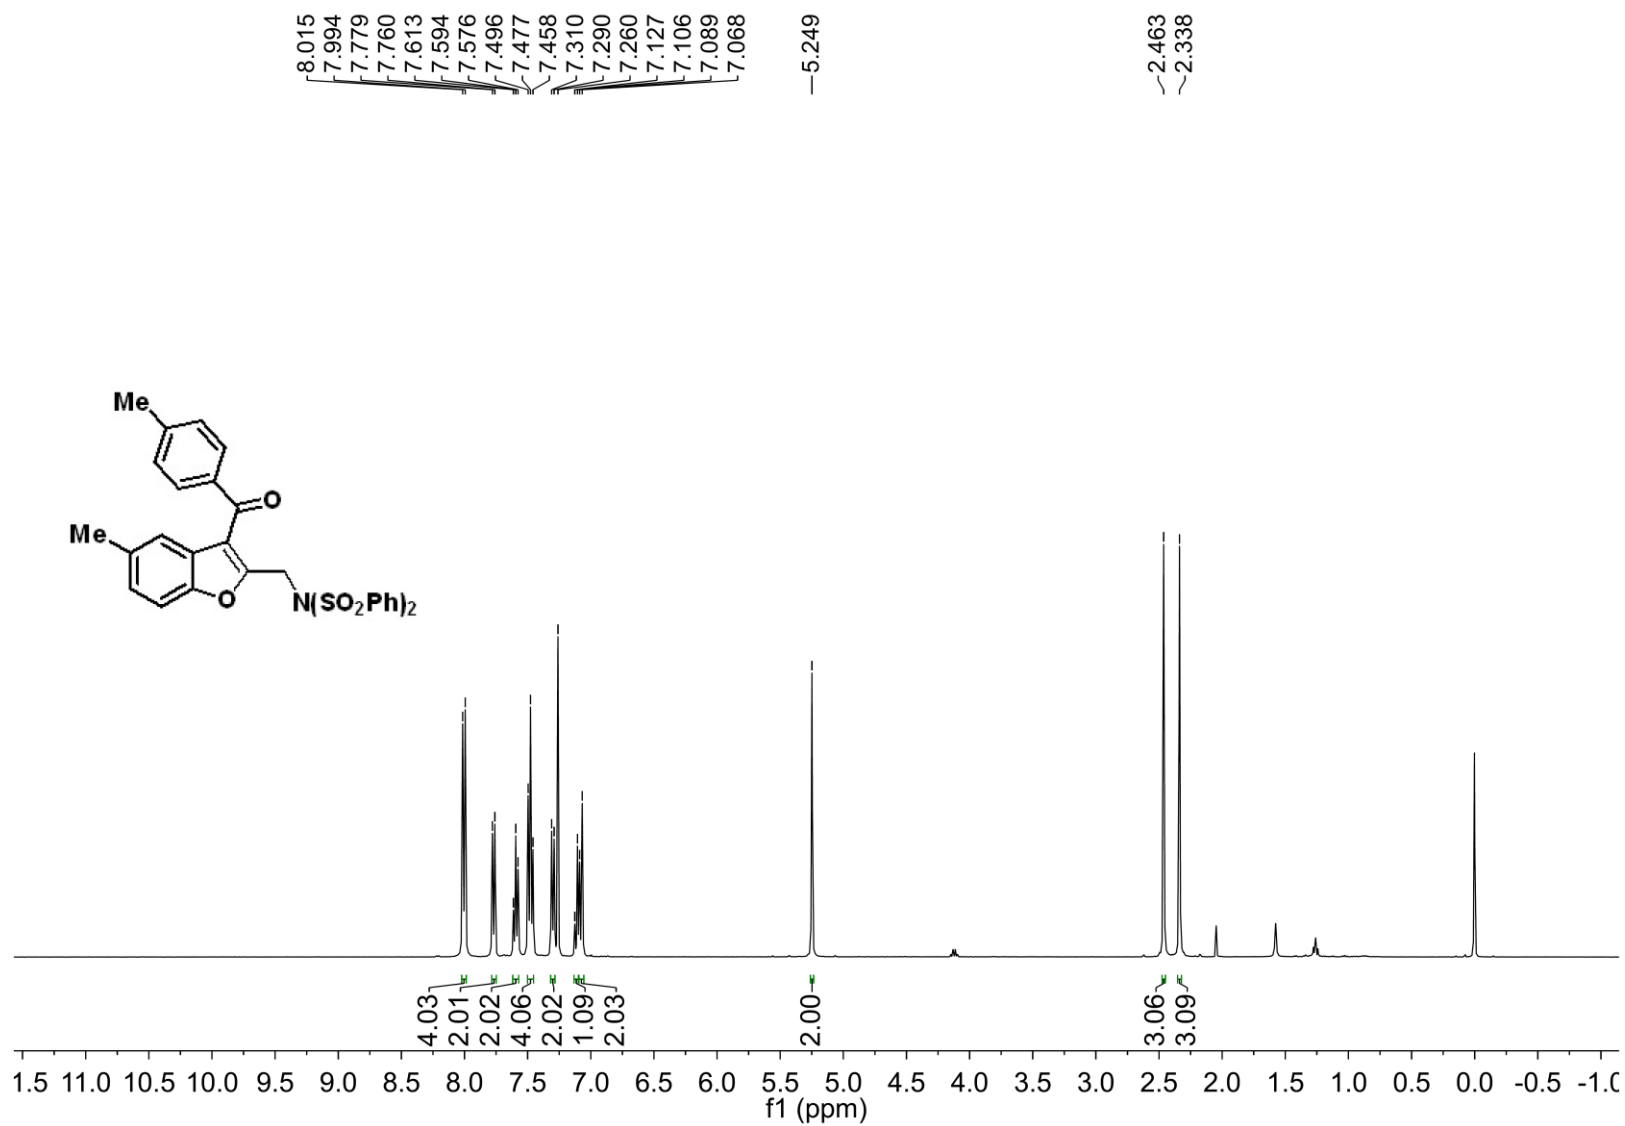

<sup>13</sup>C spectra of compound 4f:

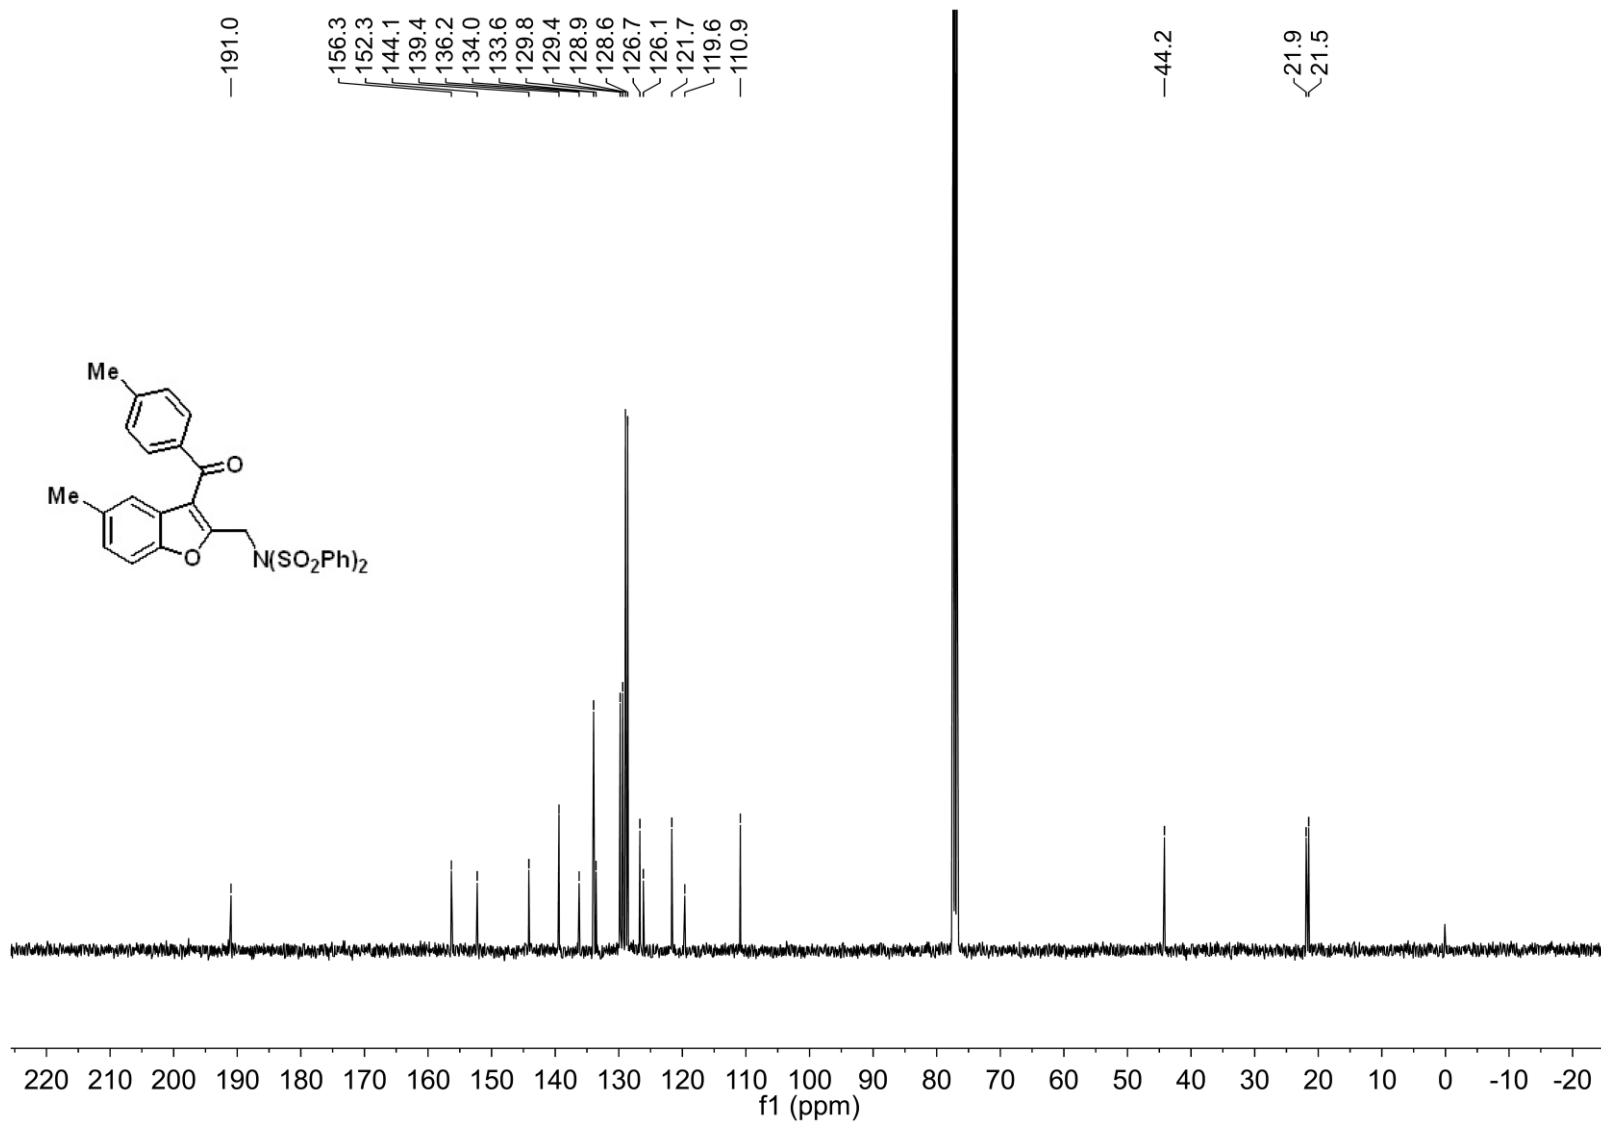

<sup>1</sup>H spectra of compound 5a:

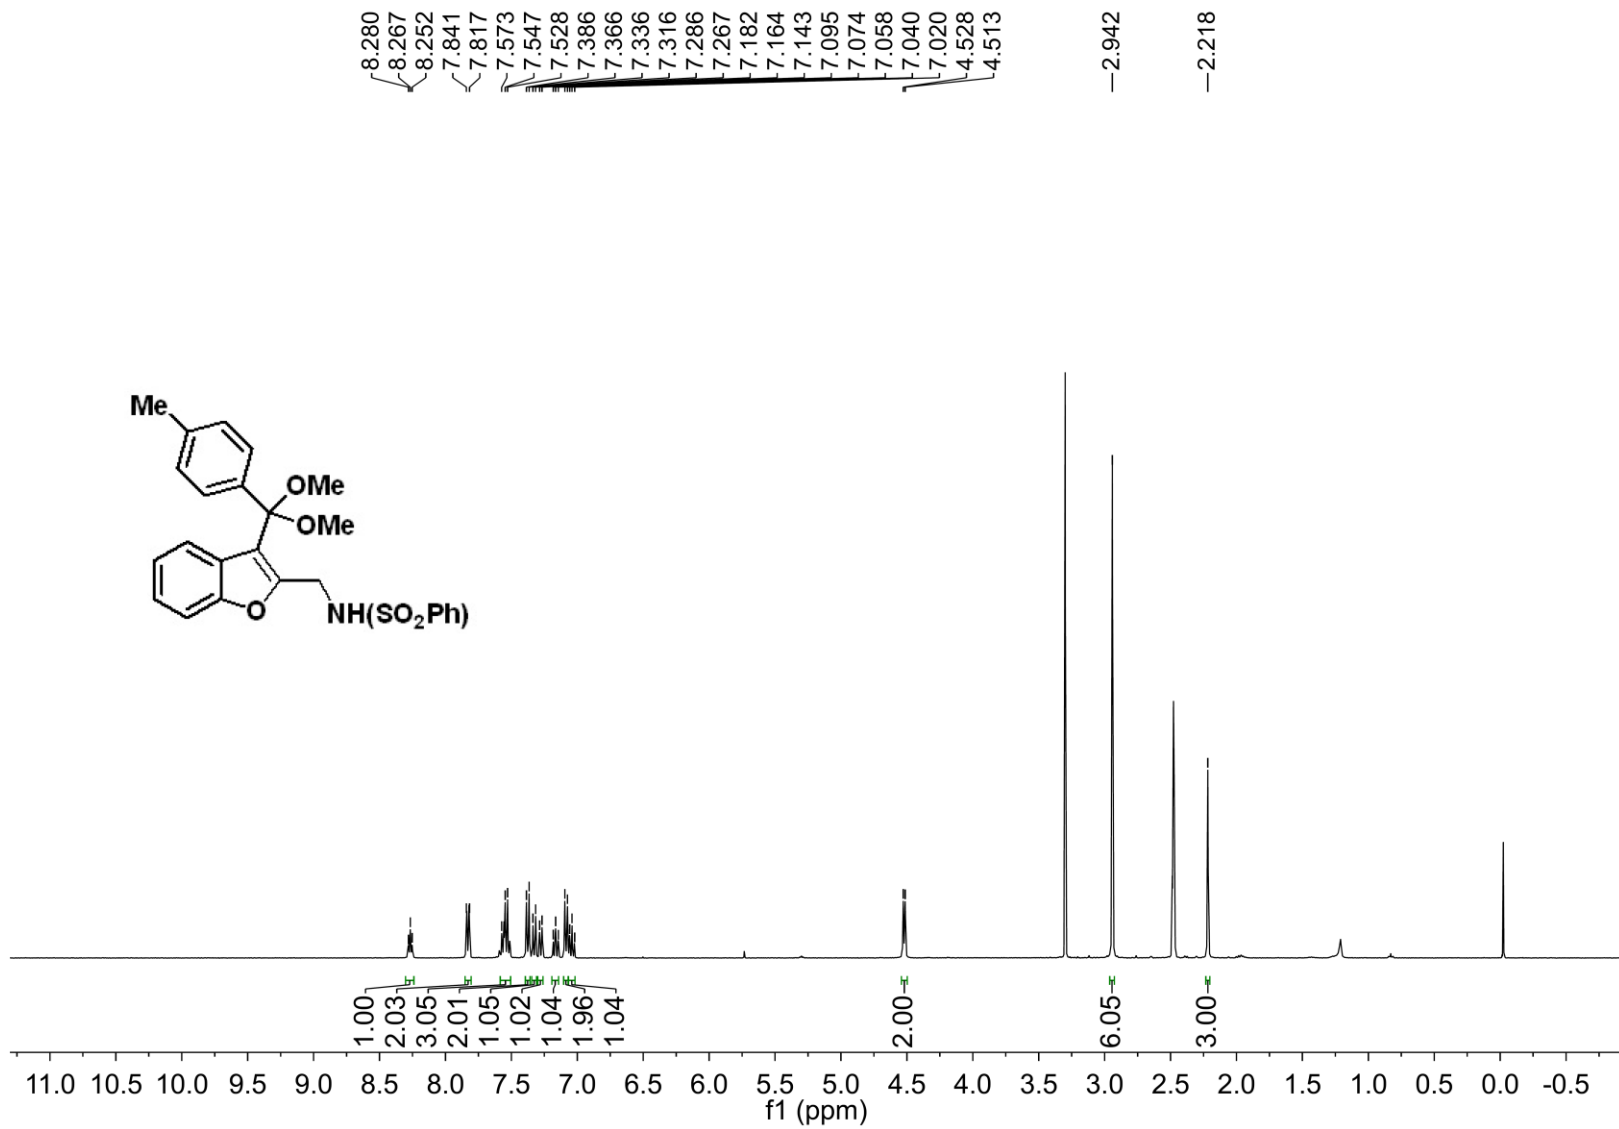

<sup>13</sup>C spectra of compound 5a:

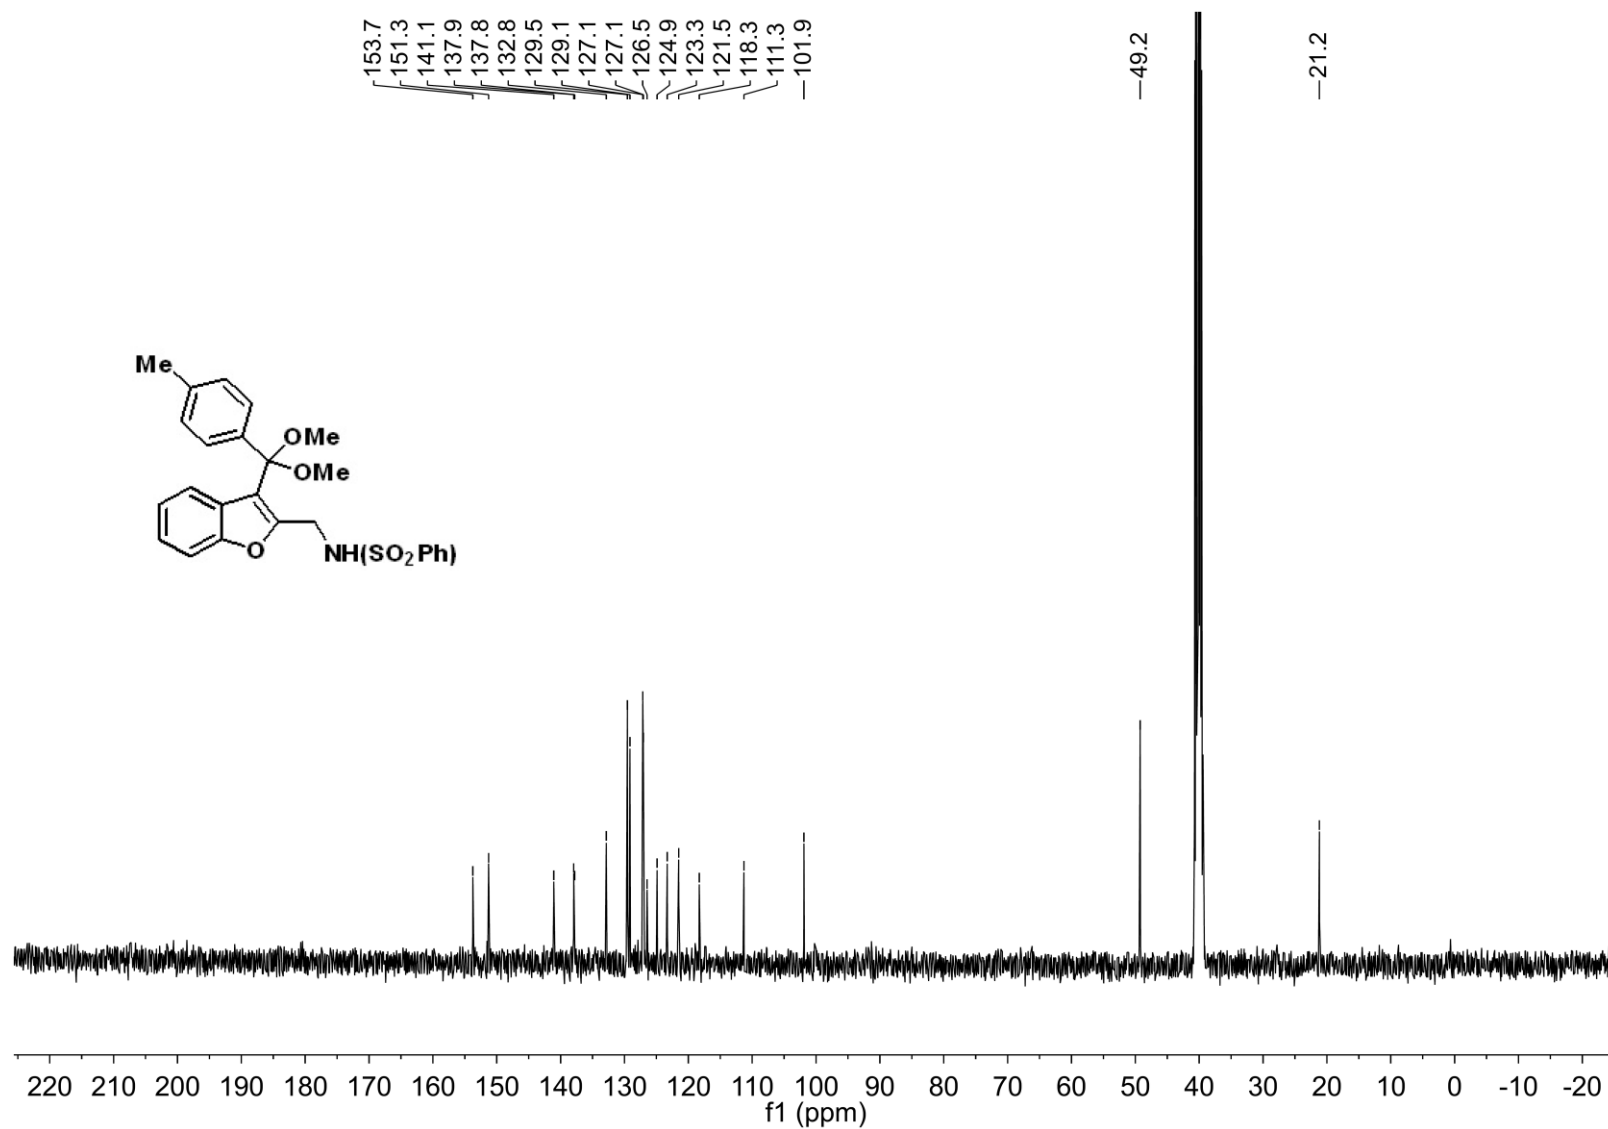

<sup>1</sup>H spectra of compound 6a:

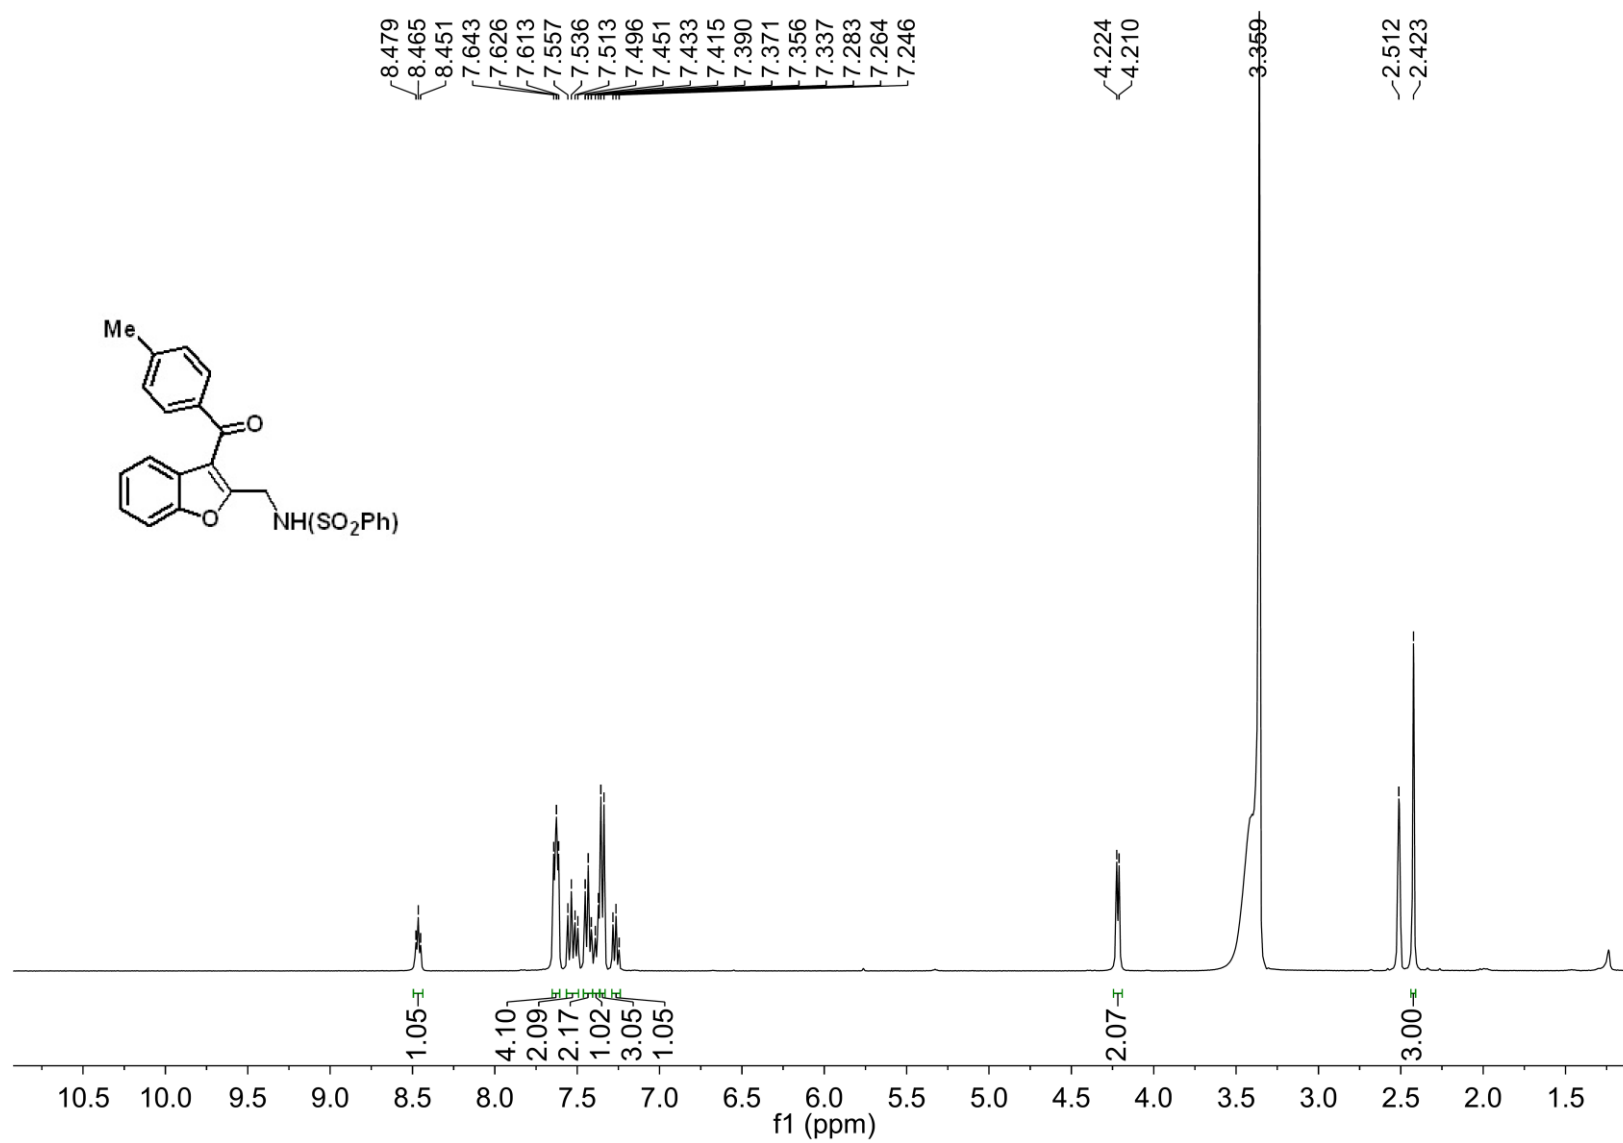

<sup>13</sup>C spectra of compound 6a:

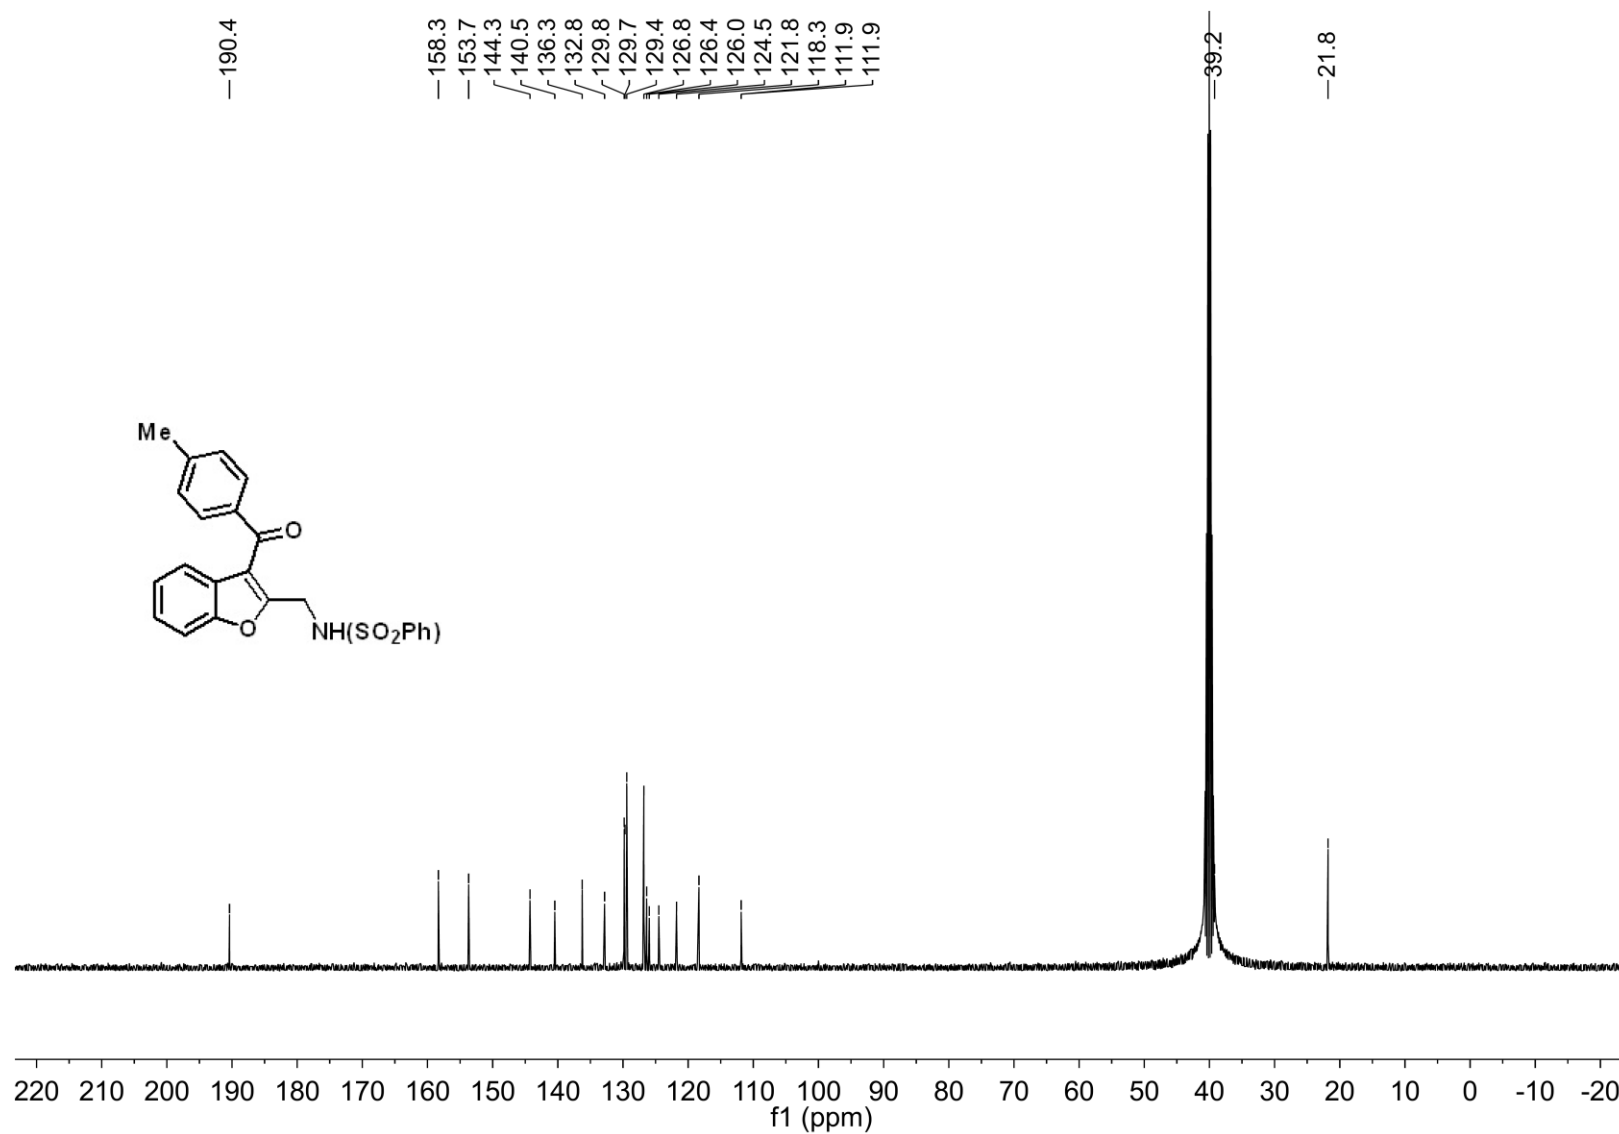

Supplement: d2cc03922b1.pdf [file d2cc03922b1.pdf]
